# Supplementary material for: EPHA2 Interacts with DNA-PKcs in Cell Nucleus and Controls Ionizing Radiation Responses in Non-Small Cell Lung Cancer Cells
Source: MDPI journal article supplement (doi:10.3390/cancers13051010), 2021-02-28
Supplement: s1 [file s1]

## Supplementary Information to

# EPHA2 Interacts with DNA-PK<sub>cs</sub> in Cell Nucleus and Controls Ionizing Radiation Responses in non-small cell lung cancer cells

Vitaliy O. Kaminsky<sup>1\*</sup>, Petra Hååg<sup>1</sup>, Metka Novak<sup>1</sup>, Ákos Végvári<sup>2</sup>, Vasiliki Arapi<sup>1</sup>, Rolf Lewensohn<sup>1,3</sup>, and Kristina Viktorsson<sup>1\*</sup>

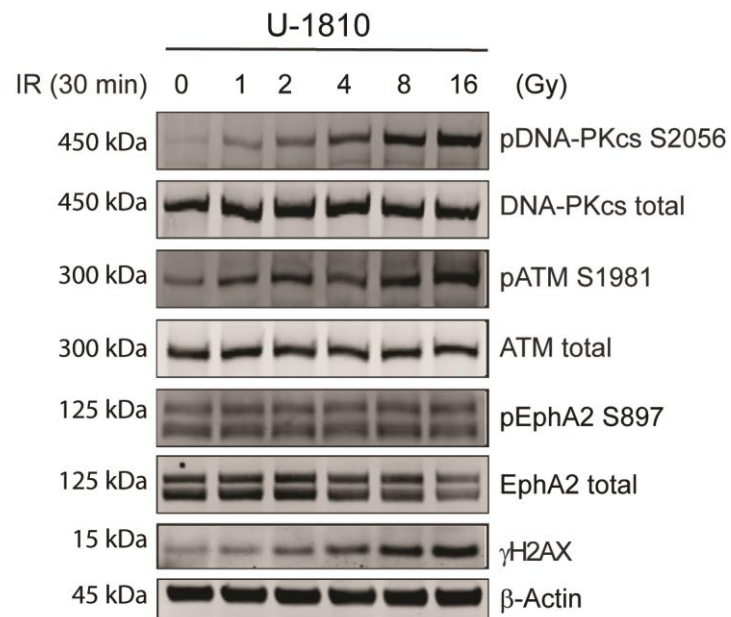

**Supplementary Fig. S1.** IR dose dependent activation of DDR signaling. U-1810 cells were irradiated with different doses and at 30 min profiled for the phosphorylation of DNA-PK<sub>cs</sub> S2056, ATM S1981, EphA2 S897, γH2AX or expression of total DNA-PK<sub>cs</sub>, ATM or EphA2. To control for loading differences β-actin was used.

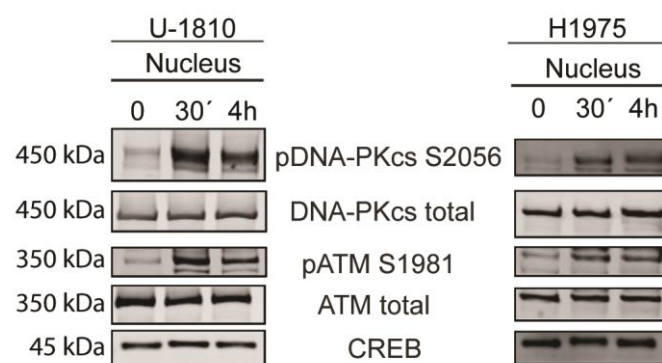

**Supplementary Fig. S2.** Activation of DDR signaling in NSCLC cells. Cells were fractionated into cytosolic and nuclear fractions and nuclear fractions analyzed by immunoblotting for expression of pDNA-PK<sub>cs</sub>(S2056), pATM (S1981) and corresponding total proteins. Expression of CREB was used as a loading control.
