# Supplementary material for: EPHA2 Interacts with DNA-PKcs in Cell Nucleus and Controls Ionizing Radiation Responses in Non-Small Cell Lung Cancer Cells
Source: Cancers (Basel). 2021 Feb 28;13(5):1010. doi: 10.3390/cancers13051010 (PMC7957683; doi:10.3390/cancers13051010)
Supplement: Supplementary file 1 [file cancers-13-01010-s001.zip › Supplementary data Kaminskyy et al.xlsx]

## Sheet: Description of data
	Supplementary data 1: The DNA-PKcs and EphA2 peptides identified by LC-MS/MS analyses are reported
	Fig.4A_EPHA2:	List of EPHA2 peptides identified in EPHA2 IP
	Fig.4A_PRKDC:	List of DNA-PKcs peptides identified in EPHA2 IP
	Fig.4D_EPHA2:	List of EPHA2 peptides identified in DNA-PKcs IP
	Fig.4D_PRKDC:	List of DNA-PKcs peptides identified in DNA-PKcs IP

## Sheet: Fig 4A_EPHA2
prot_hit_num	prot_family_member	prot_acc	prot_desc	prot_score	prot_mass	prot_matches	prot_matches_sig	prot_sequences	prot_sequences_sig	prot_cover	pep_query	pep_rank	pep_isbold	pep_isunique	pep_exp_mz	pep_exp_mr	pep_exp_z	pep_calc_mr	pep_delta	pep_miss	pep_score	pep_expect	pep_res_before	pep_seq	pep_res_after	pep_var_mod	pep_var_mod_pos	pep_summed_mod_pos	pep_local_mod_pos	pep_scan_title
5	1	EPHA2_HUMAN	Ephrin type-A receptor 2 OS=Homo sapiens OX=9606 GN=EPHA2 PE=1 SV=2	726	109679	37	30	30	26	44.9	174	1	1	1	373.227	744.44	2	744.438	0.0015	0	4.47	0.36	R	LEGVISK	Y					Elution from: 24.3277 to 24.3277 RT Apex: 24.40 FinneganScanNumber: 5354
5	1	EPHA2_HUMAN	Ephrin type-A receptor 2 OS=Homo sapiens OX=9606 GN=EPHA2 PE=1 SV=2	726	109679	37	30	30	26	44.9	1080	1	1	1	467.736	933.457	2	933.456	0.0017	0	7.34	0.18	K	TLADFDPR	V					Elution from: 43.0255 to 43.0255 RT Apex: 43.03 FinneganScanNumber: 11297
5	1	EPHA2_HUMAN	Ephrin type-A receptor 2 OS=Homo sapiens OX=9606 GN=EPHA2 PE=1 SV=2	726	109679	37	30	30	26	44.9	1307	1	1	1	489.305	976.595	2	976.596	-0.0004	0	29.72	0.0011	R	IAYSLLGLK	D					Elution from: 62.5975 to 62.5975 RT Apex: 62.71 FinneganScanNumber: 18575
5	1	EPHA2_HUMAN	Ephrin type-A receptor 2 OS=Homo sapiens OX=9606 GN=EPHA2 PE=1 SV=2	726	109679	37	30	30	26	44.9	1838	1	1	1	528.291	1054.57	2	1054.57	0.0012	0	11.71	0.067	K	DQVNTVGIPI	-					Elution from: 79.6298 to 79.6298 RT Apex: 79.73 FinneganScanNumber: 25161
5	1	EPHA2_HUMAN	Ephrin type-A receptor 2 OS=Homo sapiens OX=9606 GN=EPHA2 PE=1 SV=2	726	109679	37	30	30	26	44.9	2287	1	1	1	560.816	1119.62	2	1119.62	0.0001	0	21.65	0.0068	K	FADIVSILDK	L					Elution from: 74.9127 to 74.9127 RT Apex: 75.09 FinneganScanNumber: 23334
5	1	EPHA2_HUMAN	Ephrin type-A receptor 2 OS=Homo sapiens OX=9606 GN=EPHA2 PE=1 SV=2	726	109679	37	30	30	26	44.9	2519	1	1	1	578.79	1155.57	2	1155.57	-0.001	0	23.41	0.0046	R	YSEPPHGLTR	T					Elution from: 21.6478 to 21.6478 RT Apex: 21.83 FinneganScanNumber: 4346
5	1	EPHA2_HUMAN	Ephrin type-A receptor 2 OS=Homo sapiens OX=9606 GN=EPHA2 PE=1 SV=2	726	109679	37	30	30	26	44.9	2521	1	1	1	386.197	1155.57	3	1155.57	0.0004	0	10.89	0.082	R	YSEPPHGLTR	T					Elution from: 22.2997 to 22.2997 RT Apex: 21.81 FinneganScanNumber: 4584
5	1	EPHA2_HUMAN	Ephrin type-A receptor 2 OS=Homo sapiens OX=9606 GN=EPHA2 PE=1 SV=2	726	109679	37	30	30	26	44.9	2522	1	1	1	386.197	1155.57	3	1155.57	0.0025	0	3.98	0.4	R	YSEPPHGLTR	T					Elution from: 21.5388 to 21.5388 RT Apex: 21.81 FinneganScanNumber: 4300
5	1	EPHA2_HUMAN	Ephrin type-A receptor 2 OS=Homo sapiens OX=9606 GN=EPHA2 PE=1 SV=2	726	109679	37	30	30	26	44.9	2797	1	1	1	596.317	1190.62	2	1190.62	0.0016	0	12.24	0.06	R	TVSEWLESIK	M					Elution from: 64.4809 to 64.4809 RT Apex: 64.55 FinneganScanNumber: 19350
5	1	EPHA2_HUMAN	Ephrin type-A receptor 2 OS=Homo sapiens OX=9606 GN=EPHA2 PE=1 SV=2	726	109679	37	30	30	26	44.9	2810	1	1	1	597.301	1192.59	2	1192.59	-0.0004	0	28.75	0.0013	R	WTAPEAISYR	K					Elution from: 49.5262 to 49.5262 RT Apex: 49.62 FinneganScanNumber: 13598
5	1	EPHA2_HUMAN	Ephrin type-A receptor 2 OS=Homo sapiens OX=9606 GN=EPHA2 PE=1 SV=2	726	109679	37	30	30	26	44.9	2840	1	1	1	600.28	1198.55	2	1198.55	-0.005	0	22.69	0.0054	R	QSPEDVYFSK	S					Elution from: 39.8657 to 39.8657 RT Apex: 39.97 FinneganScanNumber: 10247
5	1	EPHA2_HUMAN	Ephrin type-A receptor 2 OS=Homo sapiens OX=9606 GN=EPHA2 PE=1 SV=2	726	109679	37	30	30	26	44.9	3289	1	1	1	634.83	1267.65	2	1267.64	0.0008	0	51.09	7.8e-06	K	VIGAGEFGEVYK	G					Elution from: 51.5923 to 51.5923 RT Apex: 51.66 FinneganScanNumber: 14374
5	1	EPHA2_HUMAN	Ephrin type-A receptor 2 OS=Homo sapiens OX=9606 GN=EPHA2 PE=1 SV=2	726	109679	37	30	30	26	44.9	3319	1	1	1	637.35	1272.69	2	1272.69	-0.0003	0	16.66	0.022	R	NILVNSNLVCK	V					Elution from: 49.2106 to 49.2106 RT Apex: 49.29 FinneganScanNumber: 13472
5	1	EPHA2_HUMAN	Ephrin type-A receptor 2 OS=Homo sapiens OX=9606 GN=EPHA2 PE=1 SV=2	726	109679	37	30	30	26	44.9	3373	1	1	1	640.814	1279.61	2	1279.61	0.0013	0	28.25	0.0015	K	YLANMNYVHR	D					Elution from: 34.0974 to 34.0974 RT Apex: 34.15 FinneganScanNumber: 8425
5	1	EPHA2_HUMAN	Ephrin type-A receptor 2 OS=Homo sapiens OX=9606 GN=EPHA2 PE=1 SV=2	726	109679	37	30	30	26	44.9	3689	1	1	1	440.23	1317.67	3	1317.67	-0.0017	1	21.95	0.0064	K	VVQMTNDDIKR	I					Elution from: 22.4727 to 22.4727 RT Apex: 22.51 FinneganScanNumber: 4649
5	1	EPHA2_HUMAN	Ephrin type-A receptor 2 OS=Homo sapiens OX=9606 GN=EPHA2 PE=1 SV=2	726	109679	37	30	30	26	44.9	3690	1	1	1	659.842	1317.67	2	1317.67	-0.0008	1	18.93	0.013	K	VVQMTNDDIKR	I					Elution from: 22.4105 to 22.4105 RT Apex: 22.51 FinneganScanNumber: 4625
5	1	EPHA2_HUMAN	Ephrin type-A receptor 2 OS=Homo sapiens OX=9606 GN=EPHA2 PE=1 SV=2	726	109679	37	30	30	26	44.9	3786	1	1	1	667.34	1332.67	2	1332.67	-0.0011	0	37.66	0.00017	R	LPSTSGSEGVPFR	T					Elution from: 44.9863 to 44.9863 RT Apex: 45.00 FinneganScanNumber: 11927
5	1	EPHA2_HUMAN	Ephrin type-A receptor 2 OS=Homo sapiens OX=9606 GN=EPHA2 PE=1 SV=2	726	109679	37	30	30	26	44.9	4116	1	1	1	686.359	1370.7	2	1370.7	-0.0001	0	73.65	4.3e-08	R	TASVSINQTEPPK	V					Elution from: 30.6321 to 30.6321 RT Apex: 30.79 FinneganScanNumber: 7277
5	1	EPHA2_HUMAN	Ephrin type-A receptor 2 OS=Homo sapiens OX=9606 GN=EPHA2 PE=1 SV=2	726	109679	37	30	30	26	44.9	4470	1	1	1	707.324	1412.63	2	1412.63	0.0003	0	4.11	0.39	R	LPSTSGSEGVPFR	T	Phospho (ST)	0.0003000000000.0			Elution from: 55.5421 to 55.5421 RT Apex: 55.55 FinneganScanNumber: 15840
5	1	EPHA2_HUMAN	Ephrin type-A receptor 2 OS=Homo sapiens OX=9606 GN=EPHA2 PE=1 SV=2	726	109679	37	30	30	26	44.9	4763	1	1	1	724.353	1446.69	2	1446.69	-0.0011	0	28.83	0.0013	K	FTTEIHPSCVTR	Q					Elution from: 32.8573 to 32.8573 RT Apex: 32.88 FinneganScanNumber: 8019
5	1	EPHA2_HUMAN	Ephrin type-A receptor 2 OS=Homo sapiens OX=9606 GN=EPHA2 PE=1 SV=2	726	109679	37	30	30	26	44.9	5749	1	1	1	782.413	1562.81	2	1562.81	-0.0006	0	34.15	0.00038	K	DGEFSVLQLVGMLR	G					Elution from: 99.7239 to 99.7239 RT Apex: 99.71 FinneganScanNumber: 31707
5	1	EPHA2_HUMAN	Ephrin type-A receptor 2 OS=Homo sapiens OX=9606 GN=EPHA2 PE=1 SV=2	726	109679	37	30	30	26	44.9	6988	1	1	1	841.892	1681.77	2	1681.77	0.002	0	70.34	9.3e-08	R	VLEDDPEATYTTSGGK	I					Elution from: 37.5941 to 37.5941 RT Apex: 37.72 FinneganScanNumber: 9526
5	1	EPHA2_HUMAN	Ephrin type-A receptor 2 OS=Homo sapiens OX=9606 GN=EPHA2 PE=1 SV=2	726	109679	37	30	30	26	44.9	8145	1	1	1	607.658	1819.95	3	1819.95	0.0014	1	28.04	0.0016	R	EKDGEFSVLQLVGMLR	G					Elution from: 91.2974 to 91.2974 RT Apex: 91.41 FinneganScanNumber: 29229
5	1	EPHA2_HUMAN	Ephrin type-A receptor 2 OS=Homo sapiens OX=9606 GN=EPHA2 PE=1 SV=2	726	109679	37	30	30	26	44.9	9683	1	1	1	979.502	1956.99	2	1956.99	-0.0009	0	44.47	3.6e-05	R	STTSLSVSWSIPPPQQSR	V					Elution from: 64.6560 to 64.6560 RT Apex: 64.67 FinneganScanNumber: 19416
5	1	EPHA2_HUMAN	Ephrin type-A receptor 2 OS=Homo sapiens OX=9606 GN=EPHA2 PE=1 SV=2	726	109679	37	30	30	26	44.9	9684	1	1	1	979.503	1956.99	2	1956.99	0.0005	0	34.91	0.00032	R	STTSLSVSWSIPPPQQSR	V					Elution from: 63.8841 to 63.8841 RT Apex: 64.10 FinneganScanNumber: 19108
5	1	EPHA2_HUMAN	Ephrin type-A receptor 2 OS=Homo sapiens OX=9606 GN=EPHA2 PE=1 SV=2	726	109679	37	30	30	26	44.9	10004	1	1	1	663.989	1988.95	3	1988.95	-0.0016	0	21.01	0.0079	K	TYVDPHTYEDPNQAVLK	F					Elution from: 46.2819 to 46.2819 RT Apex: 46.42 FinneganScanNumber: 12382
5	1	EPHA2_HUMAN	Ephrin type-A receptor 2 OS=Homo sapiens OX=9606 GN=EPHA2 PE=1 SV=2	726	109679	37	30	30	26	44.9	11153	1	1	1	1059.98	2117.95	2	2117.95	-0.0038	0	62.68	5.4e-07	K	MQQYTEHFMAAGYTAIEK	V					Elution from: 53.3125 to 53.3125 RT Apex: 53.38 FinneganScanNumber: 14971
5	1	EPHA2_HUMAN	Ephrin type-A receptor 2 OS=Homo sapiens OX=9606 GN=EPHA2 PE=1 SV=2	726	109679	37	30	30	26	44.9	11154	1	1	1	706.992	2117.96	3	2117.95	0.0004	0	33.7	0.00043	K	MQQYTEHFMAAGYTAIEK	V					Elution from: 53.3153 to 53.3153 RT Apex: 53.38 FinneganScanNumber: 14973
5	1	EPHA2_HUMAN	Ephrin type-A receptor 2 OS=Homo sapiens OX=9606 GN=EPHA2 PE=1 SV=2	726	109679	37	30	30	26	44.9	12471	1	1	1	747.713	2240.12	3	2240.12	0.0002	0	30.14	0.00097	R	VDFLGEAGIMGQFSHHNIIR	L					Elution from: 69.8008 to 69.8008 RT Apex: 69.11 FinneganScanNumber: 21368
5	1	EPHA2_HUMAN	Ephrin type-A receptor 2 OS=Homo sapiens OX=9606 GN=EPHA2 PE=1 SV=2	726	109679	37	30	30	26	44.9	12472	1	1	1	561.037	2240.12	4	2240.12	0.0024	0	33.92	0.00041	R	VDFLGEAGIMGQFSHHNIIR	L					Elution from: 69.6559 to 69.6559 RT Apex: 69.73 FinneganScanNumber: 21317
5	1	EPHA2_HUMAN	Ephrin type-A receptor 2 OS=Homo sapiens OX=9606 GN=EPHA2 PE=1 SV=2	726	109679	37	30	30	26	44.9	13780	1	1	1	1209.54	2417.07	2	2417.07	0.0015	0	65.53	2.8e-07	K	ETFNLYYAESDLDYGTNFQK	R					Elution from: 78.1223 to 78.1223 RT Apex: 78.20 FinneganScanNumber: 24583
5	1	EPHA2_HUMAN	Ephrin type-A receptor 2 OS=Homo sapiens OX=9606 GN=EPHA2 PE=1 SV=2	726	109679	37	30	30	26	44.9	16040	1	1	1	941.089	2820.24	3	2820.25	-0.0046	0	57.56	1.8e-06	R	MHCAVDGEWLVPIGQCLCQAGYEK	V					Elution from: 74.1971 to 74.1971 RT Apex: 74.30 FinneganScanNumber: 23050
5	1	EPHA2_HUMAN	Ephrin type-A receptor 2 OS=Homo sapiens OX=9606 GN=EPHA2 PE=1 SV=2	726	109679	37	30	30	26	44.9	16348	1	1	1	970.133	2907.38	3	2907.38	-0.0058	0	30.77	0.00084	R	APQDPASMPCTRPPSAPHYLTAVGMGAK	V					Elution from: 51.2354 to 51.2354 RT Apex: 51.25 FinneganScanNumber: 14237
5	1	EPHA2_HUMAN	Ephrin type-A receptor 2 OS=Homo sapiens OX=9606 GN=EPHA2 PE=1 SV=2	726	109679	37	30	30	26	44.9	17237	1	1	1	1068.77	3203.29	3	3203.29	-0.002	0	36.57	0.00022	R	EDIVYSVTCEQCWPESGECGPCEASVR	Y					Elution from: 68.1477 to 68.1477 RT Apex: 68.17 FinneganScanNumber: 20744
5	1	EPHA2_HUMAN	Ephrin type-A receptor 2 OS=Homo sapiens OX=9606 GN=EPHA2 PE=1 SV=2	726	109679	37	30	30	26	44.9	18610	1	1	1	1282.86	3845.57	3	3845.56	0.0088	0	44.71	3.4e-05	K	FEASESPCLECPEHTLPSPEGATSCECEEGFFR	A					Elution from: 66.6969 to 66.6969 RT Apex: 66.76 FinneganScanNumber: 20264
5	1	EPHA2_HUMAN	Ephrin type-A receptor 2 OS=Homo sapiens OX=9606 GN=EPHA2 PE=1 SV=2	726	109679	37	30	30	26	44.9	19229	1	1	1	1131.56	4522.19	4	4522.19	0.0044	0	52.88	5.2e-06	K	CPELLQGLAHFPETIAGSDAPSLATVAGTCVDHAVVPPGGEEPR	M					Elution from: 87.1026 to 87.1026 RT Apex: 87.21 FinneganScanNumber: 27820
5	1	EPHA2_HUMAN	Ephrin type-A receptor 2 OS=Homo sapiens OX=9606 GN=EPHA2 PE=1 SV=2	726	109679	37	30	30	26	44.9	19348	1	1	1	931.066	4650.29	5	4650.28	0.0099	1	17.9	0.016	K	KCPELLQGLAHFPETIAGSDAPSLATVAGTCVDHAVVPPGGEEPR	M					Elution from: 79.8148 to 79.8148 RT Apex: 79.86 FinneganScanNumber: 25234
Removing duplicates
LEGVISK
TLADFDPR
IAYSLLGLK
DQVNTVGIPI
FADIVSILDK
YSEPPHGLTR
TVSEWLESIK
WTAPEAISYR
QSPEDVYFSK
VIGAGEFGEVYK
NILVNSNLVCK
YLANMNYVHR
VVQMTNDDIKR
LPSTSGSEGVPFR
TASVSINQTEPPK
FTTEIHPSCVTR
DGEFSVLQLVGMLR
VLEDDPEATYTTSGGK
EKDGEFSVLQLVGMLR
STTSLSVSWSIPPPQQSR
TYVDPHTYEDPNQAVLK
MQQYTEHFMAAGYTAIEK
VDFLGEAGIMGQFSHHNIIR
ETFNLYYAESDLDYGTNFQK
MHCAVDGEWLVPIGQCLCQAGYEK
APQDPASMPCTRPPSAPHYLTAVGMGAK
EDIVYSVTCEQCWPESGECGPCEASVR
FEASESPCLECPEHTLPSPEGATSCECEEGFFR
CPELLQGLAHFPETIAGSDAPSLATVAGTCVDHAVVPPGGEEPR
KCPELLQGLAHFPETIAGSDAPSLATVAGTCVDHAVVPPGGEEPR

## Sheet: Fig 4A_PRKDC
prot_hit_num	prot_family_member	prot_acc	prot_desc	prot_score	prot_mass	prot_matches	prot_matches_sig	prot_sequences	prot_sequences_sig	prot_cover	pep_query	pep_rank	pep_isbold	pep_isunique	pep_exp_mz	pep_exp_mr	pep_exp_z	pep_calc_mr	pep_delta	pep_miss	pep_score	pep_expect	pep_res_before	pep_seq	pep_res_after	pep_var_mod	pep_var_mod_pos	pep_summed_mod_pos	pep_local_mod_pos	pep_scan_title
6	1	PRKDC_HUMAN	DNA-dependent protein kinase catalytic subunit OS=Homo sapiens OX=9606 GN=PRKDC PE=1 SV=3	642	473749	47	31	46	30	13.1	137	1	1	1	367.221	732.428	2	732.428	-0.0002	0	3.29	0.47	K	NILAFR	D					Elution from: 46.8763 to 46.8763 RT Apex: 46.90 FinneganScanNumber: 12606
6	1	PRKDC_HUMAN	DNA-dependent protein kinase catalytic subunit OS=Homo sapiens OX=9606 GN=PRKDC PE=1 SV=3	642	473749	47	31	46	30	13.1	201	1	1	1	376.19	750.366	2	750.366	0	0	6.5	0.22	R	QSFVDR	S					Elution from: 20.8408 to 20.8408 RT Apex: 20.81 FinneganScanNumber: 4050
6	1	PRKDC_HUMAN	DNA-dependent protein kinase catalytic subunit OS=Homo sapiens OX=9606 GN=PRKDC PE=1 SV=3	642	473749	47	31	46	30	13.1	216	1	1	1	378.237	754.459	2	754.459	0.0002	0	5.66	0.27	K	VPADLLK	R					Elution from: 37.7030 to 37.7030 RT Apex: 37.60 FinneganScanNumber: 9566
6	1	PRKDC_HUMAN	DNA-dependent protein kinase catalytic subunit OS=Homo sapiens OX=9606 GN=PRKDC PE=1 SV=3	642	473749	47	31	46	30	13.1	613	1	1	1	423.266	844.517	2	844.517	-0.0002	0	3.89	0.41	R	TFPVLLR	L					Elution from: 58.9417 to 58.9417 RT Apex: 59.02 FinneganScanNumber: 17149
6	1	PRKDC_HUMAN	DNA-dependent protein kinase catalytic subunit OS=Homo sapiens OX=9606 GN=PRKDC PE=1 SV=3	642	473749	47	31	46	30	13.1	800	1	1	1	439.761	877.508	2	877.51	-0.0013	0	13.69	0.043	R	LLNFLMK	H					Elution from: 65.1414 to 65.1414 RT Apex: 65.22 FinneganScanNumber: 19612
6	1	PRKDC_HUMAN	DNA-dependent protein kinase catalytic subunit OS=Homo sapiens OX=9606 GN=PRKDC PE=1 SV=3	642	473749	47	31	46	30	13.1	894	1	1	1	450.248	898.48	2	898.48	0.0005	0	6.34	0.23	K	SIELFYK	F					Elution from: 52.8917 to 52.8917 RT Apex: 52.91 FinneganScanNumber: 14806
6	1	PRKDC_HUMAN	DNA-dependent protein kinase catalytic subunit OS=Homo sapiens OX=9606 GN=PRKDC PE=1 SV=3	642	473749	47	31	46	30	13.1	1113	1	1	1	470.739	939.463	2	939.466	-0.0031	0	11.72	0.067	R	TETVTSFR	K					Elution from: 28.5526 to 28.5526 RT Apex: 28.60 FinneganScanNumber: 6577
6	1	PRKDC_HUMAN	DNA-dependent protein kinase catalytic subunit OS=Homo sapiens OX=9606 GN=PRKDC PE=1 SV=3	642	473749	47	31	46	30	13.1	1114	1	1	1	470.761	939.507	2	939.506	0.0009	0	2.53	0.56	K	FYGELALK	K					Elution from: 51.1480 to 51.1480 RT Apex: 51.20 FinneganScanNumber: 14205
6	1	PRKDC_HUMAN	DNA-dependent protein kinase catalytic subunit OS=Homo sapiens OX=9606 GN=PRKDC PE=1 SV=3	642	473749	47	31	46	30	13.1	1181	1	1	1	476.297	950.58	2	950.58	0.0002	0	15.46	0.028	R	LLPAELPAK	R					Elution from: 46.1927 to 46.1927 RT Apex: 46.17 FinneganScanNumber: 12346
6	1	PRKDC_HUMAN	DNA-dependent protein kinase catalytic subunit OS=Homo sapiens OX=9606 GN=PRKDC PE=1 SV=3	642	473749	47	31	46	30	13.1	1200	1	1	1	478.792	955.57	2	955.57	0.0001	0	16.64	0.022	R	LLEEALLR	L					Elution from: 55.8459 to 55.8459 RT Apex: 55.88 FinneganScanNumber: 15950
6	1	PRKDC_HUMAN	DNA-dependent protein kinase catalytic subunit OS=Homo sapiens OX=9606 GN=PRKDC PE=1 SV=3	642	473749	47	31	46	30	13.1	1408	1	1	1	498.328	994.642	2	994.643	-0.0004	0	18.89	0.013	K	IPALDLLIK	L					Elution from: 76.9764 to 76.9764 RT Apex: 77.13 FinneganScanNumber: 24137
6	1	PRKDC_HUMAN	DNA-dependent protein kinase catalytic subunit OS=Homo sapiens OX=9606 GN=PRKDC PE=1 SV=3	642	473749	47	31	46	30	13.1	1413	1	1	1	498.778	995.541	2	995.54	0.0013	0	8.14	0.15	K	DILETHLR	E					Elution from: 38.6112 to 38.6112 RT Apex: 38.68 FinneganScanNumber: 9853
6	1	PRKDC_HUMAN	DNA-dependent protein kinase catalytic subunit OS=Homo sapiens OX=9606 GN=PRKDC PE=1 SV=3	642	473749	47	31	46	30	13.1	1507	1	1	1	505.289	1008.56	2	1008.56	0	0	3.32	0.47	R	EIFNFVLK	A					Elution from: 71.8801 to 71.8801 RT Apex: 71.90 FinneganScanNumber: 22182
6	1	PRKDC_HUMAN	DNA-dependent protein kinase catalytic subunit OS=Homo sapiens OX=9606 GN=PRKDC PE=1 SV=3	642	473749	47	31	46	30	13.1	1956	1	1	1	535.261	1068.51	2	1068.51	0.002	0	13.68	0.043	R	GYGLFAGPCK	V					Elution from: 48.1457 to 48.1457 RT Apex: 48.16 FinneganScanNumber: 13096
6	1	PRKDC_HUMAN	DNA-dependent protein kinase catalytic subunit OS=Homo sapiens OX=9606 GN=PRKDC PE=1 SV=3	642	473749	47	31	46	30	13.1	2188	1	1	1	552.29	1102.57	2	1102.56	0.0032	0	19.79	0.01	R	LQETLSAADR	C					Elution from: 28.9132 to 28.9132 RT Apex: 28.92 FinneganScanNumber: 6688
6	1	PRKDC_HUMAN	DNA-dependent protein kinase catalytic subunit OS=Homo sapiens OX=9606 GN=PRKDC PE=1 SV=3	642	473749	47	31	46	30	13.1	2459	1	1	1	575.33	1148.64	2	1148.64	0.001	0	8.99	0.13	K	AALSALESFLK	Q					Elution from: 77.3331 to 77.3331 RT Apex: 77.46 FinneganScanNumber: 24284
6	1	PRKDC_HUMAN	DNA-dependent protein kinase catalytic subunit OS=Homo sapiens OX=9606 GN=PRKDC PE=1 SV=3	642	473749	47	31	46	30	13.1	2523	1	1	1	578.796	1155.58	2	1155.58	-0.0001	0	14.51	0.035	R	LGLPGDEVDNK	V					Elution from: 41.7811 to 41.7811 RT Apex: 41.90 FinneganScanNumber: 10891
6	1	PRKDC_HUMAN	DNA-dependent protein kinase catalytic subunit OS=Homo sapiens OX=9606 GN=PRKDC PE=1 SV=3	642	473749	47	31	46	30	13.1	2820	1	1	1	399.225	1194.65	3	1194.65	0.0019	0	12.52	0.056	R	GKPLPEYHVR	I					Elution from: 20.2533 to 20.2533 RT Apex: 20.35 FinneganScanNumber: 3824
6	1	PRKDC_HUMAN	DNA-dependent protein kinase catalytic subunit OS=Homo sapiens OX=9606 GN=PRKDC PE=1 SV=3	642	473749	47	31	46	30	13.1	2911	1	1	1	603.372	1204.73	2	1204.73	0.0003	0	6.64	0.22	K	LGNPIVPLNIR	L					Elution from: 64.4671 to 64.4671 RT Apex: 64.52 FinneganScanNumber: 19346
6	1	PRKDC_HUMAN	DNA-dependent protein kinase catalytic subunit OS=Homo sapiens OX=9606 GN=PRKDC PE=1 SV=3	642	473749	47	31	46	30	13.1	3006	1	1	1	609.858	1217.7	2	1217.7	-0.0001	0	18.01	0.016	R	LLALNSLYSPK	I					Elution from: 63.1645 to 63.1645 RT Apex: 63.21 FinneganScanNumber: 18804
6	1	PRKDC_HUMAN	DNA-dependent protein kinase catalytic subunit OS=Homo sapiens OX=9606 GN=PRKDC PE=1 SV=3	642	473749	47	31	46	30	13.1	3096	1	1	1	618.324	1234.63	2	1234.65	-0.0111	0	0	1	R	QFINLMLPMK	E	Deamidated (NQ)	0.1000000000.0			Elution from: 78.6366 to 78.6366 RT Apex: 78.71 FinneganScanNumber: 24790
6	1	PRKDC_HUMAN	DNA-dependent protein kinase catalytic subunit OS=Homo sapiens OX=9606 GN=PRKDC PE=1 SV=3	642	473749	47	31	46	30	13.1	3581	1	1	1	653.841	1305.67	2	1305.66	0.0026	0	20.44	0.009	K	DILPCLDGYLK	T					Elution from: 82.4206 to 82.4206 RT Apex: 82.48 FinneganScanNumber: 26250
6	1	PRKDC_HUMAN	DNA-dependent protein kinase catalytic subunit OS=Homo sapiens OX=9606 GN=PRKDC PE=1 SV=3	642	473749	47	31	46	30	13.1	3622	1	1	1	656.329	1310.64	2	1310.64	0.0013	0	24.39	0.0036	R	YPEETLSLMTK	E					Elution from: 54.3102 to 54.3102 RT Apex: 54.39 FinneganScanNumber: 15353
6	1	PRKDC_HUMAN	DNA-dependent protein kinase catalytic subunit OS=Homo sapiens OX=9606 GN=PRKDC PE=1 SV=3	642	473749	47	31	46	30	13.1	3821	1	1	1	669.863	1337.71	2	1337.71	0.0021	0	19.48	0.011	R	LGASLAFNNIYR	E					Elution from: 61.1327 to 61.1327 RT Apex: 61.14 FinneganScanNumber: 17971
6	1	PRKDC_HUMAN	DNA-dependent protein kinase catalytic subunit OS=Homo sapiens OX=9606 GN=PRKDC PE=1 SV=3	642	473749	47	31	46	30	13.1	3824	1	1	1	670.386	1338.76	2	1338.75	0.0019	0	31.98	0.00063	K	QLFSSLFSGILK	E					Elution from: 91.7262 to 91.7262 RT Apex: 91.79 FinneganScanNumber: 29366
6	1	PRKDC_HUMAN	DNA-dependent protein kinase catalytic subunit OS=Homo sapiens OX=9606 GN=PRKDC PE=1 SV=3	642	473749	47	31	46	30	13.1	4778	1	1	1	724.874	1447.73	2	1447.73	0.0002	0	47.1	1.9e-05	R	SQGCSEQVLTVLK	T					Elution from: 49.9191 to 49.9191 RT Apex: 49.97 FinneganScanNumber: 13747
6	1	PRKDC_HUMAN	DNA-dependent protein kinase catalytic subunit OS=Homo sapiens OX=9606 GN=PRKDC PE=1 SV=3	642	473749	47	31	46	30	13.1	4919	1	1	1	734.854	1467.69	2	1467.69	-0.0011	0	35.47	0.00028	K	NLLTVTSSDEMMK	S					Elution from: 56.6058 to 56.6058 RT Apex: 56.61 FinneganScanNumber: 16258
6	1	PRKDC_HUMAN	DNA-dependent protein kinase catalytic subunit OS=Homo sapiens OX=9606 GN=PRKDC PE=1 SV=3	642	473749	47	31	46	30	13.1	5012	1	1	1	740.855	1479.7	2	1479.69	0.0022	0	29.85	0.001	R	ILELSGSSSEDSEK	V					Elution from: 37.1393 to 37.1393 RT Apex: 37.05 FinneganScanNumber: 9384
6	1	PRKDC_HUMAN	DNA-dependent protein kinase catalytic subunit OS=Homo sapiens OX=9606 GN=PRKDC PE=1 SV=3	642	473749	47	31	46	30	13.1	5370	1	1	1	759.399	1516.78	2	1516.78	0.0028	0	27.93	0.0016	K	NILEESLCELVAK	Q					Elution from: 82.1008 to 82.1008 RT Apex: 82.13 FinneganScanNumber: 26125
6	1	PRKDC_HUMAN	DNA-dependent protein kinase catalytic subunit OS=Homo sapiens OX=9606 GN=PRKDC PE=1 SV=3	642	473749	47	31	46	30	13.1	5865	1	1	1	787.905	1573.79	2	1573.79	-0.0001	0	76	2.5e-08	K	NLSSNEAISLEEIR	I					Elution from: 56.5025 to 56.5025 RT Apex: 56.55 FinneganScanNumber: 16218
6	1	PRKDC_HUMAN	DNA-dependent protein kinase catalytic subunit OS=Homo sapiens OX=9606 GN=PRKDC PE=1 SV=3	642	473749	47	31	46	30	13.1	6395	1	1	1	816.393	1630.77	2	1630.77	0.0025	0	38.44	0.00014	R	AQEPESGLSEETQVK	C					Elution from: 32.1815 to 32.1815 RT Apex: 32.32 FinneganScanNumber: 7802
6	1	PRKDC_HUMAN	DNA-dependent protein kinase catalytic subunit OS=Homo sapiens OX=9606 GN=PRKDC PE=1 SV=3	642	473749	47	31	46	30	13.1	6468	1	1	1	818.916	1635.82	2	1635.82	0.0002	0	35.05	0.00031	R	SDPGLLTNTMDVFVK	E					Elution from: 80.0980 to 80.0980 RT Apex: 80.15 FinneganScanNumber: 25350
6	1	PRKDC_HUMAN	DNA-dependent protein kinase catalytic subunit OS=Homo sapiens OX=9606 GN=PRKDC PE=1 SV=3	642	473749	47	31	46	30	13.1	6469	1	1	1	818.933	1635.85	2	1635.85	-0.0021	0	32.6	0.00055	K	LSDFNDITNMLLLK	M					Elution from: 94.2583 to 94.2583 RT Apex: 94.28 FinneganScanNumber: 30169
6	1	PRKDC_HUMAN	DNA-dependent protein kinase catalytic subunit OS=Homo sapiens OX=9606 GN=PRKDC PE=1 SV=3	642	473749	47	31	46	30	13.1	7405	1	1	1	867.405	1732.8	2	1732.79	0.0042	0	52.06	6.2e-06	K	MDPMNIWDDIITNR	C					Elution from: 97.2453 to 97.2453 RT Apex: 97.34 FinneganScanNumber: 31028
6	1	PRKDC_HUMAN	DNA-dependent protein kinase catalytic subunit OS=Homo sapiens OX=9606 GN=PRKDC PE=1 SV=3	642	473749	47	31	46	30	13.1	9016	1	1	1	632.297	1893.87	3	1893.87	0.0018	0	27.7	0.0017	R	EQQHVMEELFQSSFR	R					Elution from: 63.2991 to 63.2991 RT Apex: 63.35 FinneganScanNumber: 18859
6	1	PRKDC_HUMAN	DNA-dependent protein kinase catalytic subunit OS=Homo sapiens OX=9606 GN=PRKDC PE=1 SV=3	642	473749	47	31	46	30	13.1	9104	1	1	1	952.521	1903.03	2	1903.03	-0.0036	0	102.44	5.7e-11	K	LLLQGEADQSLLTFIDK	A					Elution from: 90.8343 to 90.8343 RT Apex: 90.87 FinneganScanNumber: 29090
6	1	PRKDC_HUMAN	DNA-dependent protein kinase catalytic subunit OS=Homo sapiens OX=9606 GN=PRKDC PE=1 SV=3	642	473749	47	31	46	30	13.1	9783	1	1	1	984.495	1966.98	2	1966.97	0.0046	0	57.05	2e-06	R	IMEFTTTLLNTSPEGWK	L					Elution from: 83.0274 to 83.0274 RT Apex: 83.10 FinneganScanNumber: 26481
6	1	PRKDC_HUMAN	DNA-dependent protein kinase catalytic subunit OS=Homo sapiens OX=9606 GN=PRKDC PE=1 SV=3	642	473749	47	31	46	30	13.1	10776	1	1	1	692.701	2075.08	3	2075.08	0.0039	0	20.2	0.0096	K	AVAFFLESIAMHDIIAAEK	C					Elution from: 92.0572 to 92.0572 RT Apex: 92.12 FinneganScanNumber: 29470
6	1	PRKDC_HUMAN	DNA-dependent protein kinase catalytic subunit OS=Homo sapiens OX=9606 GN=PRKDC PE=1 SV=3	642	473749	47	31	46	30	13.1	10848	1	1	1	695.687	2084.04	3	2084.04	0.0022	0	23.07	0.0049	R	ELLNPVVEFVSHPSTTCR	E					Elution from: 69.1187 to 69.1187 RT Apex: 69.07 FinneganScanNumber: 21117
6	1	PRKDC_HUMAN	DNA-dependent protein kinase catalytic subunit OS=Homo sapiens OX=9606 GN=PRKDC PE=1 SV=3	642	473749	47	31	46	30	13.1	10876	4	1	1	697.01	2088.01	3	2088.02	-0.0144	1	0.91	0.81	K	AALSALESFLKQVSNMVAK	N	2 Deamidated (NQ); Phospho (ST)	0.0000000300010010000.0			Elution from: 62.3528 to 62.3528 RT Apex: 62.40 FinneganScanNumber: 18471
6	1	PRKDC_HUMAN	DNA-dependent protein kinase catalytic subunit OS=Homo sapiens OX=9606 GN=PRKDC PE=1 SV=3	642	473749	47	31	46	30	13.1	11351	1	1	1	714	2138.98	3	2138.98	-0.0014	0	9.83	0.1	R	DPTVHDDVLELEMDELNR	H					Elution from: 73.1093 to 73.1093 RT Apex: 73.20 FinneganScanNumber: 22668
6	1	PRKDC_HUMAN	DNA-dependent protein kinase catalytic subunit OS=Homo sapiens OX=9606 GN=PRKDC PE=1 SV=3	642	473749	47	31	46	30	13.1	12945	1	1	1	766.35	2296.03	3	2296.03	0.0011	0	27.69	0.0017	K	DFWELASLDCYNHLAEWK	S					Elution from: 92.0414 to 92.0414 RT Apex: 92.15 FinneganScanNumber: 29465
6	1	PRKDC_HUMAN	DNA-dependent protein kinase catalytic subunit OS=Homo sapiens OX=9606 GN=PRKDC PE=1 SV=3	642	473749	47	31	46	30	13.1	13120	1	1	1	772.341	2314	3	2314	0.0001	0	24	0.004	K	LTPLPEDNSMNVDQDGDPSDR	M					Elution from: 53.3529 to 53.3529 RT Apex: 53.36 FinneganScanNumber: 14989
6	1	PRKDC_HUMAN	DNA-dependent protein kinase catalytic subunit OS=Homo sapiens OX=9606 GN=PRKDC PE=1 SV=3	642	473749	47	31	46	30	13.1	13121	1	1	1	1158.01	2314	2	2314	0.0027	0	52.44	5.7e-06	K	LTPLPEDNSMNVDQDGDPSDR	M					Elution from: 53.2751 to 53.2751 RT Apex: 53.33 FinneganScanNumber: 14958
6	1	PRKDC_HUMAN	DNA-dependent protein kinase catalytic subunit OS=Homo sapiens OX=9606 GN=PRKDC PE=1 SV=3	642	473749	47	31	46	30	13.1	14609	1	1	1	854.756	2561.25	3	2561.24	0.0021	0	59.3	1.2e-06	K	ITAQSIEELCAVNLYGPDAQVDR	S					Elution from: 77.2407 to 77.2407 RT Apex: 77.24 FinneganScanNumber: 24247
6	1	PRKDC_HUMAN	DNA-dependent protein kinase catalytic subunit OS=Homo sapiens OX=9606 GN=PRKDC PE=1 SV=3	642	473749	47	31	46	30	13.1	17328	1	1	1	809.387	3233.52	4	3233.52	0.0032	0	37.05	0.0002	R	SSFDWLTGSSTDPLVDHTSPSSDSLLFAHK	R					Elution from: 79.9439 to 79.9439 RT Apex: 80.00 FinneganScanNumber: 25293
Removing duplicates
NILAFR
QSFVDR
VPADLLK
TFPVLLR
LLNFLMK
SIELFYK
TETVTSFR
FYGELALK
LLPAELPAK
LLEEALLR
IPALDLLIK
DILETHLR
EIFNFVLK
GYGLFAGPCK
LQETLSAADR
AALSALESFLK
LGLPGDEVDNK
GKPLPEYHVR
LGNPIVPLNIR
LLALNSLYSPK
QFINLMLPMK
DILPCLDGYLK
YPEETLSLMTK
LGASLAFNNIYR
QLFSSLFSGILK
SQGCSEQVLTVLK
NLLTVTSSDEMMK
ILELSGSSSEDSEK
NILEESLCELVAK
NLSSNEAISLEEIR
AQEPESGLSEETQVK
SDPGLLTNTMDVFVK
LSDFNDITNMLLLK
MDPMNIWDDIITNR
EQQHVMEELFQSSFR
LLLQGEADQSLLTFIDK
IMEFTTTLLNTSPEGWK
AVAFFLESIAMHDIIAAEK
ELLNPVVEFVSHPSTTCR
AALSALESFLKQVSNMVAK
DPTVHDDVLELEMDELNR
DFWELASLDCYNHLAEWK
LTPLPEDNSMNVDQDGDPSDR
ITAQSIEELCAVNLYGPDAQVDR
SSFDWLTGSSTDPLVDHTSPSSDSLLFAHK

## Sheet: Fig 4D_EPHA2
prot_hit_num	prot_family_member	prot_acc	prot_desc	prot_score	prot_mass	prot_matches	prot_matches_sig	prot_sequences	prot_sequences_sig	prot_cover	pep_query	pep_rank	pep_isbold	pep_isunique	pep_exp_mz	pep_exp_mr	pep_exp_z	pep_calc_mr	pep_delta	pep_miss	pep_score	pep_expect	pep_res_before	pep_seq	pep_res_after	pep_var_mod	pep_var_mod_pos	pep_summed_mod_pos	pep_local_mod_pos	pep_scan_title
199	1	EPHA2_HUMAN	Ephrin type-A receptor 2 OS=Homo sapiens OX=9606 GN=EPHA2 PE=1 SV=2	28	109679	6	1	6	1	7.1	502	1	1	1	381.742	761.469	2	761.469	-0.0001	0	1.56	0.7	R	IFIELK	F					Elution from: 55.2784 to 55.2784 RT Apex: 55.26 FinneganScanNumber: 19183
199	1	EPHA2_HUMAN	Ephrin type-A receptor 2 OS=Homo sapiens OX=9606 GN=EPHA2 PE=1 SV=2	28	109679	6	1	6	1	7.1	3701	1	1	1	528.291	1054.57	2	1054.57	0.001	0	0.03	0.99	K	DQVNTVGIPI	-					Elution from: 81.1406 to 81.1406 RT Apex: 81.13 FinneganScanNumber: 30722
199	1	EPHA2_HUMAN	Ephrin type-A receptor 2 OS=Homo sapiens OX=9606 GN=EPHA2 PE=1 SV=2	28	109679	6	1	6	1	7.1	8174	1	1	1	693.774	1385.53	2	1385.53	0	0	10.88	0.082	R	DCNSFPGGASSCK	E					Elution from: 28.3293 to 28.3293 RT Apex: 28.26 FinneganScanNumber: 7310
199	1	EPHA2_HUMAN	Ephrin type-A receptor 2 OS=Homo sapiens OX=9606 GN=EPHA2 PE=1 SV=2	28	109679	6	1	6	1	7.1	9013	1	1	1	724.352	1446.69	2	1446.69	-0.0031	0	4.35	0.37	K	FTTEIHPSCVTR	Q					Elution from: 34.0885 to 34.0885 RT Apex: 34.06 FinneganScanNumber: 9659
199	1	EPHA2_HUMAN	Ephrin type-A receptor 2 OS=Homo sapiens OX=9606 GN=EPHA2 PE=1 SV=2	28	109679	6	1	6	1	7.1	9080	1	1	1	726.337	1450.66	2	1450.67	-0.0106	0	0	1	R	TASVSINQTEPPK	V	Phospho (ST)	0.0000000030000.0			Elution from: 99.2824 to 99.2824 RT Apex: 99.27 FinneganScanNumber: 36864
199	1	EPHA2_HUMAN	Ephrin type-A receptor 2 OS=Homo sapiens OX=9606 GN=EPHA2 PE=1 SV=2	28	109679	6	1	6	1	7.1	15971	1	1	1	663.991	1988.95	3	1988.95	0.002	0	28.28	0.0015	K	TYVDPHTYEDPNQAVLK	F					Elution from: 47.8479 to 47.8479 RT Apex: 47.89 FinneganScanNumber: 15707
Removing duplicates
IFIELK
DQVNTVGIPI
DCNSFPGGASSCK
FTTEIHPSCVTR
TASVSINQTEPPK
TYVDPHTYEDPNQAVLK

## Sheet: Fig 4D_PRKDC
prot_hit_num	prot_family_member	prot_acc	prot_desc	prot_score	prot_mass	prot_matches	prot_matches_sig	prot_sequences	prot_sequences_sig	prot_cover	pep_query	pep_rank	pep_isbold	pep_isunique	pep_exp_mz	pep_exp_mr	pep_exp_z	pep_calc_mr	pep_delta	pep_miss	pep_score	pep_expect	pep_res_before	pep_seq	pep_res_after	pep_var_mod	pep_var_mod_pos	pep_summed_mod_pos	pep_local_mod_pos	pep_scan_title
1	1	PRKDC_HUMAN	DNA-dependent protein kinase catalytic subunit OS=Homo sapiens OX=9606 GN=PRKDC PE=1 SV=3	12983	473749	663	475	246	192	62	12	1	1	1	350.71	699.405	2	699.407	-0.0016	0	1.55	0.7	K	FHGVLK	T					Elution from: 20.8994 to 20.8994 RT Apex: 20.95 FinneganScanNumber: 4197
1	1	PRKDC_HUMAN	DNA-dependent protein kinase catalytic subunit OS=Homo sapiens OX=9606 GN=PRKDC PE=1 SV=3	12983	473749	663	475	246	192	62	138	1	1	1	359.198	716.382	2	716.382	0.0004	0	9.5	0.11	K	NNITQK	L					Elution from: 15.2496 to 15.2496 RT Apex: 15.80 FinneganScanNumber: 2551
1	1	PRKDC_HUMAN	DNA-dependent protein kinase catalytic subunit OS=Homo sapiens OX=9606 GN=PRKDC PE=1 SV=3	12983	473749	663	475	246	192	62	139	1	1	1	359.198	716.382	2	716.382	0.0006	0	5.26	0.3	K	NNITQK	L					Elution from: 14.4901 to 14.4901 RT Apex: 15.80 FinneganScanNumber: 2411
1	1	PRKDC_HUMAN	DNA-dependent protein kinase catalytic subunit OS=Homo sapiens OX=9606 GN=PRKDC PE=1 SV=3	12983	473749	663	475	246	192	62	240	1	1	1	364.712	727.41	2	727.412	-0.0015	0	0.21	0.95	R	EILPEK	Q					Elution from: 28.6861 to 28.6861 RT Apex: 28.12 FinneganScanNumber: 7468
1	1	PRKDC_HUMAN	DNA-dependent protein kinase catalytic subunit OS=Homo sapiens OX=9606 GN=PRKDC PE=1 SV=3	12983	473749	663	475	246	192	62	241	1	1	1	364.713	727.412	2	727.412	0.0007	0	2.32	0.59	R	EILPEK	Q					Elution from: 27.9289 to 27.9289 RT Apex: 28.12 FinneganScanNumber: 7144
1	1	PRKDC_HUMAN	DNA-dependent protein kinase catalytic subunit OS=Homo sapiens OX=9606 GN=PRKDC PE=1 SV=3	12983	473749	663	475	246	192	62	269	1	1	1	367.205	732.395	2	732.395	0	0	15.99	0.025	K	CTVVVR	I					Elution from: 21.2417 to 21.2417 RT Apex: 21.32 FinneganScanNumber: 4337
1	1	PRKDC_HUMAN	DNA-dependent protein kinase catalytic subunit OS=Homo sapiens OX=9606 GN=PRKDC PE=1 SV=3	12983	473749	663	475	246	192	62	270	1	1	1	367.221	732.428	2	732.428	0	0	8.67	0.14	K	NILAFR	D					Elution from: 48.4172 to 48.4172 RT Apex: 48.56 FinneganScanNumber: 15983
1	1	PRKDC_HUMAN	DNA-dependent protein kinase catalytic subunit OS=Homo sapiens OX=9606 GN=PRKDC PE=1 SV=3	12983	473749	663	475	246	192	62	279	1	1	1	368.182	734.35	2	734.35	-0.0003	0	8.58	0.14	K	NWYPR	Q					Elution from: 33.3556 to 33.3556 RT Apex: 33.33 FinneganScanNumber: 9354
1	1	PRKDC_HUMAN	DNA-dependent protein kinase catalytic subunit OS=Homo sapiens OX=9606 GN=PRKDC PE=1 SV=3	12983	473749	663	475	246	192	62	280	1	1	1	368.182	734.35	2	734.35	-0.0001	0	8.47	0.14	K	NWYPR	Q					Elution from: 31.2445 to 31.2445 RT Apex: 31.42 FinneganScanNumber: 8530
1	1	PRKDC_HUMAN	DNA-dependent protein kinase catalytic subunit OS=Homo sapiens OX=9606 GN=PRKDC PE=1 SV=3	12983	473749	663	475	246	192	62	287	1	1	1	368.674	735.334	2	735.334	-0.0004	0	1.05	0.79	K	NWYPR	Q	Deamidated (NQ)	0.10000.0			Elution from: 45.3219 to 45.3219 RT Apex: 45.41 FinneganScanNumber: 14471
1	1	PRKDC_HUMAN	DNA-dependent protein kinase catalytic subunit OS=Homo sapiens OX=9606 GN=PRKDC PE=1 SV=3	12983	473749	663	475	246	192	62	288	1	1	1	368.674	735.334	2	735.334	0.0002	0	1.83	0.66	K	NWYPR	Q	Deamidated (NQ)	0.10000.0			Elution from: 39.5687 to 39.5687 RT Apex: 39.70 FinneganScanNumber: 11905
1	1	PRKDC_HUMAN	DNA-dependent protein kinase catalytic subunit OS=Homo sapiens OX=9606 GN=PRKDC PE=1 SV=3	12983	473749	663	475	246	192	62	304	1	1	1	369.729	737.443	2	737.444	-0.0005	0	4.08	0.39	K	LDLHLK	G					Elution from: 34.9306 to 34.9306 RT Apex: 34.95 FinneganScanNumber: 10013
1	1	PRKDC_HUMAN	DNA-dependent protein kinase catalytic subunit OS=Homo sapiens OX=9606 GN=PRKDC PE=1 SV=3	12983	473749	663	475	246	192	62	339	1	1	1	373.216	744.417	2	744.417	0.0004	0	6.44	0.23	R	WVELAK	L					Elution from: 37.6014 to 37.6014 RT Apex: 37.72 FinneganScanNumber: 11113
1	1	PRKDC_HUMAN	DNA-dependent protein kinase catalytic subunit OS=Homo sapiens OX=9606 GN=PRKDC PE=1 SV=3	12983	473749	663	475	246	192	62	380	1	1	1	376.191	750.367	2	750.366	0.001	0	11.71	0.067	R	QSFVDR	S					Elution from: 22.5089 to 22.5089 RT Apex: 22.31 FinneganScanNumber: 4868
1	1	PRKDC_HUMAN	DNA-dependent protein kinase catalytic subunit OS=Homo sapiens OX=9606 GN=PRKDC PE=1 SV=3	12983	473749	663	475	246	192	62	408	1	1	1	378.235	754.456	2	754.459	-0.0026	0	3.45	0.45	K	VPADLLK	R					Elution from: 40.7717 to 40.7717 RT Apex: 39.78 FinneganScanNumber: 12369
1	1	PRKDC_HUMAN	DNA-dependent protein kinase catalytic subunit OS=Homo sapiens OX=9606 GN=PRKDC PE=1 SV=3	12983	473749	663	475	246	192	62	409	1	1	1	378.237	754.459	2	754.459	0.0002	0	5.3	0.3	K	VPADLLK	R					Elution from: 39.1993 to 39.1993 RT Apex: 39.44 FinneganScanNumber: 11745
1	1	PRKDC_HUMAN	DNA-dependent protein kinase catalytic subunit OS=Homo sapiens OX=9606 GN=PRKDC PE=1 SV=3	12983	473749	663	475	246	192	62	410	1	1	1	378.238	754.461	2	754.459	0.0018	0	7.7	0.17	K	VPADLLK	R					Elution from: 39.9593 to 39.9593 RT Apex: 39.44 FinneganScanNumber: 12071
1	1	PRKDC_HUMAN	DNA-dependent protein kinase catalytic subunit OS=Homo sapiens OX=9606 GN=PRKDC PE=1 SV=3	12983	473749	663	475	246	192	62	527	1	1	1	382.714	763.413	2	763.413	-0.0001	0	1.47	0.71	K	HVFHPK	R					Elution from: 15.0486 to 15.0486 RT Apex: 14.47 FinneganScanNumber: 2510
1	1	PRKDC_HUMAN	DNA-dependent protein kinase catalytic subunit OS=Homo sapiens OX=9606 GN=PRKDC PE=1 SV=3	12983	473749	663	475	246	192	62	528	1	1	1	382.714	763.413	2	763.413	0.0003	0	6.09	0.25	K	HVFHPK	R					Elution from: 14.2874 to 14.2874 RT Apex: 14.47 FinneganScanNumber: 2367
1	1	PRKDC_HUMAN	DNA-dependent protein kinase catalytic subunit OS=Homo sapiens OX=9606 GN=PRKDC PE=1 SV=3	12983	473749	663	475	246	192	62	613	1	1	1	389.229	776.443	2	776.443	-0.0002	0	0	1	R	AFLGELK	T					Elution from: 47.4881 to 47.4881 RT Apex: 46.78 FinneganScanNumber: 15522
1	1	PRKDC_HUMAN	DNA-dependent protein kinase catalytic subunit OS=Homo sapiens OX=9606 GN=PRKDC PE=1 SV=3	12983	473749	663	475	246	192	62	614	1	1	1	389.229	776.443	2	776.443	0.0002	0	0.67	0.86	R	AFLGELK	T					Elution from: 46.6620 to 46.6620 RT Apex: 46.78 FinneganScanNumber: 15107
1	1	PRKDC_HUMAN	DNA-dependent protein kinase catalytic subunit OS=Homo sapiens OX=9606 GN=PRKDC PE=1 SV=3	12983	473749	663	475	246	192	62	615	1	1	1	389.233	776.452	2	776.455	-0.0028	0	3.84	0.41	K	LLQTFR	S					Elution from: 37.0591 to 37.0591 RT Apex: 36.43 FinneganScanNumber: 10937
1	1	PRKDC_HUMAN	DNA-dependent protein kinase catalytic subunit OS=Homo sapiens OX=9606 GN=PRKDC PE=1 SV=3	12983	473749	663	475	246	192	62	616	1	1	1	389.234	776.454	2	776.455	-0.0008	0	5.95	0.25	K	LLQTFR	S					Elution from: 36.2984 to 36.2984 RT Apex: 36.43 FinneganScanNumber: 10600
1	1	PRKDC_HUMAN	DNA-dependent protein kinase catalytic subunit OS=Homo sapiens OX=9606 GN=PRKDC PE=1 SV=3	12983	473749	663	475	246	192	62	640	1	1	1	391.689	781.364	2	781.368	-0.0038	0	1.14	0.77	R	LMDEFK	I					Elution from: 37.4546 to 37.4546 RT Apex: 37.64 FinneganScanNumber: 11067
1	1	PRKDC_HUMAN	DNA-dependent protein kinase catalytic subunit OS=Homo sapiens OX=9606 GN=PRKDC PE=1 SV=3	12983	473749	663	475	246	192	62	641	1	1	1	391.691	781.368	2	781.368	0.0002	0	2	0.63	R	LMDEFK	I					Elution from: 38.2961 to 38.2961 RT Apex: 37.64 FinneganScanNumber: 11383
1	1	PRKDC_HUMAN	DNA-dependent protein kinase catalytic subunit OS=Homo sapiens OX=9606 GN=PRKDC PE=1 SV=3	12983	473749	663	475	246	192	62	697	1	1	1	394.724	787.433	2	787.434	-0.0012	0	15.09	0.031	K	APGLGAFR	R					Elution from: 40.8541 to 40.8541 RT Apex: 39.90 FinneganScanNumber: 12404
1	1	PRKDC_HUMAN	DNA-dependent protein kinase catalytic subunit OS=Homo sapiens OX=9606 GN=PRKDC PE=1 SV=3	12983	473749	663	475	246	192	62	698	1	1	1	394.724	787.434	2	787.434	-0.0004	0	0.38	0.92	K	APGLGAFR	R					Elution from: 41.9213 to 41.9213 RT Apex: 40.95 FinneganScanNumber: 12866
1	1	PRKDC_HUMAN	DNA-dependent protein kinase catalytic subunit OS=Homo sapiens OX=9606 GN=PRKDC PE=1 SV=3	12983	473749	663	475	246	192	62	699	1	1	1	394.725	787.436	2	787.434	0.0016	0	16.06	0.025	K	APGLGAFR	R					Elution from: 39.8139 to 39.8139 RT Apex: 39.90 FinneganScanNumber: 12019
1	1	PRKDC_HUMAN	DNA-dependent protein kinase catalytic subunit OS=Homo sapiens OX=9606 GN=PRKDC PE=1 SV=3	12983	473749	663	475	246	192	62	705	1	1	1	395.203	788.391	2	788.392	-0.0003	0	11.7	0.068	K	DSPLETK	M					Elution from: 22.9666 to 22.9666 RT Apex: 23.02 FinneganScanNumber: 5083
1	1	PRKDC_HUMAN	DNA-dependent protein kinase catalytic subunit OS=Homo sapiens OX=9606 GN=PRKDC PE=1 SV=3	12983	473749	663	475	246	192	62	751	1	1	1	397.214	792.413	2	792.413	-0.0001	0	4.79	0.33	R	DYVAVAR	G					Elution from: 30.9971 to 30.9971 RT Apex: 30.40 FinneganScanNumber: 8411
1	1	PRKDC_HUMAN	DNA-dependent protein kinase catalytic subunit OS=Homo sapiens OX=9606 GN=PRKDC PE=1 SV=3	12983	473749	663	475	246	192	62	754	1	1	1	397.215	792.415	2	792.413	0.0019	0	6.95	0.2	R	DYVAVAR	G					Elution from: 30.2439 to 30.2439 RT Apex: 30.40 FinneganScanNumber: 8081
1	1	PRKDC_HUMAN	DNA-dependent protein kinase catalytic subunit OS=Homo sapiens OX=9606 GN=PRKDC PE=1 SV=3	12983	473749	663	475	246	192	62	755	1	1	1	397.226	792.438	2	792.438	-0.0003	0	22.52	0.0056	K	IGELFSK	F					Elution from: 43.0690 to 43.0690 RT Apex: 42.83 FinneganScanNumber: 13394
1	1	PRKDC_HUMAN	DNA-dependent protein kinase catalytic subunit OS=Homo sapiens OX=9606 GN=PRKDC PE=1 SV=3	12983	473749	663	475	246	192	62	788	1	1	1	399.689	797.363	2	797.363	-0.0001	0	0	1	R	LMDEFK	I	Oxidation (M)	0.020000.0			Elution from: 26.0799 to 26.0799 RT Apex: 26.33 FinneganScanNumber: 6415
1	1	PRKDC_HUMAN	DNA-dependent protein kinase catalytic subunit OS=Homo sapiens OX=9606 GN=PRKDC PE=1 SV=3	12983	473749	663	475	246	192	62	822	1	1	1	401.202	800.389	2	800.389	0.0003	0	2.95	0.51	R	CFFLSK	I					Elution from: 48.0221 to 48.0221 RT Apex: 48.15 FinneganScanNumber: 15793
1	1	PRKDC_HUMAN	DNA-dependent protein kinase catalytic subunit OS=Homo sapiens OX=9606 GN=PRKDC PE=1 SV=3	12983	473749	663	475	246	192	62	828	1	1	1	401.245	800.476	2	800.476	0.0001	0	6.4	0.23	K	ELSIAIR	G					Elution from: 47.6131 to 47.6131 RT Apex: 47.41 FinneganScanNumber: 15580
1	1	PRKDC_HUMAN	DNA-dependent protein kinase catalytic subunit OS=Homo sapiens OX=9606 GN=PRKDC PE=1 SV=3	12983	473749	663	475	246	192	62	831	1	1	1	401.263	800.512	2	800.512	-0.0003	0	5.04	0.31	K	LLSITVR	N					Elution from: 49.2878 to 49.2878 RT Apex: 48.68 FinneganScanNumber: 16394
1	1	PRKDC_HUMAN	DNA-dependent protein kinase catalytic subunit OS=Homo sapiens OX=9606 GN=PRKDC PE=1 SV=3	12983	473749	663	475	246	192	62	832	1	1	1	401.263	800.512	2	800.512	0.0001	0	4.45	0.36	K	LLSITVR	N					Elution from: 48.5315 to 48.5315 RT Apex: 48.68 FinneganScanNumber: 16035
1	1	PRKDC_HUMAN	DNA-dependent protein kinase catalytic subunit OS=Homo sapiens OX=9606 GN=PRKDC PE=1 SV=3	12983	473749	663	475	246	192	62	844	1	1	1	402.204	802.393	2	802.393	-0.0002	0	10.15	0.097	K	LNSNEAR	L					Elution from: 15.9846 to 15.9846 RT Apex: 16.06 FinneganScanNumber: 2701
1	1	PRKDC_HUMAN	DNA-dependent protein kinase catalytic subunit OS=Homo sapiens OX=9606 GN=PRKDC PE=1 SV=3	12983	473749	663	475	246	192	62	865	1	1	1	403.705	805.396	2	805.397	-0.0006	0	16.16	0.024	K	SVGPDFGK	K					Elution from: 30.4211 to 30.4211 RT Apex: 30.55 FinneganScanNumber: 8160
1	1	PRKDC_HUMAN	DNA-dependent protein kinase catalytic subunit OS=Homo sapiens OX=9606 GN=PRKDC PE=1 SV=3	12983	473749	663	475	246	192	62	866	1	1	1	403.706	805.397	2	805.397	0	0	15.97	0.025	K	SVGPDFGK	K					Elution from: 31.1733 to 31.1733 RT Apex: 30.55 FinneganScanNumber: 8491
1	1	PRKDC_HUMAN	DNA-dependent protein kinase catalytic subunit OS=Homo sapiens OX=9606 GN=PRKDC PE=1 SV=3	12983	473749	663	475	246	192	62	877	3	1	1	404.203	806.391	2	806.392	-0.0016	0	4.21	0.38	R	IAGFDER	V					Elution from: 33.1700 to 33.1700 RT Apex: 32.59 FinneganScanNumber: 9276
1	1	PRKDC_HUMAN	DNA-dependent protein kinase catalytic subunit OS=Homo sapiens OX=9606 GN=PRKDC PE=1 SV=3	12983	473749	663	475	246	192	62	878	1	1	1	404.203	806.392	2	806.392	-0.0002	0	17.14	0.019	R	IAGFDER	V					Elution from: 32.4167 to 32.4167 RT Apex: 32.59 FinneganScanNumber: 8976
1	1	PRKDC_HUMAN	DNA-dependent protein kinase catalytic subunit OS=Homo sapiens OX=9606 GN=PRKDC PE=1 SV=3	12983	473749	663	475	246	192	62	901	1	1	1	405.247	808.48	2	808.481	-0.0008	0	15.63	0.027	R	LPPDVLR	W					Elution from: 42.4873 to 42.4873 RT Apex: 42.31 FinneganScanNumber: 13118
1	1	PRKDC_HUMAN	DNA-dependent protein kinase catalytic subunit OS=Homo sapiens OX=9606 GN=PRKDC PE=1 SV=3	12983	473749	663	475	246	192	62	902	1	1	1	405.248	808.481	2	808.481	0	0	11.64	0.069	R	LPPDVLR	W					Elution from: 43.2455 to 43.2455 RT Apex: 42.31 FinneganScanNumber: 13474
1	1	PRKDC_HUMAN	DNA-dependent protein kinase catalytic subunit OS=Homo sapiens OX=9606 GN=PRKDC PE=1 SV=3	12983	473749	663	475	246	192	62	903	1	1	1	405.248	808.482	2	808.481	0.0018	0	6	0.25	R	LPPDVLR	W					Elution from: 41.7280 to 41.7280 RT Apex: 42.31 FinneganScanNumber: 12779
1	1	PRKDC_HUMAN	DNA-dependent protein kinase catalytic subunit OS=Homo sapiens OX=9606 GN=PRKDC PE=1 SV=3	12983	473749	663	475	246	192	62	940	1	1	1	407.706	813.398	2	813.398	0	0	22.5	0.0056	K	GIAPGDER	Q					Elution from: 19.6800 to 19.6800 RT Apex: 19.79 FinneganScanNumber: 3738
1	1	PRKDC_HUMAN	DNA-dependent protein kinase catalytic subunit OS=Homo sapiens OX=9606 GN=PRKDC PE=1 SV=3	12983	473749	663	475	246	192	62	972	1	1	1	408.715	815.415	2	815.414	0.0009	0	9.74	0.11	K	DEVLANR	L					Elution from: 23.2450 to 23.2450 RT Apex: 23.10 FinneganScanNumber: 5196
1	1	PRKDC_HUMAN	DNA-dependent protein kinase catalytic subunit OS=Homo sapiens OX=9606 GN=PRKDC PE=1 SV=3	12983	473749	663	475	246	192	62	1001	1	1	1	411.247	820.48	2	820.481	-0.0008	1	12.72	0.053	K	KYIEIR	K					Elution from: 23.6506 to 23.6506 RT Apex: 23.73 FinneganScanNumber: 5373
1	1	PRKDC_HUMAN	DNA-dependent protein kinase catalytic subunit OS=Homo sapiens OX=9606 GN=PRKDC PE=1 SV=3	12983	473749	663	475	246	192	62	1136	1	1	1	416.768	831.521	2	831.522	-0.001	0	21.76	0.0067	K	VFLALAAK	G					Elution from: 54.7823 to 54.7823 RT Apex: 54.19 FinneganScanNumber: 18946
1	1	PRKDC_HUMAN	DNA-dependent protein kinase catalytic subunit OS=Homo sapiens OX=9606 GN=PRKDC PE=1 SV=3	12983	473749	663	475	246	192	62	1137	1	1	1	416.768	831.522	2	831.522	0.0004	0	25.8	0.0026	K	VFLALAAK	G					Elution from: 54.0271 to 54.0271 RT Apex: 54.19 FinneganScanNumber: 18581
1	1	PRKDC_HUMAN	DNA-dependent protein kinase catalytic subunit OS=Homo sapiens OX=9606 GN=PRKDC PE=1 SV=3	12983	473749	663	475	246	192	62	1138	1	1	1	416.769	831.522	2	831.522	0.0006	0	14.25	0.038	K	VFLALAAK	G					Elution from: 55.5612 to 55.5612 RT Apex: 54.58 FinneganScanNumber: 19327
1	1	PRKDC_HUMAN	DNA-dependent protein kinase catalytic subunit OS=Homo sapiens OX=9606 GN=PRKDC PE=1 SV=3	12983	473749	663	475	246	192	62	1251	1	1	1	423.265	844.516	2	844.517	-0.0006	0	18.47	0.014	R	TFPVLLR	L					Elution from: 61.4506 to 61.4506 RT Apex: 60.89 FinneganScanNumber: 22143
1	1	PRKDC_HUMAN	DNA-dependent protein kinase catalytic subunit OS=Homo sapiens OX=9606 GN=PRKDC PE=1 SV=3	12983	473749	663	475	246	192	62	1252	1	1	1	423.266	844.517	2	844.517	-0.0002	0	6.2	0.24	R	TFPVLLR	L					Elution from: 60.6947 to 60.6947 RT Apex: 60.89 FinneganScanNumber: 21788
1	1	PRKDC_HUMAN	DNA-dependent protein kinase catalytic subunit OS=Homo sapiens OX=9606 GN=PRKDC PE=1 SV=3	12983	473749	663	475	246	192	62	1253	1	1	1	423.266	844.517	2	844.517	-0.0002	0	6.96	0.2	R	TFPVLLR	L					Elution from: 62.2026 to 62.2026 RT Apex: 61.24 FinneganScanNumber: 22485
1	1	PRKDC_HUMAN	DNA-dependent protein kinase catalytic subunit OS=Homo sapiens OX=9606 GN=PRKDC PE=1 SV=3	12983	473749	663	475	246	192	62	1341	1	1	1	427.234	852.453	2	852.453	-0.0001	0	9.45	0.11	K	LSLMYAR	K					Elution from: 46.4771 to 46.4771 RT Apex: 46.62 FinneganScanNumber: 15020
1	1	PRKDC_HUMAN	DNA-dependent protein kinase catalytic subunit OS=Homo sapiens OX=9606 GN=PRKDC PE=1 SV=3	12983	473749	663	475	246	192	62	1351	1	1	1	427.776	853.538	2	853.538	-0.0003	0	11.08	0.078	K	LKPVELR	E					Elution from: 25.6711 to 25.6711 RT Apex: 25.79 FinneganScanNumber: 6244
1	1	PRKDC_HUMAN	DNA-dependent protein kinase catalytic subunit OS=Homo sapiens OX=9606 GN=PRKDC PE=1 SV=3	12983	473749	663	475	246	192	62	1352	1	1	1	427.776	853.538	2	853.538	-0.0001	0	0	1	K	LKPVELR	E					Elution from: 26.4302 to 26.4302 RT Apex: 25.79 FinneganScanNumber: 6552
1	1	PRKDC_HUMAN	DNA-dependent protein kinase catalytic subunit OS=Homo sapiens OX=9606 GN=PRKDC PE=1 SV=3	12983	473749	663	475	246	192	62	1387	1	1	1	429.248	856.48	2	856.481	-0.0002	0	11.19	0.076	R	SPNLWLK	D					Elution from: 48.7262 to 48.7262 RT Apex: 48.92 FinneganScanNumber: 16121
1	1	PRKDC_HUMAN	DNA-dependent protein kinase catalytic subunit OS=Homo sapiens OX=9606 GN=PRKDC PE=1 SV=3	12983	473749	663	475	246	192	62	1397	1	1	1	429.739	857.464	2	857.465	-0.001	0	0.84	0.82	R	SPNLWLK	D	Deamidated (NQ)	0.0010000.0			Elution from: 53.1493 to 53.1493 RT Apex: 53.14 FinneganScanNumber: 18263
1	1	PRKDC_HUMAN	DNA-dependent protein kinase catalytic subunit OS=Homo sapiens OX=9606 GN=PRKDC PE=1 SV=3	12983	473749	663	475	246	192	62	1453	1	1	1	432.7	863.385	2	863.385	0.0003	0	0.34	0.92	R	APPCEYK	D					Elution from: 16.3474 to 16.3474 RT Apex: 16.14 FinneganScanNumber: 2889
1	1	PRKDC_HUMAN	DNA-dependent protein kinase catalytic subunit OS=Homo sapiens OX=9606 GN=PRKDC PE=1 SV=3	12983	473749	663	475	246	192	62	1475	1	1	1	433.758	865.501	2	865.502	-0.0011	0	3.54	0.44	R	HNLEIIK	T					Elution from: 27.5667 to 27.5667 RT Apex: 27.64 FinneganScanNumber: 6985
1	1	PRKDC_HUMAN	DNA-dependent protein kinase catalytic subunit OS=Homo sapiens OX=9606 GN=PRKDC PE=1 SV=3	12983	473749	663	475	246	192	62	1513	1	1	1	435.23	868.446	2	868.448	-0.0014	0	3.73	0.42	K	LSLMYAR	K	Oxidation (M)	0.0002000.0			Elution from: 38.0541 to 38.0541 RT Apex: 38.24 FinneganScanNumber: 11279
1	1	PRKDC_HUMAN	DNA-dependent protein kinase catalytic subunit OS=Homo sapiens OX=9606 GN=PRKDC PE=1 SV=3	12983	473749	663	475	246	192	62	1585	1	1	1	438.718	875.421	2	875.421	-0.0003	0	5.85	0.26	R	DLPSWMK	F					Elution from: 60.2318 to 60.2318 RT Apex: 59.66 FinneganScanNumber: 21586
1	1	PRKDC_HUMAN	DNA-dependent protein kinase catalytic subunit OS=Homo sapiens OX=9606 GN=PRKDC PE=1 SV=3	12983	473749	663	475	246	192	62	1586	1	1	1	438.718	875.422	2	875.421	0.0011	0	8.39	0.14	R	DLPSWMK	F					Elution from: 59.4676 to 59.4676 RT Apex: 59.66 FinneganScanNumber: 21223
1	1	PRKDC_HUMAN	DNA-dependent protein kinase catalytic subunit OS=Homo sapiens OX=9606 GN=PRKDC PE=1 SV=3	12983	473749	663	475	246	192	62	1590	1	1	1	438.75	875.486	2	875.49	-0.004	0	8.89	0.13	R	VTVMASLR	R					Elution from: 40.5002 to 40.5002 RT Apex: 41.28 FinneganScanNumber: 12261
1	1	PRKDC_HUMAN	DNA-dependent protein kinase catalytic subunit OS=Homo sapiens OX=9606 GN=PRKDC PE=1 SV=3	12983	473749	663	475	246	192	62	1591	1	1	1	438.752	875.488	2	875.49	-0.0014	0	3.06	0.49	R	VTVMASLR	R					Elution from: 42.3988 to 42.3988 RT Apex: 41.40 FinneganScanNumber: 13079
1	1	PRKDC_HUMAN	DNA-dependent protein kinase catalytic subunit OS=Homo sapiens OX=9606 GN=PRKDC PE=1 SV=3	12983	473749	663	475	246	192	62	1592	1	1	1	438.752	875.489	2	875.49	-0.001	0	26.34	0.0023	R	VTVMASLR	R					Elution from: 41.2623 to 41.2623 RT Apex: 41.28 FinneganScanNumber: 12567
1	1	PRKDC_HUMAN	DNA-dependent protein kinase catalytic subunit OS=Homo sapiens OX=9606 GN=PRKDC PE=1 SV=3	12983	473749	663	475	246	192	62	1614	1	1	1	439.261	876.508	2	876.507	0.0008	1	0.05	0.99	K	FGKEVAVK	M					Elution from: 20.0357 to 20.0357 RT Apex: 20.02 FinneganScanNumber: 3869
1	1	PRKDC_HUMAN	DNA-dependent protein kinase catalytic subunit OS=Homo sapiens OX=9606 GN=PRKDC PE=1 SV=3	12983	473749	663	475	246	192	62	1622	1	1	1	439.762	877.509	2	877.51	-0.0007	0	11.1	0.078	R	LLNFLMK	H					Elution from: 67.7643 to 67.7643 RT Apex: 67.12 FinneganScanNumber: 25039
1	1	PRKDC_HUMAN	DNA-dependent protein kinase catalytic subunit OS=Homo sapiens OX=9606 GN=PRKDC PE=1 SV=3	12983	473749	663	475	246	192	62	1623	1	1	1	439.762	877.509	2	877.51	-0.0001	0	20.1	0.0098	R	LLNFLMK	H					Elution from: 67.0003 to 67.0003 RT Apex: 67.12 FinneganScanNumber: 24664
1	1	PRKDC_HUMAN	DNA-dependent protein kinase catalytic subunit OS=Homo sapiens OX=9606 GN=PRKDC PE=1 SV=3	12983	473749	663	475	246	192	62	1631	1	1	1	440.253	878.492	2	878.494	-0.0011	0	12.76	0.053	R	LLNFLMK	H	Deamidated (NQ)	0.0010000.0			Elution from: 68.1135 to 68.1135 RT Apex: 68.12 FinneganScanNumber: 25193
1	1	PRKDC_HUMAN	DNA-dependent protein kinase catalytic subunit OS=Homo sapiens OX=9606 GN=PRKDC PE=1 SV=3	12983	473749	663	475	246	192	62	1681	1	1	1	442.782	883.549	2	883.549	-0.0002	0	12.66	0.054	R	LLQIIER	Y					Elution from: 51.8649 to 51.8649 RT Apex: 50.89 FinneganScanNumber: 17665
1	1	PRKDC_HUMAN	DNA-dependent protein kinase catalytic subunit OS=Homo sapiens OX=9606 GN=PRKDC PE=1 SV=3	12983	473749	663	475	246	192	62	1682	1	1	1	442.782	883.549	2	883.549	0.0002	0	12.34	0.058	R	LLQIIER	Y					Elution from: 50.1892 to 50.1892 RT Apex: 50.34 FinneganScanNumber: 16861
1	1	PRKDC_HUMAN	DNA-dependent protein kinase catalytic subunit OS=Homo sapiens OX=9606 GN=PRKDC PE=1 SV=3	12983	473749	663	475	246	192	62	1683	1	1	1	442.782	883.549	2	883.549	0.0002	0	20.21	0.0095	R	LLQIIER	Y					Elution from: 50.9481 to 50.9481 RT Apex: 50.34 FinneganScanNumber: 17219
1	1	PRKDC_HUMAN	DNA-dependent protein kinase catalytic subunit OS=Homo sapiens OX=9606 GN=PRKDC PE=1 SV=3	12983	473749	663	475	246	192	62	1723	1	1	1	446.201	890.388	2	890.388	-0.0004	0	8.21	0.15	K	DWSNDVR	A					Elution from: 32.7383 to 32.7383 RT Apex: 32.86 FinneganScanNumber: 9105
1	1	PRKDC_HUMAN	DNA-dependent protein kinase catalytic subunit OS=Homo sapiens OX=9606 GN=PRKDC PE=1 SV=3	12983	473749	663	475	246	192	62	1727	1	1	1	446.693	891.372	2	891.372	-0.0002	0	0.38	0.92	K	DWSNDVR	A	Deamidated (NQ)	0.0001000.0			Elution from: 37.8777 to 37.8777 RT Apex: 37.96 FinneganScanNumber: 11215
1	1	PRKDC_HUMAN	DNA-dependent protein kinase catalytic subunit OS=Homo sapiens OX=9606 GN=PRKDC PE=1 SV=3	12983	473749	663	475	246	192	62	1728	1	1	1	446.694	891.373	2	891.372	0.0006	0	5.01	0.32	K	DWSNDVR	A	Deamidated (NQ)	0.0001000.0			Elution from: 30.2191 to 30.2191 RT Apex: 30.31 FinneganScanNumber: 8072
1	1	PRKDC_HUMAN	DNA-dependent protein kinase catalytic subunit OS=Homo sapiens OX=9606 GN=PRKDC PE=1 SV=3	12983	473749	663	475	246	192	62	1732	1	1	1	446.73	891.446	2	891.445	0.0008	0	17.8	0.017	K	AAYLSDPR	A					Elution from: 28.5100 to 28.5100 RT Apex: 28.69 FinneganScanNumber: 7396
1	1	PRKDC_HUMAN	DNA-dependent protein kinase catalytic subunit OS=Homo sapiens OX=9606 GN=PRKDC PE=1 SV=3	12983	473749	663	475	246	192	62	1740	1	1	1	447.229	892.443	2	892.444	-0.0002	0	15.16	0.031	K	TQMTSAVR	E					Elution from: 19.7866 to 19.7866 RT Apex: 19.83 FinneganScanNumber: 3775
1	1	PRKDC_HUMAN	DNA-dependent protein kinase catalytic subunit OS=Homo sapiens OX=9606 GN=PRKDC PE=1 SV=3	12983	473749	663	475	246	192	62	1741	1	1	1	447.249	892.484	2	892.484	0.0002	0	2.41	0.57	K	FIVCLNK	V					Elution from: 49.9731 to 49.9731 RT Apex: 49.50 FinneganScanNumber: 16754
1	1	PRKDC_HUMAN	DNA-dependent protein kinase catalytic subunit OS=Homo sapiens OX=9606 GN=PRKDC PE=1 SV=3	12983	473749	663	475	246	192	62	1747	1	1	1	447.729	893.443	2	893.443	0.0003	0	3.48	0.45	K	DFVQVMR	H					Elution from: 50.1131 to 50.1131 RT Apex: 50.22 FinneganScanNumber: 16822
1	1	PRKDC_HUMAN	DNA-dependent protein kinase catalytic subunit OS=Homo sapiens OX=9606 GN=PRKDC PE=1 SV=3	12983	473749	663	475	246	192	62	1750	1	1	1	447.759	893.504	2	893.504	-0.0006	0	6.9	0.2	R	LLNFLMK	H	Oxidation (M)	0.0000020.0			Elution from: 58.7811 to 58.7811 RT Apex: 58.84 FinneganScanNumber: 20903
1	1	PRKDC_HUMAN	DNA-dependent protein kinase catalytic subunit OS=Homo sapiens OX=9606 GN=PRKDC PE=1 SV=3	12983	473749	663	475	246	192	62	1751	1	1	1	447.76	893.505	2	893.504	0.0004	0	0.14	0.97	R	LLNFLMK	H	Oxidation (M)	0.0000020.0			Elution from: 59.8694 to 59.8694 RT Apex: 60.46 FinneganScanNumber: 21415
1	1	PRKDC_HUMAN	DNA-dependent protein kinase catalytic subunit OS=Homo sapiens OX=9606 GN=PRKDC PE=1 SV=3	12983	473749	663	475	246	192	62	1752	1	1	1	447.76	893.505	2	893.504	0.0008	0	7.17	0.19	R	LLNFLMK	H	Oxidation (M)	0.0000020.0			Elution from: 60.6748 to 60.6748 RT Apex: 60.46 FinneganScanNumber: 21782
1	1	PRKDC_HUMAN	DNA-dependent protein kinase catalytic subunit OS=Homo sapiens OX=9606 GN=PRKDC PE=1 SV=3	12983	473749	663	475	246	192	62	1769	1	1	1	448.716	895.418	2	895.419	-0.0004	0	13.68	0.043	K	SYVAWDR	E					Elution from: 38.3297 to 38.3297 RT Apex: 38.47 FinneganScanNumber: 11395
1	1	PRKDC_HUMAN	DNA-dependent protein kinase catalytic subunit OS=Homo sapiens OX=9606 GN=PRKDC PE=1 SV=3	12983	473749	663	475	246	192	62	1770	1	1	1	448.717	895.419	2	895.419	0.0002	0	12.17	0.061	K	SYVAWDR	E					Elution from: 39.0961 to 39.0961 RT Apex: 38.47 FinneganScanNumber: 11701
1	1	PRKDC_HUMAN	DNA-dependent protein kinase catalytic subunit OS=Homo sapiens OX=9606 GN=PRKDC PE=1 SV=3	12983	473749	663	475	246	192	62	1808	1	1	1	450.247	898.48	2	898.48	-0.0003	0	11.96	0.064	K	SIELFYK	F					Elution from: 55.3977 to 55.3977 RT Apex: 54.77 FinneganScanNumber: 19243
1	1	PRKDC_HUMAN	DNA-dependent protein kinase catalytic subunit OS=Homo sapiens OX=9606 GN=PRKDC PE=1 SV=3	12983	473749	663	475	246	192	62	1810	1	1	1	450.247	898.48	2	898.48	0.0001	0	13.83	0.041	K	SIELFYK	F					Elution from: 54.6333 to 54.6333 RT Apex: 54.77 FinneganScanNumber: 18875
1	1	PRKDC_HUMAN	DNA-dependent protein kinase catalytic subunit OS=Homo sapiens OX=9606 GN=PRKDC PE=1 SV=3	12983	473749	663	475	246	192	62	1816	1	1	1	450.731	899.448	2	899.45	-0.0025	0	6.53	0.22	R	EFPPGTPR	F					Elution from: 33.9493 to 33.9493 RT Apex: 33.99 FinneganScanNumber: 9601
1	1	PRKDC_HUMAN	DNA-dependent protein kinase catalytic subunit OS=Homo sapiens OX=9606 GN=PRKDC PE=1 SV=3	12983	473749	663	475	246	192	62	1817	1	1	1	450.731	899.448	2	899.45	-0.0019	0	3.61	0.44	R	EFPPGTPR	F					Elution from: 33.1866 to 33.1866 RT Apex: 33.99 FinneganScanNumber: 9283
1	1	PRKDC_HUMAN	DNA-dependent protein kinase catalytic subunit OS=Homo sapiens OX=9606 GN=PRKDC PE=1 SV=3	12983	473749	663	475	246	192	62	1818	1	1	1	450.732	899.45	2	899.45	-0.0001	0	7.95	0.16	R	EFPPGTPR	F					Elution from: 34.7042 to 34.7042 RT Apex: 33.99 FinneganScanNumber: 9920
1	1	PRKDC_HUMAN	DNA-dependent protein kinase catalytic subunit OS=Homo sapiens OX=9606 GN=PRKDC PE=1 SV=3	12983	473749	663	475	246	192	62	1819	1	1	1	450.732	899.45	2	899.45	-0.0001	0	17.1	0.019	R	EFPPGTPR	F					Elution from: 35.4565 to 35.4565 RT Apex: 34.47 FinneganScanNumber: 10241
1	1	PRKDC_HUMAN	DNA-dependent protein kinase catalytic subunit OS=Homo sapiens OX=9606 GN=PRKDC PE=1 SV=3	12983	473749	663	475	246	192	62	1820	1	1	1	450.732	899.45	2	899.45	-0.0001	0	1.9	0.65	R	EFPPGTPR	F					Elution from: 32.4258 to 32.4258 RT Apex: 33.99 FinneganScanNumber: 8980
1	1	PRKDC_HUMAN	DNA-dependent protein kinase catalytic subunit OS=Homo sapiens OX=9606 GN=PRKDC PE=1 SV=3	12983	473749	663	475	246	192	62	1821	1	1	1	450.733	899.45	2	899.45	0.0003	0	1.74	0.67	R	EFPPGTPR	F					Elution from: 36.2114 to 36.2114 RT Apex: 35.22 FinneganScanNumber: 10565
1	1	PRKDC_HUMAN	DNA-dependent protein kinase catalytic subunit OS=Homo sapiens OX=9606 GN=PRKDC PE=1 SV=3	12983	473749	663	475	246	192	62	1845	1	1	1	451.739	901.464	2	901.466	-0.0017	0	0.71	0.85	K	SFPPLADR	F					Elution from: 46.0533 to 46.0533 RT Apex: 45.08 FinneganScanNumber: 14818
1	1	PRKDC_HUMAN	DNA-dependent protein kinase catalytic subunit OS=Homo sapiens OX=9606 GN=PRKDC PE=1 SV=3	12983	473749	663	475	246	192	62	1847	1	1	1	451.74	901.465	2	901.466	-0.0005	0	4.32	0.37	K	SFPPLADR	F					Elution from: 46.8172 to 46.8172 RT Apex: 45.83 FinneganScanNumber: 15178
1	1	PRKDC_HUMAN	DNA-dependent protein kinase catalytic subunit OS=Homo sapiens OX=9606 GN=PRKDC PE=1 SV=3	12983	473749	663	475	246	192	62	1848	1	1	1	451.74	901.466	2	901.466	0.0003	0	7.71	0.17	K	SFPPLADR	F					Elution from: 44.3036 to 44.3036 RT Apex: 44.99 FinneganScanNumber: 13971
1	1	PRKDC_HUMAN	DNA-dependent protein kinase catalytic subunit OS=Homo sapiens OX=9606 GN=PRKDC PE=1 SV=3	12983	473749	663	475	246	192	62	1850	1	1	1	451.741	901.467	2	901.466	0.0015	0	3.9	0.41	K	SFPPLADR	F					Elution from: 45.0571 to 45.0571 RT Apex: 44.99 FinneganScanNumber: 14330
1	1	PRKDC_HUMAN	DNA-dependent protein kinase catalytic subunit OS=Homo sapiens OX=9606 GN=PRKDC PE=1 SV=3	12983	473749	663	475	246	192	62	1858	1	1	1	452.212	902.409	2	902.409	-0.0007	0	18.79	0.013	R	TSPQEGER	Y					Elution from: 15.3263 to 15.3263 RT Apex: 15.84 FinneganScanNumber: 2565
1	1	PRKDC_HUMAN	DNA-dependent protein kinase catalytic subunit OS=Homo sapiens OX=9606 GN=PRKDC PE=1 SV=3	12983	473749	663	475	246	192	62	1859	1	1	1	452.212	902.41	2	902.409	0.0003	0	0.35	0.92	R	TSPQEGER	Y					Elution from: 14.5749 to 14.5749 RT Apex: 15.84 FinneganScanNumber: 2428
1	1	PRKDC_HUMAN	DNA-dependent protein kinase catalytic subunit OS=Homo sapiens OX=9606 GN=PRKDC PE=1 SV=3	12983	473749	663	475	246	192	62	1875	1	1	1	453.244	904.474	2	904.477	-0.0024	0	8.14	0.15	K	LLQDFNR	F					Elution from: 38.4124 to 38.4124 RT Apex: 37.52 FinneganScanNumber: 11433
1	1	PRKDC_HUMAN	DNA-dependent protein kinase catalytic subunit OS=Homo sapiens OX=9606 GN=PRKDC PE=1 SV=3	12983	473749	663	475	246	192	62	1876	1	1	1	453.245	904.475	2	904.477	-0.0018	0	11.54	0.07	K	LLQDFNR	F					Elution from: 37.3676 to 37.3676 RT Apex: 37.52 FinneganScanNumber: 11039
1	1	PRKDC_HUMAN	DNA-dependent protein kinase catalytic subunit OS=Homo sapiens OX=9606 GN=PRKDC PE=1 SV=3	12983	473749	663	475	246	192	62	1887	2	1	1	453.739	905.464	2	905.461	0.003	0	0.54	0.88	K	LLQDFNR	F	Deamidated (NQ)	0.0010000.0			Elution from: 40.4912 to 40.4912 RT Apex: 40.57 FinneganScanNumber: 12257
1	1	PRKDC_HUMAN	DNA-dependent protein kinase catalytic subunit OS=Homo sapiens OX=9606 GN=PRKDC PE=1 SV=3	12983	473749	663	475	246	192	62	1919	1	1	1	454.711	907.407	2	907.408	-0.0007	0	7.95	0.16	K	EPSFDWK	N					Elution from: 47.1092 to 47.1092 RT Apex: 47.49 FinneganScanNumber: 15326
1	1	PRKDC_HUMAN	DNA-dependent protein kinase catalytic subunit OS=Homo sapiens OX=9606 GN=PRKDC PE=1 SV=3	12983	473749	663	475	246	192	62	1920	1	1	1	454.711	907.407	2	907.408	-0.0001	0	18	0.016	K	EPSFDWK	N					Elution from: 47.8623 to 47.8623 RT Apex: 47.49 FinneganScanNumber: 15715
1	1	PRKDC_HUMAN	DNA-dependent protein kinase catalytic subunit OS=Homo sapiens OX=9606 GN=PRKDC PE=1 SV=3	12983	473749	663	475	246	192	62	1936	1	1	1	455.726	909.438	2	909.438	0	0	2.17	0.61	K	DFVQVMR	H	Oxidation (M)	0.0000020.0			Elution from: 36.8776 to 36.8776 RT Apex: 36.90 FinneganScanNumber: 10845
1	1	PRKDC_HUMAN	DNA-dependent protein kinase catalytic subunit OS=Homo sapiens OX=9606 GN=PRKDC PE=1 SV=3	12983	473749	663	475	246	192	62	1986	1	1	1	457.762	913.509	2	913.512	-0.0034	0	14.83	0.033	K	IPDTVLEK	V					Elution from: 37.5726 to 37.5726 RT Apex: 37.92 FinneganScanNumber: 11104
1	1	PRKDC_HUMAN	DNA-dependent protein kinase catalytic subunit OS=Homo sapiens OX=9606 GN=PRKDC PE=1 SV=3	12983	473749	663	475	246	192	62	2000	1	1	1	458.248	914.482	2	914.482	-0.0001	0	35.29	0.0003	R	LPSNTLDR	L					Elution from: 26.9872 to 26.9872 RT Apex: 26.79 FinneganScanNumber: 6762
1	1	PRKDC_HUMAN	DNA-dependent protein kinase catalytic subunit OS=Homo sapiens OX=9606 GN=PRKDC PE=1 SV=3	12983	473749	663	475	246	192	62	2008	1	1	1	458.74	915.466	2	915.466	-0.0003	0	16.11	0.024	R	LPSNTLDR	L	Deamidated (NQ)	0.00010000.0			Elution from: 30.4475 to 30.4475 RT Apex: 31.52 FinneganScanNumber: 8174
1	1	PRKDC_HUMAN	DNA-dependent protein kinase catalytic subunit OS=Homo sapiens OX=9606 GN=PRKDC PE=1 SV=3	12983	473749	663	475	246	192	62	2030	1	1	1	459.758	917.502	2	917.5	0.0014	0	37.07	0.0002	R	LAAVVSACK	Q					Elution from: 28.4376 to 28.4376 RT Apex: 28.57 FinneganScanNumber: 7363
1	1	PRKDC_HUMAN	DNA-dependent protein kinase catalytic subunit OS=Homo sapiens OX=9606 GN=PRKDC PE=1 SV=3	12983	473749	663	475	246	192	62	2037	1	1	1	460.271	918.527	2	918.529	-0.002	0	16.58	0.022	K	VIAGLYQR	A					Elution from: 37.0267 to 37.0267 RT Apex: 37.02 FinneganScanNumber: 10921
1	1	PRKDC_HUMAN	DNA-dependent protein kinase catalytic subunit OS=Homo sapiens OX=9606 GN=PRKDC PE=1 SV=3	12983	473749	663	475	246	192	62	2038	1	1	1	460.271	918.528	2	918.529	-0.0006	0	19.69	0.011	K	VIAGLYQR	A					Elution from: 37.7820 to 37.7820 RT Apex: 37.02 FinneganScanNumber: 11176
1	1	PRKDC_HUMAN	DNA-dependent protein kinase catalytic subunit OS=Homo sapiens OX=9606 GN=PRKDC PE=1 SV=3	12983	473749	663	475	246	192	62	2039	1	1	1	460.272	918.53	2	918.529	0.0018	0	13.89	0.041	K	VIAGLYQR	A					Elution from: 38.5406 to 38.5406 RT Apex: 37.55 FinneganScanNumber: 11490
1	1	PRKDC_HUMAN	DNA-dependent protein kinase catalytic subunit OS=Homo sapiens OX=9606 GN=PRKDC PE=1 SV=3	12983	473749	663	475	246	192	62	2092	1	1	1	463.734	925.454	2	925.455	-0.0007	0	9.76	0.11	K	YFEGVSPK	S					Elution from: 34.4125 to 34.4125 RT Apex: 34.58 FinneganScanNumber: 9792
1	1	PRKDC_HUMAN	DNA-dependent protein kinase catalytic subunit OS=Homo sapiens OX=9606 GN=PRKDC PE=1 SV=3	12983	473749	663	475	246	192	62	2093	1	1	1	463.734	925.454	2	925.455	-0.0003	0	8.39	0.14	K	YFEGVSPK	S					Elution from: 35.1693 to 35.1693 RT Apex: 34.58 FinneganScanNumber: 10121
1	1	PRKDC_HUMAN	DNA-dependent protein kinase catalytic subunit OS=Homo sapiens OX=9606 GN=PRKDC PE=1 SV=3	12983	473749	663	475	246	192	62	2095	1	1	1	463.763	925.512	2	925.513	-0.0015	0	10.54	0.088	R	WPVAGQIR	A					Elution from: 45.0597 to 45.0597 RT Apex: 45.04 FinneganScanNumber: 14332
1	1	PRKDC_HUMAN	DNA-dependent protein kinase catalytic subunit OS=Homo sapiens OX=9606 GN=PRKDC PE=1 SV=3	12983	473749	663	475	246	192	62	2101	1	1	1	464.232	926.45	2	926.45	-0.0001	0	17.85	0.016	K	DYVDLFR	H					Elution from: 74.6416 to 74.6416 RT Apex: 74.73 FinneganScanNumber: 27949
1	1	PRKDC_HUMAN	DNA-dependent protein kinase catalytic subunit OS=Homo sapiens OX=9606 GN=PRKDC PE=1 SV=3	12983	473749	663	475	246	192	62	2102	1	1	1	464.232	926.45	2	926.45	-0.0001	0	10.3	0.093	K	DYVDLFR	H					Elution from: 67.5387 to 67.5387 RT Apex: 67.75 FinneganScanNumber: 24936
1	1	PRKDC_HUMAN	DNA-dependent protein kinase catalytic subunit OS=Homo sapiens OX=9606 GN=PRKDC PE=1 SV=3	12983	473749	663	475	246	192	62	2103	1	1	1	464.233	926.451	2	926.45	0.0013	0	2.76	0.53	K	DYVDLFR	H					Elution from: 64.0776 to 64.0776 RT Apex: 63.99 FinneganScanNumber: 23301
1	1	PRKDC_HUMAN	DNA-dependent protein kinase catalytic subunit OS=Homo sapiens OX=9606 GN=PRKDC PE=1 SV=3	12983	473749	663	475	246	192	62	2104	1	1	1	464.233	926.452	2	926.45	0.0019	0	21.29	0.0074	K	DYVDLFR	H					Elution from: 68.3057 to 68.3057 RT Apex: 67.75 FinneganScanNumber: 25280
1	1	PRKDC_HUMAN	DNA-dependent protein kinase catalytic subunit OS=Homo sapiens OX=9606 GN=PRKDC PE=1 SV=3	12983	473749	663	475	246	192	62	2138	1	1	1	465.297	928.58	2	928.578	0.0021	0	22.21	0.006	K	MAVLALLAK	I					Elution from: 71.5615 to 71.5615 RT Apex: 71.70 FinneganScanNumber: 26578
1	1	PRKDC_HUMAN	DNA-dependent protein kinase catalytic subunit OS=Homo sapiens OX=9606 GN=PRKDC PE=1 SV=3	12983	473749	663	475	246	192	62	2185	1	1	1	467.261	932.508	2	932.508	0.0003	0	13.57	0.044	R	YAVPSAGLR	L					Elution from: 39.7198 to 39.7198 RT Apex: 39.82 FinneganScanNumber: 11978
1	1	PRKDC_HUMAN	DNA-dependent protein kinase catalytic subunit OS=Homo sapiens OX=9606 GN=PRKDC PE=1 SV=3	12983	473749	663	475	246	192	62	2187	1	1	1	467.262	932.51	2	932.508	0.0023	0	22.23	0.006	R	YAVPSAGLR	L					Elution from: 40.4856 to 40.4856 RT Apex: 39.82 FinneganScanNumber: 12253
1	1	PRKDC_HUMAN	DNA-dependent protein kinase catalytic subunit OS=Homo sapiens OX=9606 GN=PRKDC PE=1 SV=3	12983	473749	663	475	246	192	62	2209	1	1	1	468.236	934.458	2	934.458	-0.0004	0	19.74	0.011	K	TLVECWK	D					Elution from: 42.2622 to 42.2622 RT Apex: 41.68 FinneganScanNumber: 13016
1	1	PRKDC_HUMAN	DNA-dependent protein kinase catalytic subunit OS=Homo sapiens OX=9606 GN=PRKDC PE=1 SV=3	12983	473749	663	475	246	192	62	2210	1	1	1	468.236	934.458	2	934.458	-0.0002	0	10.14	0.097	K	TLVECWK	D					Elution from: 41.5073 to 41.5073 RT Apex: 41.68 FinneganScanNumber: 12678
1	1	PRKDC_HUMAN	DNA-dependent protein kinase catalytic subunit OS=Homo sapiens OX=9606 GN=PRKDC PE=1 SV=3	12983	473749	663	475	246	192	62	2224	1	1	1	468.768	935.521	2	935.523	-0.0018	0	20.99	0.008	R	LSFAVPFR	E					Elution from: 68.1832 to 68.1832 RT Apex: 68.33 FinneganScanNumber: 25224
1	1	PRKDC_HUMAN	DNA-dependent protein kinase catalytic subunit OS=Homo sapiens OX=9606 GN=PRKDC PE=1 SV=3	12983	473749	663	475	246	192	62	2225	1	1	1	468.769	935.522	2	935.523	-0.0004	0	20.24	0.0095	R	LSFAVPFR	E					Elution from: 68.9619 to 68.9619 RT Apex: 68.33 FinneganScanNumber: 25479
1	1	PRKDC_HUMAN	DNA-dependent protein kinase catalytic subunit OS=Homo sapiens OX=9606 GN=PRKDC PE=1 SV=3	12983	473749	663	475	246	192	62	2233	1	1	1	469.714	937.412	2	937.414	-0.0017	0	28.78	0.0013	K	HSPEDPEK	Y					Elution from: 15.8471 to 15.8471 RT Apex: 15.46 FinneganScanNumber: 2670
1	1	PRKDC_HUMAN	DNA-dependent protein kinase catalytic subunit OS=Homo sapiens OX=9606 GN=PRKDC PE=1 SV=3	12983	473749	663	475	246	192	62	2234	1	1	1	469.715	937.415	2	937.414	0.0005	0	16.28	0.024	K	HSPEDPEK	Y					Elution from: 15.0889 to 15.0889 RT Apex: 15.46 FinneganScanNumber: 2518
1	1	PRKDC_HUMAN	DNA-dependent protein kinase catalytic subunit OS=Homo sapiens OX=9606 GN=PRKDC PE=1 SV=3	12983	473749	663	475	246	192	62	2255	1	1	1	470.74	939.466	2	939.466	-0.0005	0	15.82	0.026	R	TETVTSFR	K					Elution from: 29.6361 to 29.6361 RT Apex: 29.77 FinneganScanNumber: 7847
1	1	PRKDC_HUMAN	DNA-dependent protein kinase catalytic subunit OS=Homo sapiens OX=9606 GN=PRKDC PE=1 SV=3	12983	473749	663	475	246	192	62	2256	1	1	1	470.741	939.467	2	939.466	0.0005	0	23.69	0.0043	R	TETVTSFR	K					Elution from: 30.3889 to 30.3889 RT Apex: 29.77 FinneganScanNumber: 8149
1	1	PRKDC_HUMAN	DNA-dependent protein kinase catalytic subunit OS=Homo sapiens OX=9606 GN=PRKDC PE=1 SV=3	12983	473749	663	475	246	192	62	2258	1	1	1	470.761	939.507	2	939.506	0.0005	0	10.87	0.082	K	FYGELALK	K					Elution from: 52.8030 to 52.8030 RT Apex: 52.94 FinneganScanNumber: 18120
1	1	PRKDC_HUMAN	DNA-dependent protein kinase catalytic subunit OS=Homo sapiens OX=9606 GN=PRKDC PE=1 SV=3	12983	473749	663	475	246	192	62	2259	1	1	1	470.761	939.507	2	939.506	0.0009	0	7.62	0.17	K	FYGELALK	K					Elution from: 53.5766 to 53.5766 RT Apex: 52.94 FinneganScanNumber: 18397
1	1	PRKDC_HUMAN	DNA-dependent protein kinase catalytic subunit OS=Homo sapiens OX=9606 GN=PRKDC PE=1 SV=3	12983	473749	663	475	246	192	62	2331	1	1	1	473.294	944.573	2	944.573	0	0	20.6	0.0087	K	MAVLALLAK	I	Oxidation (M)	0.200000000.0			Elution from: 61.9247 to 61.9247 RT Apex: 61.94 FinneganScanNumber: 22343
1	1	PRKDC_HUMAN	DNA-dependent protein kinase catalytic subunit OS=Homo sapiens OX=9606 GN=PRKDC PE=1 SV=3	12983	473749	663	475	246	192	62	2332	1	1	1	473.294	944.573	2	944.573	0	0	26.84	0.0021	K	MAVLALLAK	I	Oxidation (M)	0.200000000.0			Elution from: 60.2108 to 60.2108 RT Apex: 60.32 FinneganScanNumber: 21576
1	1	PRKDC_HUMAN	DNA-dependent protein kinase catalytic subunit OS=Homo sapiens OX=9606 GN=PRKDC PE=1 SV=3	12983	473749	663	475	246	192	62	2333	1	1	1	473.294	944.573	2	944.573	0.0006	0	7.67	0.17	K	MAVLALLAK	I	Oxidation (M)	0.200000000.0			Elution from: 71.8298 to 71.8298 RT Apex: 71.76 FinneganScanNumber: 26690
1	1	PRKDC_HUMAN	DNA-dependent protein kinase catalytic subunit OS=Homo sapiens OX=9606 GN=PRKDC PE=1 SV=3	12983	473749	663	475	246	192	62	2356	1	1	1	474.741	947.467	2	947.467	-0.0004	0	20.91	0.0081	R	TQEGSLSAR	W					Elution from: 16.1521 to 16.1521 RT Apex: 16.14 FinneganScanNumber: 2775
1	1	PRKDC_HUMAN	DNA-dependent protein kinase catalytic subunit OS=Homo sapiens OX=9606 GN=PRKDC PE=1 SV=3	12983	473749	663	475	246	192	62	2388	1	1	1	476.235	950.456	2	950.456	0.0002	0	22.11	0.0061	K	TSALSDETK	N					Elution from: 16.1943 to 16.1943 RT Apex: 16.20 FinneganScanNumber: 2803
1	1	PRKDC_HUMAN	DNA-dependent protein kinase catalytic subunit OS=Homo sapiens OX=9606 GN=PRKDC PE=1 SV=3	12983	473749	663	475	246	192	62	2399	1	1	1	476.297	950.58	2	950.58	0.0002	0	13.69	0.043	R	LLPAELPAK	R					Elution from: 48.6479 to 48.6479 RT Apex: 47.71 FinneganScanNumber: 16086
1	1	PRKDC_HUMAN	DNA-dependent protein kinase catalytic subunit OS=Homo sapiens OX=9606 GN=PRKDC PE=1 SV=3	12983	473749	663	475	246	192	62	2400	1	1	1	476.298	950.581	2	950.58	0.001	0	12.61	0.055	R	LLPAELPAK	R					Elution from: 47.5608 to 47.5608 RT Apex: 47.71 FinneganScanNumber: 15555
1	1	PRKDC_HUMAN	DNA-dependent protein kinase catalytic subunit OS=Homo sapiens OX=9606 GN=PRKDC PE=1 SV=3	12983	473749	663	475	246	192	62	2401	1	1	1	476.703	951.391	2	951.391	-0.0002	0	26.15	0.0024	K	CDSWWAK	D					Elution from: 44.0962 to 44.0962 RT Apex: 44.25 FinneganScanNumber: 13869
1	1	PRKDC_HUMAN	DNA-dependent protein kinase catalytic subunit OS=Homo sapiens OX=9606 GN=PRKDC PE=1 SV=3	12983	473749	663	475	246	192	62	2424	1	1	1	478.263	954.511	2	954.513	-0.0028	0	5.69	0.27	K	DSKPPGNLK	E					Elution from: 16.1107 to 16.1107 RT Apex: 16.09 FinneganScanNumber: 2749
1	1	PRKDC_HUMAN	DNA-dependent protein kinase catalytic subunit OS=Homo sapiens OX=9606 GN=PRKDC PE=1 SV=3	12983	473749	663	475	246	192	62	2439	1	1	1	478.792	955.57	2	955.57	0.0001	0	18.68	0.014	R	LLEEALLR	L					Elution from: 60.4262 to 60.4262 RT Apex: 59.43 FinneganScanNumber: 21675
1	1	PRKDC_HUMAN	DNA-dependent protein kinase catalytic subunit OS=Homo sapiens OX=9606 GN=PRKDC PE=1 SV=3	12983	473749	663	475	246	192	62	2440	3	1	1	478.793	955.57	2	955.57	0.0003	0	0.02	0.99	R	LLEEALLR	L					Elution from: 73.3374 to 73.3374 RT Apex: 73.34 FinneganScanNumber: 27360
1	1	PRKDC_HUMAN	DNA-dependent protein kinase catalytic subunit OS=Homo sapiens OX=9606 GN=PRKDC PE=1 SV=3	12983	473749	663	475	246	192	62	2441	1	1	1	478.793	955.57	2	955.57	0.0003	0	30.48	0.00089	R	LLEEALLR	L					Elution from: 58.2201 to 58.2201 RT Apex: 57.62 FinneganScanNumber: 20635
1	1	PRKDC_HUMAN	DNA-dependent protein kinase catalytic subunit OS=Homo sapiens OX=9606 GN=PRKDC PE=1 SV=3	12983	473749	663	475	246	192	62	2442	1	1	1	478.793	955.57	2	955.57	0.0003	0	34.09	0.00039	R	LLEEALLR	L					Elution from: 57.4660 to 57.4660 RT Apex: 57.62 FinneganScanNumber: 20268
1	1	PRKDC_HUMAN	DNA-dependent protein kinase catalytic subunit OS=Homo sapiens OX=9606 GN=PRKDC PE=1 SV=3	12983	473749	663	475	246	192	62	2444	1	1	1	478.793	955.572	2	955.57	0.0017	0	4.47	0.36	R	LLEEALLR	L					Elution from: 59.6072 to 59.6072 RT Apex: 58.65 FinneganScanNumber: 21293
1	1	PRKDC_HUMAN	DNA-dependent protein kinase catalytic subunit OS=Homo sapiens OX=9606 GN=PRKDC PE=1 SV=3	12983	473749	663	475	246	192	62	2543	1	1	1	483.242	964.469	2	964.469	0.0001	0	24.77	0.0033	R	MYAALGDPK	A					Elution from: 35.8847 to 35.8847 RT Apex: 36.00 FinneganScanNumber: 10415
1	1	PRKDC_HUMAN	DNA-dependent protein kinase catalytic subunit OS=Homo sapiens OX=9606 GN=PRKDC PE=1 SV=3	12983	473749	663	475	246	192	62	2545	1	1	1	483.256	964.497	2	964.498	-0.0003	0	19.58	0.011	K	SLNSIEFR	E					Elution from: 44.7780 to 44.7780 RT Apex: 44.94 FinneganScanNumber: 14188
1	1	PRKDC_HUMAN	DNA-dependent protein kinase catalytic subunit OS=Homo sapiens OX=9606 GN=PRKDC PE=1 SV=3	12983	473749	663	475	246	192	62	2546	1	1	1	483.256	964.497	2	964.498	-0.0003	0	7.19	0.19	K	SLNSIEFR	E					Elution from: 45.6869 to 45.6869 RT Apex: 44.94 FinneganScanNumber: 14651
1	1	PRKDC_HUMAN	DNA-dependent protein kinase catalytic subunit OS=Homo sapiens OX=9606 GN=PRKDC PE=1 SV=3	12983	473749	663	475	246	192	62	2551	1	1	1	483.719	965.423	2	965.424	-0.0015	0	13.64	0.043	K	MQLVCCR	A					Elution from: 31.5025 to 31.5025 RT Apex: 31.54 FinneganScanNumber: 8662
1	1	PRKDC_HUMAN	DNA-dependent protein kinase catalytic subunit OS=Homo sapiens OX=9606 GN=PRKDC PE=1 SV=3	12983	473749	663	475	246	192	62	2554	1	1	1	483.748	965.482	2	965.482	0.0003	0	9	0.13	K	SLNSIEFR	E	Deamidated (NQ)	0.00100000.0			Elution from: 48.7909 to 48.7909 RT Apex: 48.92 FinneganScanNumber: 16154
1	1	PRKDC_HUMAN	DNA-dependent protein kinase catalytic subunit OS=Homo sapiens OX=9606 GN=PRKDC PE=1 SV=3	12983	473749	663	475	246	192	62	2555	1	1	1	483.749	965.484	2	965.482	0.0019	0	12.36	0.058	K	SLNSIEFR	E	Deamidated (NQ)	0.00100000.0			Elution from: 49.7632 to 49.7632 RT Apex: 49.86 FinneganScanNumber: 16643
1	1	PRKDC_HUMAN	DNA-dependent protein kinase catalytic subunit OS=Homo sapiens OX=9606 GN=PRKDC PE=1 SV=3	12983	473749	663	475	246	192	62	2580	1	1	1	484.782	967.549	2	967.549	-0.0003	1	31.83	0.00066	R	KFIQTFGK	E					Elution from: 29.7657 to 29.7657 RT Apex: 29.98 FinneganScanNumber: 7895
1	1	PRKDC_HUMAN	DNA-dependent protein kinase catalytic subunit OS=Homo sapiens OX=9606 GN=PRKDC PE=1 SV=3	12983	473749	663	475	246	192	62	2601	1	1	1	485.791	969.568	2	969.568	-0.0001	0	10.92	0.081	K	LPVLAGCLK	G					Elution from: 55.1040 to 55.1040 RT Apex: 54.11 FinneganScanNumber: 19095
1	1	PRKDC_HUMAN	DNA-dependent protein kinase catalytic subunit OS=Homo sapiens OX=9606 GN=PRKDC PE=1 SV=3	12983	473749	663	475	246	192	62	2602	1	1	1	485.791	969.568	2	969.568	0.0003	0	15.15	0.031	K	LPVLAGCLK	G					Elution from: 54.3169 to 54.3169 RT Apex: 53.73 FinneganScanNumber: 18716
1	1	PRKDC_HUMAN	DNA-dependent protein kinase catalytic subunit OS=Homo sapiens OX=9606 GN=PRKDC PE=1 SV=3	12983	473749	663	475	246	192	62	2603	1	1	1	485.792	969.569	2	969.568	0.0011	0	21.71	0.0068	K	LPVLAGCLK	G					Elution from: 53.5518 to 53.5518 RT Apex: 53.73 FinneganScanNumber: 18388
1	1	PRKDC_HUMAN	DNA-dependent protein kinase catalytic subunit OS=Homo sapiens OX=9606 GN=PRKDC PE=1 SV=3	12983	473749	663	475	246	192	62	2726	1	1	1	491.239	980.463	2	980.464	-0.0005	0	2.96	0.51	R	MYAALGDPK	A	Oxidation (M)	0.200000000.0			Elution from: 30.2973 to 30.2973 RT Apex: 30.15 FinneganScanNumber: 8103
1	1	PRKDC_HUMAN	DNA-dependent protein kinase catalytic subunit OS=Homo sapiens OX=9606 GN=PRKDC PE=1 SV=3	12983	473749	663	475	246	192	62	2727	1	1	1	491.24	980.465	2	980.464	0.0015	0	12.65	0.054	R	MYAALGDPK	A	Oxidation (M)	0.200000000.0			Elution from: 29.5156 to 29.5156 RT Apex: 29.36 FinneganScanNumber: 7785
1	1	PRKDC_HUMAN	DNA-dependent protein kinase catalytic subunit OS=Homo sapiens OX=9606 GN=PRKDC PE=1 SV=3	12983	473749	663	475	246	192	62	2911	1	1	1	498.328	994.641	2	994.643	-0.0012	0	24.97	0.0032	K	IPALDLLIK	L					Elution from: 80.3489 to 80.3489 RT Apex: 79.36 FinneganScanNumber: 30402
1	1	PRKDC_HUMAN	DNA-dependent protein kinase catalytic subunit OS=Homo sapiens OX=9606 GN=PRKDC PE=1 SV=3	12983	473749	663	475	246	192	62	2912	1	1	1	498.329	994.642	2	994.643	-0.0002	0	23.4	0.0046	K	IPALDLLIK	L					Elution from: 83.3580 to 83.3580 RT Apex: 83.08 FinneganScanNumber: 31677
1	1	PRKDC_HUMAN	DNA-dependent protein kinase catalytic subunit OS=Homo sapiens OX=9606 GN=PRKDC PE=1 SV=3	12983	473749	663	475	246	192	62	2913	1	1	1	498.329	994.643	2	994.643	0	0	23.28	0.0047	K	IPALDLLIK	L					Elution from: 79.5914 to 79.5914 RT Apex: 79.08 FinneganScanNumber: 30063
1	1	PRKDC_HUMAN	DNA-dependent protein kinase catalytic subunit OS=Homo sapiens OX=9606 GN=PRKDC PE=1 SV=3	12983	473749	663	475	246	192	62	2914	1	1	1	498.329	994.643	2	994.643	0.0002	0	24.55	0.0035	K	IPALDLLIK	L					Elution from: 81.9681 to 81.9681 RT Apex: 81.00 FinneganScanNumber: 31086
1	1	PRKDC_HUMAN	DNA-dependent protein kinase catalytic subunit OS=Homo sapiens OX=9606 GN=PRKDC PE=1 SV=3	12983	473749	663	475	246	192	62	2915	1	1	1	498.329	994.643	2	994.643	0.0002	0	23.61	0.0044	K	IPALDLLIK	L					Elution from: 81.1792 to 81.1792 RT Apex: 80.19 FinneganScanNumber: 30742
1	1	PRKDC_HUMAN	DNA-dependent protein kinase catalytic subunit OS=Homo sapiens OX=9606 GN=PRKDC PE=1 SV=3	12983	473749	663	475	246	192	62	2916	1	1	1	498.329	994.643	2	994.643	0.0004	0	21.87	0.0065	K	IPALDLLIK	L					Elution from: 78.8332 to 78.8332 RT Apex: 79.08 FinneganScanNumber: 29748
1	1	PRKDC_HUMAN	DNA-dependent protein kinase catalytic subunit OS=Homo sapiens OX=9606 GN=PRKDC PE=1 SV=3	12983	473749	663	475	246	192	62	2917	1	1	1	498.329	994.643	2	994.643	0.0006	0	28.46	0.0014	K	IPALDLLIK	L					Elution from: 73.2075 to 73.2075 RT Apex: 73.25 FinneganScanNumber: 27309
1	1	PRKDC_HUMAN	DNA-dependent protein kinase catalytic subunit OS=Homo sapiens OX=9606 GN=PRKDC PE=1 SV=3	12983	473749	663	475	246	192	62	2924	1	1	1	498.763	995.511	2	995.511	-0.0001	0	9.61	0.11	K	ILDVMYSR	L					Elution from: 50.7025 to 50.7025 RT Apex: 50.86 FinneganScanNumber: 17091
1	1	PRKDC_HUMAN	DNA-dependent protein kinase catalytic subunit OS=Homo sapiens OX=9606 GN=PRKDC PE=1 SV=3	12983	473749	663	475	246	192	62	2925	1	1	1	498.763	995.511	2	995.511	0.0001	0	5.17	0.3	K	ILDVMYSR	L					Elution from: 51.5024 to 51.5024 RT Apex: 50.86 FinneganScanNumber: 17492
1	1	PRKDC_HUMAN	DNA-dependent protein kinase catalytic subunit OS=Homo sapiens OX=9606 GN=PRKDC PE=1 SV=3	12983	473749	663	475	246	192	62	2926	1	1	1	498.776	995.537	2	995.54	-0.0033	0	9.83	0.1	K	DILETHLR	E					Elution from: 40.6451 to 40.6451 RT Apex: 40.13 FinneganScanNumber: 12314
1	1	PRKDC_HUMAN	DNA-dependent protein kinase catalytic subunit OS=Homo sapiens OX=9606 GN=PRKDC PE=1 SV=3	12983	473749	663	475	246	192	62	2927	1	1	1	498.778	995.541	2	995.54	0.0009	0	18	0.016	K	DILETHLR	E					Elution from: 39.7973 to 39.7973 RT Apex: 40.13 FinneganScanNumber: 12013
1	1	PRKDC_HUMAN	DNA-dependent protein kinase catalytic subunit OS=Homo sapiens OX=9606 GN=PRKDC PE=1 SV=3	12983	473749	663	475	246	192	62	2993	1	1	1	501.316	1000.62	2	1000.62	-0.0007	1	11.2	0.076	K	RTFPVLLR	L					Elution from: 45.3149 to 45.3149 RT Apex: 45.38 FinneganScanNumber: 14466
1	1	PRKDC_HUMAN	DNA-dependent protein kinase catalytic subunit OS=Homo sapiens OX=9606 GN=PRKDC PE=1 SV=3	12983	473749	663	475	246	192	62	3094	1	1	1	505.289	1008.56	2	1008.56	-0.0006	0	9.22	0.12	R	EIFNFVLK	A					Elution from: 75.4461 to 75.4461 RT Apex: 75.44 FinneganScanNumber: 28268
1	1	PRKDC_HUMAN	DNA-dependent protein kinase catalytic subunit OS=Homo sapiens OX=9606 GN=PRKDC PE=1 SV=3	12983	473749	663	475	246	192	62	3095	1	1	1	505.289	1008.56	2	1008.56	0	0	13.73	0.042	R	EIFNFVLK	A					Elution from: 74.4216 to 74.4216 RT Apex: 73.83 FinneganScanNumber: 27852
1	1	PRKDC_HUMAN	DNA-dependent protein kinase catalytic subunit OS=Homo sapiens OX=9606 GN=PRKDC PE=1 SV=3	12983	473749	663	475	246	192	62	3096	1	1	1	505.29	1008.56	2	1008.56	0.0002	0	8.22	0.15	R	EIFNFVLK	A					Elution from: 73.6625 to 73.6625 RT Apex: 73.83 FinneganScanNumber: 27511
1	1	PRKDC_HUMAN	DNA-dependent protein kinase catalytic subunit OS=Homo sapiens OX=9606 GN=PRKDC PE=1 SV=3	12983	473749	663	475	246	192	62	3097	1	1	1	505.29	1008.57	2	1008.56	0.0012	0	8.53	0.14	R	EIFNFVLK	A					Elution from: 70.7241 to 70.7241 RT Apex: 70.71 FinneganScanNumber: 26209
1	1	PRKDC_HUMAN	DNA-dependent protein kinase catalytic subunit OS=Homo sapiens OX=9606 GN=PRKDC PE=1 SV=3	12983	473749	663	475	246	192	62	3102	1	1	1	505.727	1009.44	2	1009.44	-0.0003	0	4.84	0.33	K	CFGTGAAGNR	T					Elution from: 21.3294 to 21.3294 RT Apex: 20.71 FinneganScanNumber: 4379
1	1	PRKDC_HUMAN	DNA-dependent protein kinase catalytic subunit OS=Homo sapiens OX=9606 GN=PRKDC PE=1 SV=3	12983	473749	663	475	246	192	62	3109	1	1	1	505.782	1009.55	2	1009.55	0.001	0	3.11	0.49	R	EIFNFVLK	A	Deamidated (NQ)	0.00010000.0			Elution from: 79.9898 to 79.9898 RT Apex: 80.27 FinneganScanNumber: 30242
1	1	PRKDC_HUMAN	DNA-dependent protein kinase catalytic subunit OS=Homo sapiens OX=9606 GN=PRKDC PE=1 SV=3	12983	473749	663	475	246	192	62	3126	1	1	1	506.761	1011.51	2	1011.51	0.0021	0	13.26	0.047	K	ILDVMYSR	L	Oxidation (M)	0.00002000.0			Elution from: 41.2274 to 41.2274 RT Apex: 41.32 FinneganScanNumber: 12552
1	1	PRKDC_HUMAN	DNA-dependent protein kinase catalytic subunit OS=Homo sapiens OX=9606 GN=PRKDC PE=1 SV=3	12983	473749	663	475	246	192	62	3127	1	1	1	506.764	1011.51	2	1011.51	0.0065	0	0.79	0.83	K	ILDVMYSR	L	Oxidation (M)	0.00002000.0			Elution from: 43.5579 to 43.5579 RT Apex: 44.08 FinneganScanNumber: 13616
1	1	PRKDC_HUMAN	DNA-dependent protein kinase catalytic subunit OS=Homo sapiens OX=9606 GN=PRKDC PE=1 SV=3	12983	473749	663	475	246	192	62	3131	1	1	1	506.8	1011.58	2	1011.59	-0.0017	0	5.25	0.3	K	FVPLLPGNR	S					Elution from: 60.8830 to 60.8830 RT Apex: 60.96 FinneganScanNumber: 21866
1	1	PRKDC_HUMAN	DNA-dependent protein kinase catalytic subunit OS=Homo sapiens OX=9606 GN=PRKDC PE=1 SV=3	12983	473749	663	475	246	192	62	3132	1	1	1	506.8	1011.59	2	1011.59	-0.0003	0	8.28	0.15	K	FVPLLPGNR	S					Elution from: 59.6921 to 59.6921 RT Apex: 58.70 FinneganScanNumber: 21330
1	1	PRKDC_HUMAN	DNA-dependent protein kinase catalytic subunit OS=Homo sapiens OX=9606 GN=PRKDC PE=1 SV=3	12983	473749	663	475	246	192	62	3133	1	1	1	506.801	1011.59	2	1011.59	0.0001	0	10.95	0.08	K	FVPLLPGNR	S					Elution from: 58.9355 to 58.9355 RT Apex: 58.39 FinneganScanNumber: 20978
1	1	PRKDC_HUMAN	DNA-dependent protein kinase catalytic subunit OS=Homo sapiens OX=9606 GN=PRKDC PE=1 SV=3	12983	473749	663	475	246	192	62	3186	1	1	1	509.277	1016.54	2	1016.54	-0.0013	0	21.83	0.0066	R	LLNTWTNR	Y					Elution from: 40.9560 to 40.9560 RT Apex: 41.18 FinneganScanNumber: 12445
1	1	PRKDC_HUMAN	DNA-dependent protein kinase catalytic subunit OS=Homo sapiens OX=9606 GN=PRKDC PE=1 SV=3	12983	473749	663	475	246	192	62	3187	1	1	1	509.277	1016.54	2	1016.54	-0.0007	0	4.53	0.35	R	LLNTWTNR	Y					Elution from: 42.0352 to 42.0352 RT Apex: 41.18 FinneganScanNumber: 12921
1	1	PRKDC_HUMAN	DNA-dependent protein kinase catalytic subunit OS=Homo sapiens OX=9606 GN=PRKDC PE=1 SV=3	12983	473749	663	475	246	192	62	3195	1	1	1	509.769	1017.52	2	1017.52	-0.0003	0	4.64	0.34	R	LLNTWTNR	Y	Deamidated (NQ)	0.00100000.0			Elution from: 45.0030 to 45.0030 RT Apex: 45.11 FinneganScanNumber: 14307
1	1	PRKDC_HUMAN	DNA-dependent protein kinase catalytic subunit OS=Homo sapiens OX=9606 GN=PRKDC PE=1 SV=3	12983	473749	663	475	246	192	62	3218	1	1	1	510.292	1018.57	2	1018.57	-0.0002	0	24.18	0.0038	K	IAPYSVEIK	N					Elution from: 46.2352 to 46.2352 RT Apex: 46.37 FinneganScanNumber: 14906
1	1	PRKDC_HUMAN	DNA-dependent protein kinase catalytic subunit OS=Homo sapiens OX=9606 GN=PRKDC PE=1 SV=3	12983	473749	663	475	246	192	62	3219	1	1	1	510.292	1018.57	2	1018.57	0.0002	0	14.18	0.038	K	IAPYSVEIK	N					Elution from: 47.1372 to 47.1372 RT Apex: 46.37 FinneganScanNumber: 15341
1	1	PRKDC_HUMAN	DNA-dependent protein kinase catalytic subunit OS=Homo sapiens OX=9606 GN=PRKDC PE=1 SV=3	12983	473749	663	475	246	192	62	3260	1	1	1	512.25	1022.49	2	1022.49	-0.0003	0	21.37	0.0073	K	DCLSIPYR	L					Elution from: 51.2358 to 51.2358 RT Apex: 51.40 FinneganScanNumber: 17362
1	1	PRKDC_HUMAN	DNA-dependent protein kinase catalytic subunit OS=Homo sapiens OX=9606 GN=PRKDC PE=1 SV=3	12983	473749	663	475	246	192	62	3268	1	1	1	512.28	1022.55	2	1022.55	-0.0018	0	16.43	0.023	K	VCLDIIYK	M					Elution from: 58.3372 to 58.3372 RT Apex: 58.49 FinneganScanNumber: 20691
1	1	PRKDC_HUMAN	DNA-dependent protein kinase catalytic subunit OS=Homo sapiens OX=9606 GN=PRKDC PE=1 SV=3	12983	473749	663	475	246	192	62	3269	1	1	1	512.28	1022.55	2	1022.55	-0.0006	0	33.99	0.0004	K	VCLDIIYK	M					Elution from: 54.6869 to 54.6869 RT Apex: 54.69 FinneganScanNumber: 18908
1	1	PRKDC_HUMAN	DNA-dependent protein kinase catalytic subunit OS=Homo sapiens OX=9606 GN=PRKDC PE=1 SV=3	12983	473749	663	475	246	192	62	3271	1	1	1	512.281	1022.55	2	1022.55	0.0008	0	15.42	0.029	K	VCLDIIYK	M					Elution from: 59.0924 to 59.0924 RT Apex: 58.49 FinneganScanNumber: 21053
1	1	PRKDC_HUMAN	DNA-dependent protein kinase catalytic subunit OS=Homo sapiens OX=9606 GN=PRKDC PE=1 SV=3	12983	473749	663	475	246	192	62	3428	1	1	1	519.305	1036.6	2	1036.6	0.0003	0	23.01	0.005	R	LPLISGFYK	L					Elution from: 68.5875 to 68.5875 RT Apex: 68.77 FinneganScanNumber: 25384
1	1	PRKDC_HUMAN	DNA-dependent protein kinase catalytic subunit OS=Homo sapiens OX=9606 GN=PRKDC PE=1 SV=3	12983	473749	663	475	246	192	62	3465	1	1	1	521.811	1041.61	2	1041.61	0.0001	1	2.42	0.57	K	KIPDTVLEK	V					Elution from: 31.0691 to 31.0691 RT Apex: 31.29 FinneganScanNumber: 8447
1	1	PRKDC_HUMAN	DNA-dependent protein kinase catalytic subunit OS=Homo sapiens OX=9606 GN=PRKDC PE=1 SV=3	12983	473749	663	475	246	192	62	3615	1	1	1	526.274	1050.53	2	1050.53	-0.0005	0	18.91	0.013	R	SIGEYDVLR	G					Elution from: 51.8384 to 51.8384 RT Apex: 51.87 FinneganScanNumber: 17652
1	1	PRKDC_HUMAN	DNA-dependent protein kinase catalytic subunit OS=Homo sapiens OX=9606 GN=PRKDC PE=1 SV=3	12983	473749	663	475	246	192	62	3616	1	1	1	526.276	1050.54	2	1050.53	0.0025	0	12.68	0.054	R	SIGEYDVLR	G					Elution from: 50.4095 to 50.4095 RT Apex: 49.99 FinneganScanNumber: 16959
1	1	PRKDC_HUMAN	DNA-dependent protein kinase catalytic subunit OS=Homo sapiens OX=9606 GN=PRKDC PE=1 SV=3	12983	473749	663	475	246	192	62	3630	1	1	1	526.784	1051.55	2	1051.56	-0.0023	0	7.55	0.18	R	GIFTSEIGTK	Q					Elution from: 49.5545 to 49.5545 RT Apex: 48.56 FinneganScanNumber: 16537
1	1	PRKDC_HUMAN	DNA-dependent protein kinase catalytic subunit OS=Homo sapiens OX=9606 GN=PRKDC PE=1 SV=3	12983	473749	663	475	246	192	62	3631	1	1	1	526.785	1051.56	2	1051.56	0.0003	0	26.91	0.002	R	GIFTSEIGTK	Q					Elution from: 48.2560 to 48.2560 RT Apex: 48.35 FinneganScanNumber: 15904
1	1	PRKDC_HUMAN	DNA-dependent protein kinase catalytic subunit OS=Homo sapiens OX=9606 GN=PRKDC PE=1 SV=3	12983	473749	663	475	246	192	62	3661	1	1	1	351.885	1052.63	3	1052.63	-0.0004	0	2.54	0.56	K	AIRPQIDLK	R					Elution from: 34.8464 to 34.8464 RT Apex: 34.98 FinneganScanNumber: 9973
1	1	PRKDC_HUMAN	DNA-dependent protein kinase catalytic subunit OS=Homo sapiens OX=9606 GN=PRKDC PE=1 SV=3	12983	473749	663	475	246	192	62	3662	1	1	1	527.324	1052.63	2	1052.63	0	0	0.29	0.94	K	AIRPQIDLK	R					Elution from: 35.1299 to 35.1299 RT Apex: 34.96 FinneganScanNumber: 10104
1	1	PRKDC_HUMAN	DNA-dependent protein kinase catalytic subunit OS=Homo sapiens OX=9606 GN=PRKDC PE=1 SV=3	12983	473749	663	475	246	192	62	3663	1	1	1	527.324	1052.63	2	1052.63	0.0002	0	11.21	0.076	K	AIRPQIDLK	R					Elution from: 35.0226 to 35.0226 RT Apex: 34.96 FinneganScanNumber: 10059
1	1	PRKDC_HUMAN	DNA-dependent protein kinase catalytic subunit OS=Homo sapiens OX=9606 GN=PRKDC PE=1 SV=3	12983	473749	663	475	246	192	62	3664	1	1	1	351.885	1052.63	3	1052.63	0.0005	0	5.59	0.28	K	AIRPQIDLK	R					Elution from: 35.6641 to 35.6641 RT Apex: 34.98 FinneganScanNumber: 10318
1	1	PRKDC_HUMAN	DNA-dependent protein kinase catalytic subunit OS=Homo sapiens OX=9606 GN=PRKDC PE=1 SV=3	12983	473749	663	475	246	192	62	3665	1	1	1	527.325	1052.64	2	1052.63	0.0018	0	0.63	0.86	K	AIRPQIDLK	R					Elution from: 34.2599 to 34.2599 RT Apex: 34.28 FinneganScanNumber: 9726
1	1	PRKDC_HUMAN	DNA-dependent protein kinase catalytic subunit OS=Homo sapiens OX=9606 GN=PRKDC PE=1 SV=3	12983	473749	663	475	246	192	62	3859	1	1	1	533.308	1064.6	2	1064.6	-0.0002	0	23.39	0.0046	R	DFGLLVFVR	K					Elution from: 96.3343 to 96.3343 RT Apex: 95.76 FinneganScanNumber: 36103
1	1	PRKDC_HUMAN	DNA-dependent protein kinase catalytic subunit OS=Homo sapiens OX=9606 GN=PRKDC PE=1 SV=3	12983	473749	663	475	246	192	62	3860	1	1	1	533.308	1064.6	2	1064.6	0.0004	0	20.34	0.0092	R	DFGLLVFVR	K					Elution from: 97.0942 to 97.0942 RT Apex: 96.12 FinneganScanNumber: 36341
1	1	PRKDC_HUMAN	DNA-dependent protein kinase catalytic subunit OS=Homo sapiens OX=9606 GN=PRKDC PE=1 SV=3	12983	473749	663	475	246	192	62	3861	1	1	1	533.309	1064.6	2	1064.6	0.0014	0	18.5	0.014	R	DFGLLVFVR	K					Elution from: 95.5811 to 95.5811 RT Apex: 95.76 FinneganScanNumber: 35899
1	1	PRKDC_HUMAN	DNA-dependent protein kinase catalytic subunit OS=Homo sapiens OX=9606 GN=PRKDC PE=1 SV=3	12983	473749	663	475	246	192	62	3913	1	1	1	535.261	1068.51	2	1068.51	0.0004	0	15.33	0.029	R	GYGLFAGPCK	V					Elution from: 50.6206 to 50.6206 RT Apex: 49.82 FinneganScanNumber: 17053
1	1	PRKDC_HUMAN	DNA-dependent protein kinase catalytic subunit OS=Homo sapiens OX=9606 GN=PRKDC PE=1 SV=3	12983	473749	663	475	246	192	62	3914	1	1	1	535.261	1068.51	2	1068.51	0.0006	0	19.16	0.012	R	GYGLFAGPCK	V					Elution from: 49.8496 to 49.8496 RT Apex: 49.82 FinneganScanNumber: 16688
1	1	PRKDC_HUMAN	DNA-dependent protein kinase catalytic subunit OS=Homo sapiens OX=9606 GN=PRKDC PE=1 SV=3	12983	473749	663	475	246	192	62	3916	1	1	1	535.291	1068.57	2	1068.57	-0.0011	0	12.39	0.058	K	FLCIFLEK	M					Elution from: 76.6178 to 76.6178 RT Apex: 75.88 FinneganScanNumber: 28784
1	1	PRKDC_HUMAN	DNA-dependent protein kinase catalytic subunit OS=Homo sapiens OX=9606 GN=PRKDC PE=1 SV=3	12983	473749	663	475	246	192	62	3917	1	1	1	535.291	1068.57	2	1068.57	-0.0009	0	9.8	0.1	K	FLCIFLEK	M					Elution from: 75.7544 to 75.7544 RT Apex: 75.35 FinneganScanNumber: 28404
1	1	PRKDC_HUMAN	DNA-dependent protein kinase catalytic subunit OS=Homo sapiens OX=9606 GN=PRKDC PE=1 SV=3	12983	473749	663	475	246	192	62	3918	1	1	1	535.291	1068.57	2	1068.57	-0.0005	0	7.73	0.17	K	FLCIFLEK	M					Elution from: 74.9629 to 74.9629 RT Apex: 74.09 FinneganScanNumber: 28078
1	1	PRKDC_HUMAN	DNA-dependent protein kinase catalytic subunit OS=Homo sapiens OX=9606 GN=PRKDC PE=1 SV=3	12983	473749	663	475	246	192	62	3919	1	1	1	535.291	1068.57	2	1068.57	0.0001	0	1.3	0.74	K	FLCIFLEK	M					Elution from: 74.1868 to 74.1868 RT Apex: 73.54 FinneganScanNumber: 27747
1	1	PRKDC_HUMAN	DNA-dependent protein kinase catalytic subunit OS=Homo sapiens OX=9606 GN=PRKDC PE=1 SV=3	12983	473749	663	475	246	192	62	3920	1	1	1	535.291	1068.57	2	1068.57	0.0005	0	4.27	0.37	K	FLCIFLEK	M					Elution from: 73.4247 to 73.4247 RT Apex: 73.54 FinneganScanNumber: 27401
1	1	PRKDC_HUMAN	DNA-dependent protein kinase catalytic subunit OS=Homo sapiens OX=9606 GN=PRKDC PE=1 SV=3	12983	473749	663	475	246	192	62	3979	1	1	1	537.742	1073.47	2	1073.47	-0.0011	0	13.11	0.049	K	NTCTSVYTK	D	Deamidated (NQ)	0.100000000.0			Elution from: 25.9207 to 25.9207 RT Apex: 25.91 FinneganScanNumber: 6349
1	1	PRKDC_HUMAN	DNA-dependent protein kinase catalytic subunit OS=Homo sapiens OX=9606 GN=PRKDC PE=1 SV=3	12983	473749	663	475	246	192	62	4004	1	1	1	359.502	1075.48	3	1075.48	0	0	11.52	0.07	R	NFWSHETR	L					Elution from: 26.3147 to 26.3147 RT Apex: 26.45 FinneganScanNumber: 6503
1	1	PRKDC_HUMAN	DNA-dependent protein kinase catalytic subunit OS=Homo sapiens OX=9606 GN=PRKDC PE=1 SV=3	12983	473749	663	475	246	192	62	4005	1	1	1	538.749	1075.48	2	1075.48	0.0001	0	18.98	0.013	R	NFWSHETR	L					Elution from: 26.6771 to 26.6771 RT Apex: 26.45 FinneganScanNumber: 6646
1	1	PRKDC_HUMAN	DNA-dependent protein kinase catalytic subunit OS=Homo sapiens OX=9606 GN=PRKDC PE=1 SV=3	12983	473749	663	475	246	192	62	4006	1	1	1	359.502	1075.48	3	1075.48	0.0012	0	4.17	0.38	R	NFWSHETR	L					Elution from: 27.8866 to 27.8866 RT Apex: 27.79 FinneganScanNumber: 7125
1	1	PRKDC_HUMAN	DNA-dependent protein kinase catalytic subunit OS=Homo sapiens OX=9606 GN=PRKDC PE=1 SV=3	12983	473749	663	475	246	192	62	4025	1	1	1	359.83	1076.47	3	1076.47	0.0015	0	4.26	0.37	R	NFWSHETR	L	Deamidated (NQ)	0.10000000.0			Elution from: 38.9737 to 38.9737 RT Apex: 39.15 FinneganScanNumber: 11653
1	1	PRKDC_HUMAN	DNA-dependent protein kinase catalytic subunit OS=Homo sapiens OX=9606 GN=PRKDC PE=1 SV=3	12983	473749	663	475	246	192	62	4072	1	1	1	360.836	1079.49	3	1079.49	0	1	4.74	0.34	K	KCDSWWAK	D					Elution from: 31.1419 to 31.1419 RT Apex: 31.23 FinneganScanNumber: 8477
1	1	PRKDC_HUMAN	DNA-dependent protein kinase catalytic subunit OS=Homo sapiens OX=9606 GN=PRKDC PE=1 SV=3	12983	473749	663	475	246	192	62	4204	1	1	1	363.877	1088.61	3	1088.61	0.0001	1	6	0.25	K	RYAVPSAGLR	L					Elution from: 30.3050 to 30.3050 RT Apex: 30.42 FinneganScanNumber: 8106
1	1	PRKDC_HUMAN	DNA-dependent protein kinase catalytic subunit OS=Homo sapiens OX=9606 GN=PRKDC PE=1 SV=3	12983	473749	663	475	246	192	62	4205	1	1	1	545.312	1088.61	2	1088.61	0.0002	1	17.73	0.017	K	RYAVPSAGLR	L					Elution from: 30.3523 to 30.3523 RT Apex: 30.38 FinneganScanNumber: 8130
1	1	PRKDC_HUMAN	DNA-dependent protein kinase catalytic subunit OS=Homo sapiens OX=9606 GN=PRKDC PE=1 SV=3	12983	473749	663	475	246	192	62	4237	1	1	1	546.294	1090.57	2	1090.58	-0.0035	0	50.65	8.6e-06	K	QDAQVVLYR	S					Elution from: 40.6705 to 40.6705 RT Apex: 40.28 FinneganScanNumber: 12324
1	1	PRKDC_HUMAN	DNA-dependent protein kinase catalytic subunit OS=Homo sapiens OX=9606 GN=PRKDC PE=1 SV=3	12983	473749	663	475	246	192	62	4239	1	1	1	546.297	1090.58	2	1090.58	0.0013	0	43.59	4.4e-05	K	QDAQVVLYR	S					Elution from: 39.9121 to 39.9121 RT Apex: 40.28 FinneganScanNumber: 12054
1	1	PRKDC_HUMAN	DNA-dependent protein kinase catalytic subunit OS=Homo sapiens OX=9606 GN=PRKDC PE=1 SV=3	12983	473749	663	475	246	192	62	4364	1	1	1	550.291	1098.57	2	1098.57	-0.0003	0	5.29	0.3	K	QITPQQQEK	S					Elution from: 16.1468 to 16.1468 RT Apex: 16.09 FinneganScanNumber: 2771
1	1	PRKDC_HUMAN	DNA-dependent protein kinase catalytic subunit OS=Homo sapiens OX=9606 GN=PRKDC PE=1 SV=3	12983	473749	663	475	246	192	62	4436	1	1	1	552.287	1102.56	2	1102.56	-0.0024	0	25.74	0.0027	R	LQETLSAADR	C					Elution from: 30.8282 to 30.8282 RT Apex: 30.10 FinneganScanNumber: 8344
1	1	PRKDC_HUMAN	DNA-dependent protein kinase catalytic subunit OS=Homo sapiens OX=9606 GN=PRKDC PE=1 SV=3	12983	473749	663	475	246	192	62	4438	1	1	1	552.29	1102.56	2	1102.56	0.0028	0	35.95	0.00025	R	LQETLSAADR	C					Elution from: 30.0743 to 30.0743 RT Apex: 30.10 FinneganScanNumber: 8010
1	1	PRKDC_HUMAN	DNA-dependent protein kinase catalytic subunit OS=Homo sapiens OX=9606 GN=PRKDC PE=1 SV=3	12983	473749	663	475	246	192	62	4503	1	1	1	369.901	1106.68	3	1106.68	0	1	14.66	0.034	R	LLPAELPAKR	V					Elution from: 36.9409 to 36.9409 RT Apex: 36.95 FinneganScanNumber: 10874
1	1	PRKDC_HUMAN	DNA-dependent protein kinase catalytic subunit OS=Homo sapiens OX=9606 GN=PRKDC PE=1 SV=3	12983	473749	663	475	246	192	62	4534	1	1	1	370.53	1108.57	3	1108.57	-0.0023	1	6.48	0.22	K	SKDFVQVMR	H					Elution from: 32.8702 to 32.8702 RT Apex: 32.95 FinneganScanNumber: 9164
1	1	PRKDC_HUMAN	DNA-dependent protein kinase catalytic subunit OS=Homo sapiens OX=9606 GN=PRKDC PE=1 SV=3	12983	473749	663	475	246	192	62	4748	1	1	1	375.862	1124.56	3	1124.56	-0.0001	1	0.15	0.97	K	SKDFVQVMR	H	Oxidation (M)	0.000000020.0			Elution from: 25.1858 to 25.1858 RT Apex: 25.15 FinneganScanNumber: 6029
1	1	PRKDC_HUMAN	DNA-dependent protein kinase catalytic subunit OS=Homo sapiens OX=9606 GN=PRKDC PE=1 SV=3	12983	473749	663	475	246	192	62	4866	1	1	1	567.785	1133.56	2	1133.56	-0.0021	0	19.28	0.012	K	YSCFALFVK	F					Elution from: 66.6785 to 66.6785 RT Apex: 66.72 FinneganScanNumber: 24505
1	1	PRKDC_HUMAN	DNA-dependent protein kinase catalytic subunit OS=Homo sapiens OX=9606 GN=PRKDC PE=1 SV=3	12983	473749	663	475	246	192	62	4880	1	1	1	568.309	1134.6	2	1134.6	0.0001	0	33.27	0.00047	R	HGDLPDIQIK	H					Elution from: 43.7543 to 43.7543 RT Apex: 43.86 FinneganScanNumber: 13711
1	1	PRKDC_HUMAN	DNA-dependent protein kinase catalytic subunit OS=Homo sapiens OX=9606 GN=PRKDC PE=1 SV=3	12983	473749	663	475	246	192	62	4882	1	1	1	568.309	1134.6	2	1134.6	0.0007	0	19.33	0.012	R	HGDLPDIQIK	H					Elution from: 44.5129 to 44.5129 RT Apex: 43.86 FinneganScanNumber: 14060
1	1	PRKDC_HUMAN	DNA-dependent protein kinase catalytic subunit OS=Homo sapiens OX=9606 GN=PRKDC PE=1 SV=3	12983	473749	663	475	246	192	62	4883	1	1	1	379.209	1134.6	3	1134.6	0.001	0	14.68	0.034	R	HGDLPDIQIK	H					Elution from: 43.7833 to 43.7833 RT Apex: 43.88 FinneganScanNumber: 13727
1	1	PRKDC_HUMAN	DNA-dependent protein kinase catalytic subunit OS=Homo sapiens OX=9606 GN=PRKDC PE=1 SV=3	12983	473749	663	475	246	192	62	4957	1	1	1	570.787	1139.56	2	1139.56	-0.0055	0	14.03	0.04	R	TYSVVPMTSR	L					Elution from: 43.8189 to 43.8189 RT Apex: 43.78 FinneganScanNumber: 13742
1	1	PRKDC_HUMAN	DNA-dependent protein kinase catalytic subunit OS=Homo sapiens OX=9606 GN=PRKDC PE=1 SV=3	12983	473749	663	475	246	192	62	4959	1	1	1	570.79	1139.56	2	1139.56	0.0003	0	1.91	0.64	R	TYSVVPMTSR	L					Elution from: 44.1478 to 44.1478 RT Apex: 43.78 FinneganScanNumber: 13895
1	1	PRKDC_HUMAN	DNA-dependent protein kinase catalytic subunit OS=Homo sapiens OX=9606 GN=PRKDC PE=1 SV=3	12983	473749	663	475	246	192	62	4963	1	1	1	570.845	1139.68	2	1139.67	0.0024	0	14.63	0.034	R	ICSKPVVLPK	G					Elution from: 30.1895 to 30.1895 RT Apex: 30.30 FinneganScanNumber: 8059
1	1	PRKDC_HUMAN	DNA-dependent protein kinase catalytic subunit OS=Homo sapiens OX=9606 GN=PRKDC PE=1 SV=3	12983	473749	663	475	246	192	62	4964	1	1	1	380.899	1139.68	3	1139.67	0.003	0	9.28	0.12	R	ICSKPVVLPK	G					Elution from: 30.2073 to 30.2073 RT Apex: 30.30 FinneganScanNumber: 8066
1	1	PRKDC_HUMAN	DNA-dependent protein kinase catalytic subunit OS=Homo sapiens OX=9606 GN=PRKDC PE=1 SV=3	12983	473749	663	475	246	192	62	4981	1	1	1	381.495	1141.46	3	1141.46	0.0002	0	30.04	0.00099	K	GPESESEDHR	A					Elution from: 14.5617 to 14.5617 RT Apex: 13.57 FinneganScanNumber: 2425
1	1	PRKDC_HUMAN	DNA-dependent protein kinase catalytic subunit OS=Homo sapiens OX=9606 GN=PRKDC PE=1 SV=3	12983	473749	663	475	246	192	62	4982	1	1	1	571.739	1141.46	2	1141.46	0.0007	0	20.11	0.0098	K	GPESESEDHR	A					Elution from: 14.2860 to 14.2860 RT Apex: 13.46 FinneganScanNumber: 2366
1	1	PRKDC_HUMAN	DNA-dependent protein kinase catalytic subunit OS=Homo sapiens OX=9606 GN=PRKDC PE=1 SV=3	12983	473749	663	475	246	192	62	4984	1	1	1	381.496	1141.46	3	1141.46	0.0014	0	24.12	0.0039	K	GPESESEDHR	A					Elution from: 12.9080 to 12.9080 RT Apex: 13.46 FinneganScanNumber: 2112
1	1	PRKDC_HUMAN	DNA-dependent protein kinase catalytic subunit OS=Homo sapiens OX=9606 GN=PRKDC PE=1 SV=3	12983	473749	663	475	246	192	62	4985	1	1	1	381.496	1141.46	3	1141.46	0.0014	0	27.47	0.0018	K	GPESESEDHR	A					Elution from: 13.6648 to 13.6648 RT Apex: 13.46 FinneganScanNumber: 2252
1	1	PRKDC_HUMAN	DNA-dependent protein kinase catalytic subunit OS=Homo sapiens OX=9606 GN=PRKDC PE=1 SV=3	12983	473749	663	475	246	192	62	4986	1	1	1	571.74	1141.47	2	1141.46	0.0019	0	19.66	0.011	K	GPESESEDHR	A					Elution from: 12.7731 to 12.7731 RT Apex: 13.46 FinneganScanNumber: 2087
1	1	PRKDC_HUMAN	DNA-dependent protein kinase catalytic subunit OS=Homo sapiens OX=9606 GN=PRKDC PE=1 SV=3	12983	473749	663	475	246	192	62	4987	1	1	1	571.74	1141.47	2	1141.46	0.0021	0	35.35	0.00029	K	GPESESEDHR	A					Elution from: 13.5245 to 13.5245 RT Apex: 13.46 FinneganScanNumber: 2226
1	1	PRKDC_HUMAN	DNA-dependent protein kinase catalytic subunit OS=Homo sapiens OX=9606 GN=PRKDC PE=1 SV=3	12983	473749	663	475	246	192	62	5082	1	1	1	575.329	1148.64	2	1148.64	-0.0006	0	51.84	6.5e-06	K	AALSALESFLK	Q					Elution from: 79.4664 to 79.4664 RT Apex: 79.64 FinneganScanNumber: 30003
1	1	PRKDC_HUMAN	DNA-dependent protein kinase catalytic subunit OS=Homo sapiens OX=9606 GN=PRKDC PE=1 SV=3	12983	473749	663	475	246	192	62	5083	1	1	1	575.33	1148.64	2	1148.64	0.0006	0	16.44	0.023	K	AALSALESFLK	Q					Elution from: 81.9921 to 81.9921 RT Apex: 81.38 FinneganScanNumber: 31098
1	1	PRKDC_HUMAN	DNA-dependent protein kinase catalytic subunit OS=Homo sapiens OX=9606 GN=PRKDC PE=1 SV=3	12983	473749	663	475	246	192	62	5084	1	1	1	575.33	1148.64	2	1148.64	0.0006	0	46.84	2.1e-05	K	AALSALESFLK	Q					Elution from: 80.2255 to 80.2255 RT Apex: 79.64 FinneganScanNumber: 30343
1	1	PRKDC_HUMAN	DNA-dependent protein kinase catalytic subunit OS=Homo sapiens OX=9606 GN=PRKDC PE=1 SV=3	12983	473749	663	475	246	192	62	5167	1	1	1	578.787	1155.56	2	1155.56	0	0	7.55	0.18	R	TYSVVPMTSR	L	Oxidation (M)	0.0000002000.0			Elution from: 34.6116 to 34.6116 RT Apex: 34.79 FinneganScanNumber: 9885
1	1	PRKDC_HUMAN	DNA-dependent protein kinase catalytic subunit OS=Homo sapiens OX=9606 GN=PRKDC PE=1 SV=3	12983	473749	663	475	246	192	62	5169	1	1	1	578.795	1155.58	2	1155.58	-0.0015	0	35.69	0.00027	R	LGLPGDEVDNK	V					Elution from: 43.8685 to 43.8685 RT Apex: 43.29 FinneganScanNumber: 13764
1	1	PRKDC_HUMAN	DNA-dependent protein kinase catalytic subunit OS=Homo sapiens OX=9606 GN=PRKDC PE=1 SV=3	12983	473749	663	475	246	192	62	5170	1	1	1	578.796	1155.58	2	1155.58	0.0001	0	2.72	0.53	R	LGLPGDEVDNK	V					Elution from: 44.8385 to 44.8385 RT Apex: 43.89 FinneganScanNumber: 14219
1	1	PRKDC_HUMAN	DNA-dependent protein kinase catalytic subunit OS=Homo sapiens OX=9606 GN=PRKDC PE=1 SV=3	12983	473749	663	475	246	192	62	5171	1	1	1	578.797	1155.58	2	1155.58	0.0015	0	12.61	0.055	R	LGLPGDEVDNK	V					Elution from: 43.1140 to 43.1140 RT Apex: 43.29 FinneganScanNumber: 13415
1	1	PRKDC_HUMAN	DNA-dependent protein kinase catalytic subunit OS=Homo sapiens OX=9606 GN=PRKDC PE=1 SV=3	12983	473749	663	475	246	192	62	5186	1	1	1	579.287	1156.56	2	1156.56	-0.0013	0	1.51	0.71	R	LGLPGDEVDNK	V	Deamidated (NQ)	0.00000000010.0			Elution from: 45.5951 to 45.5951 RT Apex: 45.54 FinneganScanNumber: 14610
1	1	PRKDC_HUMAN	DNA-dependent protein kinase catalytic subunit OS=Homo sapiens OX=9606 GN=PRKDC PE=1 SV=3	12983	473749	663	475	246	192	62	5217	1	1	1	580.27	1158.53	2	1158.53	-0.0009	0	17.83	0.016	K	DLCNTHLMR	V					Elution from: 32.0632 to 32.0632 RT Apex: 32.12 FinneganScanNumber: 8826
1	1	PRKDC_HUMAN	DNA-dependent protein kinase catalytic subunit OS=Homo sapiens OX=9606 GN=PRKDC PE=1 SV=3	12983	473749	663	475	246	192	62	5218	1	1	1	387.183	1158.53	3	1158.53	-0.0002	0	22.39	0.0058	K	DLCNTHLMR	V					Elution from: 32.0295 to 32.0295 RT Apex: 32.10 FinneganScanNumber: 8815
1	1	PRKDC_HUMAN	DNA-dependent protein kinase catalytic subunit OS=Homo sapiens OX=9606 GN=PRKDC PE=1 SV=3	12983	473749	663	475	246	192	62	5369	1	1	1	585.828	1169.64	2	1169.64	0.0012	0	47.51	1.8e-05	K	QGNLSSQVPLK	R					Elution from: 36.6269 to 36.6269 RT Apex: 36.72 FinneganScanNumber: 10730
1	1	PRKDC_HUMAN	DNA-dependent protein kinase catalytic subunit OS=Homo sapiens OX=9606 GN=PRKDC PE=1 SV=3	12983	473749	663	475	246	192	62	5374	1	1	1	586.319	1170.62	2	1170.62	-0.0006	0	0.08	0.98	K	QGNLSSQVPLK	R	Deamidated (NQ)	0.00100000000.0			Elution from: 41.2637 to 41.2637 RT Apex: 41.13 FinneganScanNumber: 12568
1	1	PRKDC_HUMAN	DNA-dependent protein kinase catalytic subunit OS=Homo sapiens OX=9606 GN=PRKDC PE=1 SV=3	12983	473749	663	475	246	192	62	5406	1	1	1	588.268	1174.52	2	1174.52	-0.0005	0	11.71	0.068	K	DLCNTHLMR	V	Oxidation (M)	0.000000020.0			Elution from: 24.2048 to 24.2048 RT Apex: 24.25 FinneganScanNumber: 5603
1	1	PRKDC_HUMAN	DNA-dependent protein kinase catalytic subunit OS=Homo sapiens OX=9606 GN=PRKDC PE=1 SV=3	12983	473749	663	475	246	192	62	5412	1	1	1	588.294	1174.57	2	1174.57	0.0002	0	30.2	0.00096	K	NNWEVSALSR	A					Elution from: 48.4096 to 48.4096 RT Apex: 48.54 FinneganScanNumber: 15980
1	1	PRKDC_HUMAN	DNA-dependent protein kinase catalytic subunit OS=Homo sapiens OX=9606 GN=PRKDC PE=1 SV=3	12983	473749	663	475	246	192	62	5413	1	1	1	588.294	1174.57	2	1174.57	0.0008	0	11.61	0.069	K	NNWEVSALSR	A					Elution from: 49.1967 to 49.1967 RT Apex: 48.54 FinneganScanNumber: 16346
1	1	PRKDC_HUMAN	DNA-dependent protein kinase catalytic subunit OS=Homo sapiens OX=9606 GN=PRKDC PE=1 SV=3	12983	473749	663	475	246	192	62	5419	1	1	1	588.316	1174.62	2	1174.62	-0.0021	0	20.72	0.0085	R	VTELALTASDR	Q					Elution from: 47.4588 to 47.4588 RT Apex: 47.17 FinneganScanNumber: 15506
1	1	PRKDC_HUMAN	DNA-dependent protein kinase catalytic subunit OS=Homo sapiens OX=9606 GN=PRKDC PE=1 SV=3	12983	473749	663	475	246	192	62	5420	1	1	1	588.316	1174.62	2	1174.62	-0.0013	0	35.76	0.00027	R	VTELALTASDR	Q					Elution from: 42.8302 to 42.8302 RT Apex: 42.94 FinneganScanNumber: 13290
1	1	PRKDC_HUMAN	DNA-dependent protein kinase catalytic subunit OS=Homo sapiens OX=9606 GN=PRKDC PE=1 SV=3	12983	473749	663	475	246	192	62	5421	1	1	1	588.317	1174.62	2	1174.62	-0.0007	0	32.69	0.00054	R	VTELALTASDR	Q					Elution from: 44.4259 to 44.4259 RT Apex: 43.43 FinneganScanNumber: 14019
1	1	PRKDC_HUMAN	DNA-dependent protein kinase catalytic subunit OS=Homo sapiens OX=9606 GN=PRKDC PE=1 SV=3	12983	473749	663	475	246	192	62	5422	1	1	1	588.317	1174.62	2	1174.62	-0.0005	0	27.4	0.0018	R	VTELALTASDR	Q					Elution from: 45.1916 to 45.1916 RT Apex: 44.26 FinneganScanNumber: 14404
1	1	PRKDC_HUMAN	DNA-dependent protein kinase catalytic subunit OS=Homo sapiens OX=9606 GN=PRKDC PE=1 SV=3	12983	473749	663	475	246	192	62	5423	1	1	1	588.318	1174.62	2	1174.62	0.0025	0	25.98	0.0025	R	VTELALTASDR	Q					Elution from: 46.6139 to 46.6139 RT Apex: 45.77 FinneganScanNumber: 15083
1	1	PRKDC_HUMAN	DNA-dependent protein kinase catalytic subunit OS=Homo sapiens OX=9606 GN=PRKDC PE=1 SV=3	12983	473749	663	475	246	192	62	5428	1	1	1	588.786	1175.56	2	1175.56	0	0	9.85	0.1	K	NNWEVSALSR	A	Deamidated (NQ)	0.1000000000.0			Elution from: 59.7865 to 59.7865 RT Apex: 59.95 FinneganScanNumber: 21374
1	1	PRKDC_HUMAN	DNA-dependent protein kinase catalytic subunit OS=Homo sapiens OX=9606 GN=PRKDC PE=1 SV=3	12983	473749	663	475	246	192	62	5429	1	1	1	588.786	1175.56	2	1175.56	0.0006	0	16.94	0.02	K	NNWEVSALSR	A	Deamidated (NQ)	0.0100000000.0			Elution from: 54.8700 to 54.8700 RT Apex: 54.92 FinneganScanNumber: 18987
1	1	PRKDC_HUMAN	DNA-dependent protein kinase catalytic subunit OS=Homo sapiens OX=9606 GN=PRKDC PE=1 SV=3	12983	473749	663	475	246	192	62	5430	1	1	1	588.788	1175.56	2	1175.56	0.0012	0	35.46	0.00028	R	LACDVDQVTR	Q					Elution from: 32.5860 to 32.5860 RT Apex: 31.82 FinneganScanNumber: 9043
1	1	PRKDC_HUMAN	DNA-dependent protein kinase catalytic subunit OS=Homo sapiens OX=9606 GN=PRKDC PE=1 SV=3	12983	473749	663	475	246	192	62	5431	1	1	1	588.788	1175.56	2	1175.56	0.0012	0	36.62	0.00022	R	LACDVDQVTR	Q					Elution from: 31.7061 to 31.7061 RT Apex: 31.82 FinneganScanNumber: 8738
1	1	PRKDC_HUMAN	DNA-dependent protein kinase catalytic subunit OS=Homo sapiens OX=9606 GN=PRKDC PE=1 SV=3	12983	473749	663	475	246	192	62	5465	1	1	1	590.251	1178.49	2	1178.49	0.0005	0	8.22	0.15	K	SMEEDPQTSR	E					Elution from: 19.0579 to 19.0579 RT Apex: 19.12 FinneganScanNumber: 3555
1	1	PRKDC_HUMAN	DNA-dependent protein kinase catalytic subunit OS=Homo sapiens OX=9606 GN=PRKDC PE=1 SV=3	12983	473749	663	475	246	192	62	5485	1	1	1	590.81	1179.61	2	1179.61	-0.0013	1	38.88	0.00013	R	KQNNFSLAMK	L					Elution from: 30.7473 to 30.7473 RT Apex: 30.83 FinneganScanNumber: 8313
1	1	PRKDC_HUMAN	DNA-dependent protein kinase catalytic subunit OS=Homo sapiens OX=9606 GN=PRKDC PE=1 SV=3	12983	473749	663	475	246	192	62	5486	1	1	1	394.209	1179.61	3	1179.61	-0.0012	1	8.97	0.13	R	KQNNFSLAMK	L					Elution from: 30.7820 to 30.7820 RT Apex: 30.84 FinneganScanNumber: 8327
1	1	PRKDC_HUMAN	DNA-dependent protein kinase catalytic subunit OS=Homo sapiens OX=9606 GN=PRKDC PE=1 SV=3	12983	473749	663	475	246	192	62	5493	1	1	1	591.302	1180.59	2	1180.59	-0.0014	1	9.63	0.11	R	KQNNFSLAMK	L	Deamidated (NQ)	0.0010000000.0			Elution from: 33.7658 to 33.7658 RT Apex: 33.78 FinneganScanNumber: 9525
1	1	PRKDC_HUMAN	DNA-dependent protein kinase catalytic subunit OS=Homo sapiens OX=9606 GN=PRKDC PE=1 SV=3	12983	473749	663	475	246	192	62	5494	1	1	1	394.538	1180.59	3	1180.59	0.0009	1	1.23	0.75	R	KQNNFSLAMK	L	Deamidated (NQ)	0.0001000000.0			Elution from: 36.7959 to 36.7959 RT Apex: 36.79 FinneganScanNumber: 10811
1	1	PRKDC_HUMAN	DNA-dependent protein kinase catalytic subunit OS=Homo sapiens OX=9606 GN=PRKDC PE=1 SV=3	12983	473749	663	475	246	192	62	5496	1	1	1	394.538	1180.59	3	1180.59	0.0012	1	4.32	0.37	R	KQNNFSLAMK	L	Deamidated (NQ)	0.0010000000.0			Elution from: 35.0703 to 35.0703 RT Apex: 35.08 FinneganScanNumber: 10077
1	1	PRKDC_HUMAN	DNA-dependent protein kinase catalytic subunit OS=Homo sapiens OX=9606 GN=PRKDC PE=1 SV=3	12983	473749	663	475	246	192	62	5590	1	1	1	595.752	1189.49	2	1189.49	0.0002	0	31.22	0.00075	R	FNNYVDCMK	K					Elution from: 40.0555 to 40.0555 RT Apex: 40.13 FinneganScanNumber: 12103
1	1	PRKDC_HUMAN	DNA-dependent protein kinase catalytic subunit OS=Homo sapiens OX=9606 GN=PRKDC PE=1 SV=3	12983	473749	663	475	246	192	62	5665	1	1	1	598.332	1194.65	2	1194.65	-0.0005	0	7.7	0.17	R	GKPLPEYHVR	I					Elution from: 21.8489 to 21.8489 RT Apex: 21.95 FinneganScanNumber: 4586
1	1	PRKDC_HUMAN	DNA-dependent protein kinase catalytic subunit OS=Homo sapiens OX=9606 GN=PRKDC PE=1 SV=3	12983	473749	663	475	246	192	62	5666	1	1	1	399.224	1194.65	3	1194.65	-0.0002	0	17.41	0.018	R	GKPLPEYHVR	I					Elution from: 21.4586 to 21.4586 RT Apex: 21.95 FinneganScanNumber: 4422
1	1	PRKDC_HUMAN	DNA-dependent protein kinase catalytic subunit OS=Homo sapiens OX=9606 GN=PRKDC PE=1 SV=3	12983	473749	663	475	246	192	62	5667	1	1	1	399.225	1194.65	3	1194.65	0.001	0	13.54	0.044	R	GKPLPEYHVR	I					Elution from: 22.2189 to 22.2189 RT Apex: 21.95 FinneganScanNumber: 4741
1	1	PRKDC_HUMAN	DNA-dependent protein kinase catalytic subunit OS=Homo sapiens OX=9606 GN=PRKDC PE=1 SV=3	12983	473749	663	475	246	192	62	5674	1	1	1	598.808	1195.6	2	1195.6	-0.0005	1	2.59	0.55	R	KQNNFSLAMK	L	Oxidation (M)	0.0000000020.0			Elution from: 22.2495 to 22.2495 RT Apex: 22.41 FinneganScanNumber: 4758
1	1	PRKDC_HUMAN	DNA-dependent protein kinase catalytic subunit OS=Homo sapiens OX=9606 GN=PRKDC PE=1 SV=3	12983	473749	663	475	246	192	62	5675	1	1	1	598.808	1195.6	2	1195.6	0.0001	1	2.95	0.51	R	KQNNFSLAMK	L	Oxidation (M)	0.0000000020.0			Elution from: 30.8325 to 30.8325 RT Apex: 30.85 FinneganScanNumber: 8347
1	1	PRKDC_HUMAN	DNA-dependent protein kinase catalytic subunit OS=Homo sapiens OX=9606 GN=PRKDC PE=1 SV=3	12983	473749	663	475	246	192	62	5807	1	1	1	603.372	1204.73	2	1204.73	-0.0001	0	6.63	0.22	K	LGNPIVPLNIR	L					Elution from: 66.1024 to 66.1024 RT Apex: 66.26 FinneganScanNumber: 24250
1	1	PRKDC_HUMAN	DNA-dependent protein kinase catalytic subunit OS=Homo sapiens OX=9606 GN=PRKDC PE=1 SV=3	12983	473749	663	475	246	192	62	5808	1	1	1	402.584	1204.73	3	1204.73	0.0004	0	8.56	0.14	K	LGNPIVPLNIR	L					Elution from: 66.2011 to 66.2011 RT Apex: 66.26 FinneganScanNumber: 24289
1	1	PRKDC_HUMAN	DNA-dependent protein kinase catalytic subunit OS=Homo sapiens OX=9606 GN=PRKDC PE=1 SV=3	12983	473749	663	475	246	192	62	5878	1	1	1	605.851	1209.69	2	1209.69	-0.0005	0	47.2	1.9e-05	K	LATTILQHWK	K					Elution from: 47.6850 to 47.6850 RT Apex: 47.83 FinneganScanNumber: 15619
1	1	PRKDC_HUMAN	DNA-dependent protein kinase catalytic subunit OS=Homo sapiens OX=9606 GN=PRKDC PE=1 SV=3	12983	473749	663	475	246	192	62	5879	1	1	1	404.236	1209.69	3	1209.69	-0.0002	0	34.31	0.00037	K	LATTILQHWK	K					Elution from: 48.4186 to 48.4186 RT Apex: 47.81 FinneganScanNumber: 15984
1	1	PRKDC_HUMAN	DNA-dependent protein kinase catalytic subunit OS=Homo sapiens OX=9606 GN=PRKDC PE=1 SV=3	12983	473749	663	475	246	192	62	5880	1	1	1	404.236	1209.69	3	1209.69	-0.0002	0	37.29	0.00019	K	LATTILQHWK	K					Elution from: 47.6613 to 47.6613 RT Apex: 47.81 FinneganScanNumber: 15607
1	1	PRKDC_HUMAN	DNA-dependent protein kinase catalytic subunit OS=Homo sapiens OX=9606 GN=PRKDC PE=1 SV=3	12983	473749	663	475	246	192	62	5984	1	1	1	609.858	1217.7	2	1217.7	-0.0005	0	50.55	8.8e-06	R	LLALNSLYSPK	I					Elution from: 64.9026 to 64.9026 RT Apex: 65.05 FinneganScanNumber: 23676
1	1	PRKDC_HUMAN	DNA-dependent protein kinase catalytic subunit OS=Homo sapiens OX=9606 GN=PRKDC PE=1 SV=3	12983	473749	663	475	246	192	62	5985	1	1	1	609.859	1217.7	2	1217.7	0.0005	0	44.86	3.3e-05	R	LLALNSLYSPK	I					Elution from: 65.7917 to 65.7917 RT Apex: 65.05 FinneganScanNumber: 24092
1	1	PRKDC_HUMAN	DNA-dependent protein kinase catalytic subunit OS=Homo sapiens OX=9606 GN=PRKDC PE=1 SV=3	12983	473749	663	475	246	192	62	6015	1	1	1	611.256	1220.5	2	1220.5	0.001	0	5.63	0.27	R	TWEGWEPWM	-					Elution from: 97.6292 to 97.6292 RT Apex: 97.78 FinneganScanNumber: 36492
1	1	PRKDC_HUMAN	DNA-dependent protein kinase catalytic subunit OS=Homo sapiens OX=9606 GN=PRKDC PE=1 SV=3	12983	473749	663	475	246	192	62	6188	1	1	1	617.838	1233.66	2	1233.66	0.0009	0	11.7	0.068	R	QFINLMLPMK	E					Elution from: 80.4631 to 80.4631 RT Apex: 80.53 FinneganScanNumber: 30445
1	1	PRKDC_HUMAN	DNA-dependent protein kinase catalytic subunit OS=Homo sapiens OX=9606 GN=PRKDC PE=1 SV=3	12983	473749	663	475	246	192	62	6200	1	1	1	618.325	1234.64	2	1234.65	-0.0101	0	4.27	0.37	R	QFINLMLPMK	E	Deamidated (NQ)	0.1000000000.0			Elution from: 80.6464 to 80.6464 RT Apex: 80.59 FinneganScanNumber: 30512
1	1	PRKDC_HUMAN	DNA-dependent protein kinase catalytic subunit OS=Homo sapiens OX=9606 GN=PRKDC PE=1 SV=3	12983	473749	663	475	246	192	62	6234	1	1	1	619.834	1237.65	2	1237.65	0.0004	0	22.62	0.0055	R	AYVPALQMAFK	L					Elution from: 69.4434 to 69.4434 RT Apex: 69.54 FinneganScanNumber: 25666
1	1	PRKDC_HUMAN	DNA-dependent protein kinase catalytic subunit OS=Homo sapiens OX=9606 GN=PRKDC PE=1 SV=3	12983	473749	663	475	246	192	62	6241	1	1	1	620.323	1238.63	2	1238.63	-0.0015	0	39.36	0.00012	K	GLSSLLCNFTK	S					Elution from: 70.9142 to 70.9142 RT Apex: 71.06 FinneganScanNumber: 26291
1	1	PRKDC_HUMAN	DNA-dependent protein kinase catalytic subunit OS=Homo sapiens OX=9606 GN=PRKDC PE=1 SV=3	12983	473749	663	475	246	192	62	6242	1	1	1	620.324	1238.63	2	1238.63	0.0007	0	25.56	0.0028	K	GLSSLLCNFTK	S					Elution from: 71.8326 to 71.8326 RT Apex: 71.06 FinneganScanNumber: 26692
1	1	PRKDC_HUMAN	DNA-dependent protein kinase catalytic subunit OS=Homo sapiens OX=9606 GN=PRKDC PE=1 SV=3	12983	473749	663	475	246	192	62	6393	1	1	1	625.835	1249.66	2	1249.66	-0.0002	0	8.49	0.14	R	QFINLMLPMK	E	Oxidation (M)	0.0000020000.0			Elution from: 73.6940 to 73.6940 RT Apex: 73.67 FinneganScanNumber: 27526
1	1	PRKDC_HUMAN	DNA-dependent protein kinase catalytic subunit OS=Homo sapiens OX=9606 GN=PRKDC PE=1 SV=3	12983	473749	663	475	246	192	62	6441	1	1	1	627.831	1253.65	2	1253.65	-0.0004	0	21.8	0.0066	R	AYVPALQMAFK	L	Oxidation (M)	0.00000002000.0			Elution from: 59.0848 to 59.0848 RT Apex: 59.20 FinneganScanNumber: 21050
1	1	PRKDC_HUMAN	DNA-dependent protein kinase catalytic subunit OS=Homo sapiens OX=9606 GN=PRKDC PE=1 SV=3	12983	473749	663	475	246	192	62	6481	1	1	1	419.873	1256.6	3	1256.6	-0.0009	0	4.58	0.35	K	WCAHTNVELK	K					Elution from: 31.2880 to 31.2880 RT Apex: 31.29 FinneganScanNumber: 8548
1	1	PRKDC_HUMAN	DNA-dependent protein kinase catalytic subunit OS=Homo sapiens OX=9606 GN=PRKDC PE=1 SV=3	12983	473749	663	475	246	192	62	6531	1	1	1	631.833	1261.65	2	1261.65	-0.0006	0	21.04	0.0079	K	TLCLEVVLCR	V					Elution from: 72.4364 to 72.4364 RT Apex: 71.45 FinneganScanNumber: 26970
1	1	PRKDC_HUMAN	DNA-dependent protein kinase catalytic subunit OS=Homo sapiens OX=9606 GN=PRKDC PE=1 SV=3	12983	473749	663	475	246	192	62	6532	1	1	1	631.833	1261.65	2	1261.65	-0.0004	0	24.79	0.0033	K	TLCLEVVLCR	V					Elution from: 71.6675 to 71.6675 RT Apex: 70.67 FinneganScanNumber: 26621
1	1	PRKDC_HUMAN	DNA-dependent protein kinase catalytic subunit OS=Homo sapiens OX=9606 GN=PRKDC PE=1 SV=3	12983	473749	663	475	246	192	62	6533	1	1	1	631.833	1261.65	2	1261.65	-0.0002	0	43.6	4.4e-05	K	TLCLEVVLCR	V					Elution from: 70.7020 to 70.7020 RT Apex: 70.16 FinneganScanNumber: 26196
1	1	PRKDC_HUMAN	DNA-dependent protein kinase catalytic subunit OS=Homo sapiens OX=9606 GN=PRKDC PE=1 SV=3	12983	473749	663	475	246	192	62	6534	1	1	1	631.834	1261.65	2	1261.65	0.0012	0	42.29	5.9e-05	K	TLCLEVVLCR	V					Elution from: 69.9475 to 69.9475 RT Apex: 70.16 FinneganScanNumber: 25870
1	1	PRKDC_HUMAN	DNA-dependent protein kinase catalytic subunit OS=Homo sapiens OX=9606 GN=PRKDC PE=1 SV=3	12983	473749	663	475	246	192	62	6564	1	1	1	422.896	1265.67	3	1265.67	-0.0004	0	22.61	0.0055	R	CGAALAGHQLIR	G					Elution from: 32.3681 to 32.3681 RT Apex: 32.59 FinneganScanNumber: 8954
1	1	PRKDC_HUMAN	DNA-dependent protein kinase catalytic subunit OS=Homo sapiens OX=9606 GN=PRKDC PE=1 SV=3	12983	473749	663	475	246	192	62	6565	1	1	1	633.841	1265.67	2	1265.67	0.0004	0	52.49	5.6e-06	R	CGAALAGHQLIR	G					Elution from: 32.3812 to 32.3812 RT Apex: 32.49 FinneganScanNumber: 8961
1	1	PRKDC_HUMAN	DNA-dependent protein kinase catalytic subunit OS=Homo sapiens OX=9606 GN=PRKDC PE=1 SV=3	12983	473749	663	475	246	192	62	6713	1	1	1	426.588	1276.74	3	1276.74	0.0025	1	21.32	0.0074	K	KAALSALESFLK	Q					Elution from: 64.4992 to 64.4992 RT Apex: 64.59 FinneganScanNumber: 23492
1	1	PRKDC_HUMAN	DNA-dependent protein kinase catalytic subunit OS=Homo sapiens OX=9606 GN=PRKDC PE=1 SV=3	12983	473749	663	475	246	192	62	6714	1	1	1	639.378	1276.74	2	1276.74	0.0032	1	23.13	0.0049	K	KAALSALESFLK	Q					Elution from: 64.5418 to 64.5418 RT Apex: 64.66 FinneganScanNumber: 23509
1	1	PRKDC_HUMAN	DNA-dependent protein kinase catalytic subunit OS=Homo sapiens OX=9606 GN=PRKDC PE=1 SV=3	12983	473749	663	475	246	192	62	6792	1	1	1	428.597	1282.77	3	1282.77	0	1	23.02	0.005	K	CKIPALDLLIK	L					Elution from: 69.1490 to 69.1490 RT Apex: 69.13 FinneganScanNumber: 25534
1	1	PRKDC_HUMAN	DNA-dependent protein kinase catalytic subunit OS=Homo sapiens OX=9606 GN=PRKDC PE=1 SV=3	12983	473749	663	475	246	192	62	6820	1	1	1	643.763	1285.51	2	1285.51	-0.0003	0	22.13	0.0061	K	ECSPWMSDFK	V					Elution from: 57.0609 to 57.0609 RT Apex: 57.18 FinneganScanNumber: 20084
1	1	PRKDC_HUMAN	DNA-dependent protein kinase catalytic subunit OS=Homo sapiens OX=9606 GN=PRKDC PE=1 SV=3	12983	473749	663	475	246	192	62	6914	1	1	1	647.342	1292.67	2	1292.67	-0.0022	0	21.69	0.0068	R	DQNILLGTTYR	I					Elution from: 62.8986 to 62.8986 RT Apex: 63.02 FinneganScanNumber: 22803
1	1	PRKDC_HUMAN	DNA-dependent protein kinase catalytic subunit OS=Homo sapiens OX=9606 GN=PRKDC PE=1 SV=3	12983	473749	663	475	246	192	62	6915	1	1	1	647.342	1292.67	2	1292.67	-0.0022	0	32.44	0.00057	R	DQNILLGTTYR	I					Elution from: 57.6960 to 57.6960 RT Apex: 57.91 FinneganScanNumber: 20381
1	1	PRKDC_HUMAN	DNA-dependent protein kinase catalytic subunit OS=Homo sapiens OX=9606 GN=PRKDC PE=1 SV=3	12983	473749	663	475	246	192	62	6916	1	1	1	647.343	1292.67	2	1292.67	-0.0004	0	32.17	0.00061	R	DQNILLGTTYR	I					Elution from: 58.4646 to 58.4646 RT Apex: 57.91 FinneganScanNumber: 20760
1	1	PRKDC_HUMAN	DNA-dependent protein kinase catalytic subunit OS=Homo sapiens OX=9606 GN=PRKDC PE=1 SV=3	12983	473749	663	475	246	192	62	6933	1	1	1	647.834	1293.65	2	1293.66	-0.0032	0	8.86	0.13	R	DQNILLGTTYR	I	Deamidated (NQ)	0.00100000000.0			Elution from: 62.0525 to 62.0525 RT Apex: 62.02 FinneganScanNumber: 22408
1	1	PRKDC_HUMAN	DNA-dependent protein kinase catalytic subunit OS=Homo sapiens OX=9606 GN=PRKDC PE=1 SV=3	12983	473749	663	475	246	192	62	7015	1	1	1	650.865	1299.71	2	1299.71	0.0002	0	53.18	4.8e-06	K	QITQSALLAEAR	S					Elution from: 48.9009 to 48.9009 RT Apex: 48.30 FinneganScanNumber: 16207
1	1	PRKDC_HUMAN	DNA-dependent protein kinase catalytic subunit OS=Homo sapiens OX=9606 GN=PRKDC PE=1 SV=3	12983	473749	663	475	246	192	62	7016	1	1	1	650.865	1299.72	2	1299.71	0.0008	0	28.77	0.0013	K	QITQSALLAEAR	S					Elution from: 71.3506 to 71.3506 RT Apex: 71.43 FinneganScanNumber: 26486
1	1	PRKDC_HUMAN	DNA-dependent protein kinase catalytic subunit OS=Homo sapiens OX=9606 GN=PRKDC PE=1 SV=3	12983	473749	663	475	246	192	62	7017	1	1	1	650.866	1299.72	2	1299.71	0.002	0	51.67	6.8e-06	K	QITQSALLAEAR	S					Elution from: 48.1453 to 48.1453 RT Apex: 48.30 FinneganScanNumber: 15845
1	1	PRKDC_HUMAN	DNA-dependent protein kinase catalytic subunit OS=Homo sapiens OX=9606 GN=PRKDC PE=1 SV=3	12983	473749	663	475	246	192	62	7100	1	1	1	653.838	1305.66	2	1305.66	-0.0026	0	8.64	0.14	K	DILPCLDGYLK	T					Elution from: 85.2363 to 85.2363 RT Apex: 84.24 FinneganScanNumber: 32409
1	1	PRKDC_HUMAN	DNA-dependent protein kinase catalytic subunit OS=Homo sapiens OX=9606 GN=PRKDC PE=1 SV=3	12983	473749	663	475	246	192	62	7101	1	1	1	653.839	1305.66	2	1305.66	-0.0004	0	16	0.025	K	DILPCLDGYLK	T					Elution from: 91.9602 to 91.9602 RT Apex: 0.00 FinneganScanNumber: 34738
1	1	PRKDC_HUMAN	DNA-dependent protein kinase catalytic subunit OS=Homo sapiens OX=9606 GN=PRKDC PE=1 SV=3	12983	473749	663	475	246	192	62	7102	1	1	1	653.839	1305.66	2	1305.66	0.0004	0	20.33	0.0093	K	DILPCLDGYLK	T					Elution from: 84.2750 to 84.2750 RT Apex: 84.09 FinneganScanNumber: 32032
1	1	PRKDC_HUMAN	DNA-dependent protein kinase catalytic subunit OS=Homo sapiens OX=9606 GN=PRKDC PE=1 SV=3	12983	473749	663	475	246	192	62	7170	1	1	1	656.329	1310.64	2	1310.64	0.0015	0	40.96	8e-05	R	YPEETLSLMTK	E					Elution from: 56.0419 to 56.0419 RT Apex: 56.27 FinneganScanNumber: 19564
1	1	PRKDC_HUMAN	DNA-dependent protein kinase catalytic subunit OS=Homo sapiens OX=9606 GN=PRKDC PE=1 SV=3	12983	473749	663	475	246	192	62	7304	1	1	1	660.817	1319.62	2	1319.62	-0.0013	0	39.1	0.00012	R	QCLPSLDLSCK	Q					Elution from: 55.4677 to 55.4677 RT Apex: 54.86 FinneganScanNumber: 19278
1	1	PRKDC_HUMAN	DNA-dependent protein kinase catalytic subunit OS=Homo sapiens OX=9606 GN=PRKDC PE=1 SV=3	12983	473749	663	475	246	192	62	7305	1	1	1	660.818	1319.62	2	1319.62	0.0005	0	42.3	5.9e-05	R	QCLPSLDLSCK	Q					Elution from: 54.7030 to 54.7030 RT Apex: 54.86 FinneganScanNumber: 18917
1	1	PRKDC_HUMAN	DNA-dependent protein kinase catalytic subunit OS=Homo sapiens OX=9606 GN=PRKDC PE=1 SV=3	12983	473749	663	475	246	192	62	7338	1	1	1	441.564	1321.67	3	1321.67	0.0005	0	37.01	0.0002	R	MSTSPEAFLALR	S					Elution from: 69.5198 to 69.5198 RT Apex: 69.51 FinneganScanNumber: 25698
1	1	PRKDC_HUMAN	DNA-dependent protein kinase catalytic subunit OS=Homo sapiens OX=9606 GN=PRKDC PE=1 SV=3	12983	473749	663	475	246	192	62	7397	1	1	1	663.877	1325.74	2	1325.74	-0.0029	1	53.66	4.3e-06	K	QGNLSSQVPLKR	L					Elution from: 28.9650 to 28.9650 RT Apex: 29.03 FinneganScanNumber: 7580
1	1	PRKDC_HUMAN	DNA-dependent protein kinase catalytic subunit OS=Homo sapiens OX=9606 GN=PRKDC PE=1 SV=3	12983	473749	663	475	246	192	62	7398	1	1	1	442.921	1325.74	3	1325.74	-0.0007	1	17.53	0.018	K	QGNLSSQVPLKR	L					Elution from: 28.9447 to 28.9447 RT Apex: 29.03 FinneganScanNumber: 7568
1	1	PRKDC_HUMAN	DNA-dependent protein kinase catalytic subunit OS=Homo sapiens OX=9606 GN=PRKDC PE=1 SV=3	12983	473749	663	475	246	192	62	7404	1	1	1	664.312	1326.61	2	1326.61	-0.0006	0	34.51	0.00035	K	HDVGAYMLMYK	G					Elution from: 51.8810 to 51.8810 RT Apex: 51.93 FinneganScanNumber: 17674
1	1	PRKDC_HUMAN	DNA-dependent protein kinase catalytic subunit OS=Homo sapiens OX=9606 GN=PRKDC PE=1 SV=3	12983	473749	663	475	246	192	62	7406	1	1	1	664.326	1326.64	2	1326.64	-0.0012	0	14.22	0.038	R	YPEETLSLMTK	E	Oxidation (M)	0.00000000200.0			Elution from: 48.6570 to 48.6570 RT Apex: 47.86 FinneganScanNumber: 16090
1	1	PRKDC_HUMAN	DNA-dependent protein kinase catalytic subunit OS=Homo sapiens OX=9606 GN=PRKDC PE=1 SV=3	12983	473749	663	475	246	192	62	7407	1	1	1	664.326	1326.64	2	1326.64	-0.0008	0	33.69	0.00043	R	YPEETLSLMTK	E	Oxidation (M)	0.00000000200.0			Elution from: 46.9167 to 46.9167 RT Apex: 46.93 FinneganScanNumber: 15224
1	1	PRKDC_HUMAN	DNA-dependent protein kinase catalytic subunit OS=Homo sapiens OX=9606 GN=PRKDC PE=1 SV=3	12983	473749	663	475	246	192	62	7518	1	1	1	669.84	1337.66	2	1337.66	-0.0003	0	30.47	0.0009	R	MSTSPEAFLALR	S	Oxidation (M)	0.200000000000.0			Elution from: 63.8579 to 63.8579 RT Apex: 63.89 FinneganScanNumber: 23208
1	1	PRKDC_HUMAN	DNA-dependent protein kinase catalytic subunit OS=Homo sapiens OX=9606 GN=PRKDC PE=1 SV=3	12983	473749	663	475	246	192	62	7519	1	1	1	669.86	1337.7	2	1337.71	-0.0041	0	31.39	0.00073	R	LGASLAFNNIYR	E					Elution from: 63.6140 to 63.6140 RT Apex: 62.99 FinneganScanNumber: 23120
1	1	PRKDC_HUMAN	DNA-dependent protein kinase catalytic subunit OS=Homo sapiens OX=9606 GN=PRKDC PE=1 SV=3	12983	473749	663	475	246	192	62	7520	1	1	1	669.861	1337.71	2	1337.71	-0.0007	0	11.84	0.065	R	LGASLAFNNIYR	E					Elution from: 62.8417 to 62.8417 RT Apex: 62.99 FinneganScanNumber: 22779
1	1	PRKDC_HUMAN	DNA-dependent protein kinase catalytic subunit OS=Homo sapiens OX=9606 GN=PRKDC PE=1 SV=3	12983	473749	663	475	246	192	62	7521	1	1	1	446.91	1337.71	3	1337.71	0.0002	0	21.68	0.0068	R	LGASLAFNNIYR	E					Elution from: 62.9642 to 62.9642 RT Apex: 63.01 FinneganScanNumber: 22834
1	1	PRKDC_HUMAN	DNA-dependent protein kinase catalytic subunit OS=Homo sapiens OX=9606 GN=PRKDC PE=1 SV=3	12983	473749	663	475	246	192	62	7532	1	1	1	670.353	1338.69	2	1338.69	-0.0009	0	13.4	0.046	R	LGASLAFNNIYR	E	Deamidated (NQ)	0.000000010000.0			Elution from: 64.8834 to 64.8834 RT Apex: 65.10 FinneganScanNumber: 23667
1	1	PRKDC_HUMAN	DNA-dependent protein kinase catalytic subunit OS=Homo sapiens OX=9606 GN=PRKDC PE=1 SV=3	12983	473749	663	475	246	192	62	7533	1	1	1	670.354	1338.69	2	1338.69	-0.0007	0	10.41	0.091	R	LGASLAFNNIYR	E	Deamidated (NQ)	0.000000010000.0			Elution from: 66.4793 to 66.4793 RT Apex: 66.22 FinneganScanNumber: 24409
1	1	PRKDC_HUMAN	DNA-dependent protein kinase catalytic subunit OS=Homo sapiens OX=9606 GN=PRKDC PE=1 SV=3	12983	473749	663	475	246	192	62	7534	1	1	1	670.354	1338.69	2	1338.69	0.0007	0	5.45	0.29	R	LGASLAFNNIYR	E	Deamidated (NQ)	0.000000010000.0			Elution from: 65.7242 to 65.7242 RT Apex: 65.10 FinneganScanNumber: 24060
1	1	PRKDC_HUMAN	DNA-dependent protein kinase catalytic subunit OS=Homo sapiens OX=9606 GN=PRKDC PE=1 SV=3	12983	473749	663	475	246	192	62	7539	1	1	1	670.384	1338.75	2	1338.75	-0.0005	0	48.47	1.4e-05	K	QLFSSLFSGILK	E					Elution from: 93.5403 to 93.5403 RT Apex: 93.72 FinneganScanNumber: 35228
1	1	PRKDC_HUMAN	DNA-dependent protein kinase catalytic subunit OS=Homo sapiens OX=9606 GN=PRKDC PE=1 SV=3	12983	473749	663	475	246	192	62	7540	1	1	1	670.385	1338.75	2	1338.75	-0.0003	0	40.77	8.4e-05	K	QLFSSLFSGILK	E					Elution from: 95.0845 to 95.0845 RT Apex: 95.02 FinneganScanNumber: 35733
1	1	PRKDC_HUMAN	DNA-dependent protein kinase catalytic subunit OS=Homo sapiens OX=9606 GN=PRKDC PE=1 SV=3	12983	473749	663	475	246	192	62	7541	1	1	1	670.385	1338.76	2	1338.75	0.0003	0	49.15	1.2e-05	K	QLFSSLFSGILK	E					Elution from: 94.2983 to 94.2983 RT Apex: 93.72 FinneganScanNumber: 35479
1	1	PRKDC_HUMAN	DNA-dependent protein kinase catalytic subunit OS=Homo sapiens OX=9606 GN=PRKDC PE=1 SV=3	12983	473749	663	475	246	192	62	7542	1	1	1	670.386	1338.76	2	1338.75	0.0023	0	31.21	0.00076	K	QLFSSLFSGILK	E					Elution from: 91.1574 to 91.1574 RT Apex: 91.25 FinneganScanNumber: 34470
1	1	PRKDC_HUMAN	DNA-dependent protein kinase catalytic subunit OS=Homo sapiens OX=9606 GN=PRKDC PE=1 SV=3	12983	473749	663	475	246	192	62	7582	1	1	1	671.865	1341.72	2	1341.72	0.0001	0	14.97	0.032	R	FMNAVFFLLPK	F	Oxidation (M)	0.02000000000.0			Elution from: 87.3715 to 87.3715 RT Apex: 87.38 FinneganScanNumber: 33118
1	1	PRKDC_HUMAN	DNA-dependent protein kinase catalytic subunit OS=Homo sapiens OX=9606 GN=PRKDC PE=1 SV=3	12983	473749	663	475	246	192	62	7690	1	1	1	675.859	1349.7	2	1349.71	-0.0085	1	20.21	0.0095	K	MKQDAQVVLYR	S					Elution from: 33.5269 to 33.5269 RT Apex: 33.60 FinneganScanNumber: 9424
1	1	PRKDC_HUMAN	DNA-dependent protein kinase catalytic subunit OS=Homo sapiens OX=9606 GN=PRKDC PE=1 SV=3	12983	473749	663	475	246	192	62	7894	1	1	1	456.244	1365.71	3	1365.71	0.0027	1	12.82	0.052	K	MKQDAQVVLYR	S	Oxidation (M)	0.20000000000.0			Elution from: 30.1037 to 30.1037 RT Apex: 30.32 FinneganScanNumber: 8026
1	1	PRKDC_HUMAN	DNA-dependent protein kinase catalytic subunit OS=Homo sapiens OX=9606 GN=PRKDC PE=1 SV=3	12983	473749	663	475	246	192	62	7937	1	1	1	685.352	1368.69	2	1368.69	0.0005	0	38.02	0.00016	R	HECMAPLTALVK	H					Elution from: 51.8399 to 51.8399 RT Apex: 51.92 FinneganScanNumber: 17653
1	1	PRKDC_HUMAN	DNA-dependent protein kinase catalytic subunit OS=Homo sapiens OX=9606 GN=PRKDC PE=1 SV=3	12983	473749	663	475	246	192	62	7938	1	1	1	457.237	1368.69	3	1368.69	0.001	0	23.19	0.0048	R	HECMAPLTALVK	H					Elution from: 51.8131 to 51.8131 RT Apex: 51.93 FinneganScanNumber: 17642
1	1	PRKDC_HUMAN	DNA-dependent protein kinase catalytic subunit OS=Homo sapiens OX=9606 GN=PRKDC PE=1 SV=3	12983	473749	663	475	246	192	62	7990	1	1	1	687.382	1372.75	2	1372.75	-0.0006	0	47.51	1.8e-05	R	LYSLALHPNAFK	R					Elution from: 52.6995 to 52.6995 RT Apex: 52.79 FinneganScanNumber: 18068
1	1	PRKDC_HUMAN	DNA-dependent protein kinase catalytic subunit OS=Homo sapiens OX=9606 GN=PRKDC PE=1 SV=3	12983	473749	663	475	246	192	62	7991	1	1	1	458.591	1372.75	3	1372.75	0	0	24.38	0.0036	R	LYSLALHPNAFK	R					Elution from: 52.6829 to 52.6829 RT Apex: 52.79 FinneganScanNumber: 18062
1	1	PRKDC_HUMAN	DNA-dependent protein kinase catalytic subunit OS=Homo sapiens OX=9606 GN=PRKDC PE=1 SV=3	12983	473749	663	475	246	192	62	8006	1	1	1	458.918	1373.73	3	1373.73	-0.0009	0	31.36	0.00073	R	LYSLALHPNAFK	R	Deamidated (NQ)	0.000000001000.0			Elution from: 57.4522 to 57.4522 RT Apex: 57.52 FinneganScanNumber: 20264
1	1	PRKDC_HUMAN	DNA-dependent protein kinase catalytic subunit OS=Homo sapiens OX=9606 GN=PRKDC PE=1 SV=3	12983	473749	663	475	246	192	62	8007	1	1	1	458.919	1373.73	3	1373.73	-0.0003	0	48.16	1.5e-05	R	LYSLALHPNAFK	R	Deamidated (NQ)	0.000000001000.0			Elution from: 58.4674 to 58.4674 RT Apex: 58.54 FinneganScanNumber: 20762
1	1	PRKDC_HUMAN	DNA-dependent protein kinase catalytic subunit OS=Homo sapiens OX=9606 GN=PRKDC PE=1 SV=3	12983	473749	663	475	246	192	62	8152	1	1	1	692.87	1383.73	2	1383.72	0.0015	1	6.47	0.23	R	LGLPGDEVDNKVK	G	Deamidated (NQ)	0.0000000001000.0			Elution from: 41.3780 to 41.3780 RT Apex: 41.34 FinneganScanNumber: 12623
1	1	PRKDC_HUMAN	DNA-dependent protein kinase catalytic subunit OS=Homo sapiens OX=9606 GN=PRKDC PE=1 SV=3	12983	473749	663	475	246	192	62	8160	1	1	1	462.568	1384.68	3	1384.68	-0.0024	0	3.59	0.44	R	HECMAPLTALVK	H	Oxidation (M)	0.000200000000.0			Elution from: 42.3836 to 42.3836 RT Apex: 42.61 FinneganScanNumber: 13074
1	1	PRKDC_HUMAN	DNA-dependent protein kinase catalytic subunit OS=Homo sapiens OX=9606 GN=PRKDC PE=1 SV=3	12983	473749	663	475	246	192	62	8162	1	1	1	693.35	1384.68	2	1384.68	0.0004	0	26.9	0.002	R	HECMAPLTALVK	H	Oxidation (M)	0.000200000000.0			Elution from: 42.2919 to 42.2919 RT Apex: 42.56 FinneganScanNumber: 13029
1	1	PRKDC_HUMAN	DNA-dependent protein kinase catalytic subunit OS=Homo sapiens OX=9606 GN=PRKDC PE=1 SV=3	12983	473749	663	475	246	192	62	8216	1	1	1	695.833	1389.65	2	1389.65	-0.001	0	20.99	0.008	R	NELEIPGQYDGR	G					Elution from: 49.7958 to 49.7958 RT Apex: 49.94 FinneganScanNumber: 16659
1	1	PRKDC_HUMAN	DNA-dependent protein kinase catalytic subunit OS=Homo sapiens OX=9606 GN=PRKDC PE=1 SV=3	12983	473749	663	475	246	192	62	8217	1	1	1	464.225	1389.65	3	1389.65	0.0007	0	24.44	0.0036	R	NELEIPGQYDGR	G					Elution from: 49.9006 to 49.9006 RT Apex: 49.91 FinneganScanNumber: 16717
1	1	PRKDC_HUMAN	DNA-dependent protein kinase catalytic subunit OS=Homo sapiens OX=9606 GN=PRKDC PE=1 SV=3	12983	473749	663	475	246	192	62	8218	1	1	1	695.834	1389.65	2	1389.65	0.0012	0	23.27	0.0047	R	NELEIPGQYDGR	G					Elution from: 50.5653 to 50.5653 RT Apex: 49.94 FinneganScanNumber: 17027
1	1	PRKDC_HUMAN	DNA-dependent protein kinase catalytic subunit OS=Homo sapiens OX=9606 GN=PRKDC PE=1 SV=3	12983	473749	663	475	246	192	62	8231	1	1	1	696.325	1390.64	2	1390.64	-0.0002	0	12.77	0.053	R	NELEIPGQYDGR	G	Deamidated (NQ)	0.100000000000.0			Elution from: 60.3079 to 60.3079 RT Apex: 60.39 FinneganScanNumber: 21619
1	1	PRKDC_HUMAN	DNA-dependent protein kinase catalytic subunit OS=Homo sapiens OX=9606 GN=PRKDC PE=1 SV=3	12983	473749	663	475	246	192	62	8313	1	1	1	698.851	1395.69	2	1395.69	-0.0011	0	19.56	0.011	K	LNESTFDTQITK	K					Elution from: 44.2854 to 44.2854 RT Apex: 44.32 FinneganScanNumber: 13963
1	1	PRKDC_HUMAN	DNA-dependent protein kinase catalytic subunit OS=Homo sapiens OX=9606 GN=PRKDC PE=1 SV=3	12983	473749	663	475	246	192	62	8314	1	1	1	698.851	1395.69	2	1395.69	-0.0007	0	41.6	6.9e-05	K	LNESTFDTQITK	K					Elution from: 45.7998 to 45.7998 RT Apex: 45.01 FinneganScanNumber: 14702
1	1	PRKDC_HUMAN	DNA-dependent protein kinase catalytic subunit OS=Homo sapiens OX=9606 GN=PRKDC PE=1 SV=3	12983	473749	663	475	246	192	62	8315	1	1	1	698.852	1395.69	2	1395.69	0.0015	0	44.12	3.9e-05	K	LNESTFDTQITK	K					Elution from: 45.0453 to 45.0453 RT Apex: 45.01 FinneganScanNumber: 14324
1	1	PRKDC_HUMAN	DNA-dependent protein kinase catalytic subunit OS=Homo sapiens OX=9606 GN=PRKDC PE=1 SV=3	12983	473749	663	475	246	192	62	8330	1	1	1	699.343	1396.67	2	1396.67	-0.0013	0	32.48	0.00056	K	LNESTFDTQITK	K	Deamidated (NQ)	0.010000000000.0			Elution from: 50.6295 to 50.6295 RT Apex: 50.64 FinneganScanNumber: 17057
1	1	PRKDC_HUMAN	DNA-dependent protein kinase catalytic subunit OS=Homo sapiens OX=9606 GN=PRKDC PE=1 SV=3	12983	473749	663	475	246	192	62	8331	1	1	1	699.343	1396.67	2	1396.67	0.0001	0	56.51	2.2e-06	K	LNESTFDTQITK	K	Deamidated (NQ)	0.010000000000.0			Elution from: 49.6560 to 49.6560 RT Apex: 49.68 FinneganScanNumber: 16586
1	1	PRKDC_HUMAN	DNA-dependent protein kinase catalytic subunit OS=Homo sapiens OX=9606 GN=PRKDC PE=1 SV=3	12983	473749	663	475	246	192	62	8795	1	1	1	477.581	1429.72	3	1429.72	0.001	0	46.26	2.4e-05	K	GGSWIQEINVAEK	N					Elution from: 61.8139 to 61.8139 RT Apex: 61.87 FinneganScanNumber: 22288
1	1	PRKDC_HUMAN	DNA-dependent protein kinase catalytic subunit OS=Homo sapiens OX=9606 GN=PRKDC PE=1 SV=3	12983	473749	663	475	246	192	62	8796	1	1	1	715.868	1429.72	2	1429.72	0.0017	0	36.11	0.00024	K	GGSWIQEINVAEK	N					Elution from: 61.6927 to 61.6927 RT Apex: 61.83 FinneganScanNumber: 22237
1	1	PRKDC_HUMAN	DNA-dependent protein kinase catalytic subunit OS=Homo sapiens OX=9606 GN=PRKDC PE=1 SV=3	12983	473749	663	475	246	192	62	8866	1	1	1	718.85	1435.69	2	1435.69	-0.0004	0	36.15	0.00024	K	DLLLNTMSQEEK	A	Oxidation (M)	0.000000200000.0			Elution from: 47.8191 to 47.8191 RT Apex: 47.93 FinneganScanNumber: 15689
1	1	PRKDC_HUMAN	DNA-dependent protein kinase catalytic subunit OS=Homo sapiens OX=9606 GN=PRKDC PE=1 SV=3	12983	473749	663	475	246	192	62	8960	1	1	1	722.403	1442.79	2	1442.79	-0.0003	0	58.48	1.4e-06	R	VVQMLGSLGGQINK	N					Elution from: 58.1287 to 58.1287 RT Apex: 58.26 FinneganScanNumber: 20587
1	1	PRKDC_HUMAN	DNA-dependent protein kinase catalytic subunit OS=Homo sapiens OX=9606 GN=PRKDC PE=1 SV=3	12983	473749	663	475	246	192	62	8961	1	1	1	481.938	1442.79	3	1442.79	0.0006	0	25.79	0.0026	R	VVQMLGSLGGQINK	N					Elution from: 58.4036 to 58.4036 RT Apex: 58.29 FinneganScanNumber: 20726
1	1	PRKDC_HUMAN	DNA-dependent protein kinase catalytic subunit OS=Homo sapiens OX=9606 GN=PRKDC PE=1 SV=3	12983	473749	663	475	246	192	62	8972	1	1	1	722.923	1443.83	2	1443.83	-0.0016	0	5.82	0.26	K	NLLIFENLIDLK	R					Elution from: 101.0431 to 101.0431 RT Apex: 100.06 FinneganScanNumber: 37700
1	1	PRKDC_HUMAN	DNA-dependent protein kinase catalytic subunit OS=Homo sapiens OX=9606 GN=PRKDC PE=1 SV=3	12983	473749	663	475	246	192	62	8974	1	1	1	722.924	1443.83	2	1443.83	-0.0008	0	13.01	0.05	K	NLLIFENLIDLK	R					Elution from: 99.4320 to 99.4320 RT Apex: 99.37 FinneganScanNumber: 36905
1	1	PRKDC_HUMAN	DNA-dependent protein kinase catalytic subunit OS=Homo sapiens OX=9606 GN=PRKDC PE=1 SV=3	12983	473749	663	475	246	192	62	8975	1	1	1	722.924	1443.83	2	1443.83	0.0006	0	22.19	0.006	K	NLLIFENLIDLK	R					Elution from: 97.2400 to 97.2400 RT Apex: 97.23 FinneganScanNumber: 36382
1	1	PRKDC_HUMAN	DNA-dependent protein kinase catalytic subunit OS=Homo sapiens OX=9606 GN=PRKDC PE=1 SV=3	12983	473749	663	475	246	192	62	8976	1	1	1	722.924	1443.83	2	1443.83	0.0008	0	13.71	0.043	K	NLLIFENLIDLK	R					Elution from: 106.0545 to 106.0545 RT Apex: 0.00 FinneganScanNumber: 38715
1	1	PRKDC_HUMAN	DNA-dependent protein kinase catalytic subunit OS=Homo sapiens OX=9606 GN=PRKDC PE=1 SV=3	12983	473749	663	475	246	192	62	8977	1	1	1	722.925	1443.83	2	1443.83	0.001	0	37.27	0.00019	K	NLLIFENLIDLK	R					Elution from: 100.1884 to 100.1884 RT Apex: 100.06 FinneganScanNumber: 37240
1	1	PRKDC_HUMAN	DNA-dependent protein kinase catalytic subunit OS=Homo sapiens OX=9606 GN=PRKDC PE=1 SV=3	12983	473749	663	475	246	192	62	9034	1	1	1	724.871	1447.73	2	1447.73	-0.0058	0	42.72	5.3e-05	R	SQGCSEQVLTVLK	T					Elution from: 52.3056 to 52.3056 RT Apex: 51.68 FinneganScanNumber: 17879
1	1	PRKDC_HUMAN	DNA-dependent protein kinase catalytic subunit OS=Homo sapiens OX=9606 GN=PRKDC PE=1 SV=3	12983	473749	663	475	246	192	62	9035	1	1	1	724.875	1447.73	2	1447.73	0.0006	0	58.3	1.5e-06	R	SQGCSEQVLTVLK	T					Elution from: 51.5428 to 51.5428 RT Apex: 51.68 FinneganScanNumber: 17514
1	1	PRKDC_HUMAN	DNA-dependent protein kinase catalytic subunit OS=Homo sapiens OX=9606 GN=PRKDC PE=1 SV=3	12983	473749	663	475	246	192	62	9036	1	1	1	483.586	1447.74	3	1447.73	0.0012	0	54.53	3.5e-06	R	SQGCSEQVLTVLK	T					Elution from: 51.6092 to 51.6092 RT Apex: 51.66 FinneganScanNumber: 17549
1	1	PRKDC_HUMAN	DNA-dependent protein kinase catalytic subunit OS=Homo sapiens OX=9606 GN=PRKDC PE=1 SV=3	12983	473749	663	475	246	192	62	9147	1	1	1	729.37	1456.73	2	1456.73	-0.0007	0	57.16	1.9e-06	R	VEGMTELYFQLK	S					Elution from: 73.6807 to 73.6807 RT Apex: 73.86 FinneganScanNumber: 27519
1	1	PRKDC_HUMAN	DNA-dependent protein kinase catalytic subunit OS=Homo sapiens OX=9606 GN=PRKDC PE=1 SV=3	12983	473749	663	475	246	192	62	9174	1	1	1	730.401	1458.79	2	1458.79	0.0006	0	55.71	2.7e-06	R	VVQMLGSLGGQINK	N	Oxidation (M)	0.00020000000000.0			Elution from: 46.0639 to 46.0639 RT Apex: 46.16 FinneganScanNumber: 14823
1	1	PRKDC_HUMAN	DNA-dependent protein kinase catalytic subunit OS=Homo sapiens OX=9606 GN=PRKDC PE=1 SV=3	12983	473749	663	475	246	192	62	9182	2	1	1	730.891	1459.77	2	1459.77	-0.0036	0	0	1	R	VVQMLGSLGGQINK	N	Deamidated (NQ); Oxidation (M)	0.00120000000000.0			Elution from: 48.0806 to 48.0806 RT Apex: 48.14 FinneganScanNumber: 15818
1	1	PRKDC_HUMAN	DNA-dependent protein kinase catalytic subunit OS=Homo sapiens OX=9606 GN=PRKDC PE=1 SV=3	12983	473749	663	475	246	192	62	9273	1	1	1	734.356	1466.7	2	1466.7	-0.0027	0	50.47	9e-06	R	SLGPPQGEEDSVPR	D					Elution from: 37.3339 to 37.3339 RT Apex: 37.44 FinneganScanNumber: 11031
1	1	PRKDC_HUMAN	DNA-dependent protein kinase catalytic subunit OS=Homo sapiens OX=9606 GN=PRKDC PE=1 SV=3	12983	473749	663	475	246	192	62	9274	1	1	1	734.356	1466.7	2	1466.7	-0.0017	0	53.9	4.1e-06	R	SLGPPQGEEDSVPR	D					Elution from: 38.4571 to 38.4571 RT Apex: 38.66 FinneganScanNumber: 11455
1	1	PRKDC_HUMAN	DNA-dependent protein kinase catalytic subunit OS=Homo sapiens OX=9606 GN=PRKDC PE=1 SV=3	12983	473749	663	475	246	192	62	9275	1	1	1	734.357	1466.7	2	1466.7	0.0001	0	55.85	2.6e-06	R	SLGPPQGEEDSVPR	D					Elution from: 39.2259 to 39.2259 RT Apex: 38.66 FinneganScanNumber: 11759
1	1	PRKDC_HUMAN	DNA-dependent protein kinase catalytic subunit OS=Homo sapiens OX=9606 GN=PRKDC PE=1 SV=3	12983	473749	663	475	246	192	62	9276	1	1	1	489.908	1466.7	3	1466.7	0.0014	0	33.49	0.00045	R	SLGPPQGEEDSVPR	D					Elution from: 38.5524 to 38.5524 RT Apex: 38.61 FinneganScanNumber: 11496
1	1	PRKDC_HUMAN	DNA-dependent protein kinase catalytic subunit OS=Homo sapiens OX=9606 GN=PRKDC PE=1 SV=3	12983	473749	663	475	246	192	62	9285	1	1	1	734.855	1467.69	2	1467.69	-0.0003	0	48.56	1.4e-05	K	NLLTVTSSDEMMK	S					Elution from: 58.2500 to 58.2500 RT Apex: 58.34 FinneganScanNumber: 20648
1	1	PRKDC_HUMAN	DNA-dependent protein kinase catalytic subunit OS=Homo sapiens OX=9606 GN=PRKDC PE=1 SV=3	12983	473749	663	475	246	192	62	9423	1	1	1	740.851	1479.69	2	1479.69	-0.0058	0	16.94	0.02	R	ILELSGSSSEDSEK	V					Elution from: 44.0275 to 44.0275 RT Apex: 45.01 FinneganScanNumber: 13838
1	1	PRKDC_HUMAN	DNA-dependent protein kinase catalytic subunit OS=Homo sapiens OX=9606 GN=PRKDC PE=1 SV=3	12983	473749	663	475	246	192	62	9424	1	1	1	740.852	1479.69	2	1479.69	-0.0046	0	45.73	2.7e-05	R	ILELSGSSSEDSEK	V					Elution from: 40.8722 to 40.8722 RT Apex: 40.24 FinneganScanNumber: 12412
1	1	PRKDC_HUMAN	DNA-dependent protein kinase catalytic subunit OS=Homo sapiens OX=9606 GN=PRKDC PE=1 SV=3	12983	473749	663	475	246	192	62	9425	1	1	1	740.853	1479.69	2	1479.69	-0.0018	0	40.8	8.3e-05	R	ILELSGSSSEDSEK	V					Elution from: 38.3895 to 38.3895 RT Apex: 38.74 FinneganScanNumber: 11422
1	1	PRKDC_HUMAN	DNA-dependent protein kinase catalytic subunit OS=Homo sapiens OX=9606 GN=PRKDC PE=1 SV=3	12983	473749	663	475	246	192	62	9426	1	1	1	740.854	1479.69	2	1479.69	-0.0016	0	52.12	6.1e-06	R	ILELSGSSSEDSEK	V					Elution from: 41.8024 to 41.8024 RT Apex: 41.00 FinneganScanNumber: 12810
1	1	PRKDC_HUMAN	DNA-dependent protein kinase catalytic subunit OS=Homo sapiens OX=9606 GN=PRKDC PE=1 SV=3	12983	473749	663	475	246	192	62	9427	1	1	1	740.854	1479.69	2	1479.69	0.0002	0	64	4e-07	R	ILELSGSSSEDSEK	V					Elution from: 39.1453 to 39.1453 RT Apex: 38.74 FinneganScanNumber: 11723
1	1	PRKDC_HUMAN	DNA-dependent protein kinase catalytic subunit OS=Homo sapiens OX=9606 GN=PRKDC PE=1 SV=3	12983	473749	663	475	246	192	62	9428	1	1	1	740.856	1479.7	2	1479.69	0.0038	0	50.7	8.5e-06	R	ILELSGSSSEDSEK	V					Elution from: 40.1102 to 40.1102 RT Apex: 39.12 FinneganScanNumber: 12121
1	1	PRKDC_HUMAN	DNA-dependent protein kinase catalytic subunit OS=Homo sapiens OX=9606 GN=PRKDC PE=1 SV=3	12983	473749	663	475	246	192	62	9480	1	1	1	742.852	1483.69	2	1483.69	-0.001	0	21.89	0.0065	K	NLLTVTSSDEMMK	S	Oxidation (M)	0.0000000000020.0			Elution from: 49.3228 to 49.3228 RT Apex: 49.33 FinneganScanNumber: 16414
1	1	PRKDC_HUMAN	DNA-dependent protein kinase catalytic subunit OS=Homo sapiens OX=9606 GN=PRKDC PE=1 SV=3	12983	473749	663	475	246	192	62	9641	1	1	1	499.604	1495.79	3	1495.79	-0.0016	0	28.03	0.0016	R	NCISTVVHQGLIR	I					Elution from: 45.6974 to 45.6974 RT Apex: 45.85 FinneganScanNumber: 14656
1	1	PRKDC_HUMAN	DNA-dependent protein kinase catalytic subunit OS=Homo sapiens OX=9606 GN=PRKDC PE=1 SV=3	12983	473749	663	475	246	192	62	9642	1	1	1	499.605	1495.79	3	1495.79	-0.0007	0	38.06	0.00016	R	NCISTVVHQGLIR	I					Elution from: 43.2815 to 43.2815 RT Apex: 43.29 FinneganScanNumber: 13491
1	1	PRKDC_HUMAN	DNA-dependent protein kinase catalytic subunit OS=Homo sapiens OX=9606 GN=PRKDC PE=1 SV=3	12983	473749	663	475	246	192	62	9643	1	1	1	748.904	1495.79	2	1495.79	0.0003	0	45.58	2.8e-05	R	NCISTVVHQGLIR	I					Elution from: 45.7355 to 45.7355 RT Apex: 45.85 FinneganScanNumber: 14672
1	1	PRKDC_HUMAN	DNA-dependent protein kinase catalytic subunit OS=Homo sapiens OX=9606 GN=PRKDC PE=1 SV=3	12983	473749	663	475	246	192	62	9645	1	1	1	499.605	1495.79	3	1495.79	0.0011	0	31.24	0.00075	R	NCISTVVHQGLIR	I					Elution from: 46.4597 to 46.4597 RT Apex: 45.85 FinneganScanNumber: 15010
1	1	PRKDC_HUMAN	DNA-dependent protein kinase catalytic subunit OS=Homo sapiens OX=9606 GN=PRKDC PE=1 SV=3	12983	473749	663	475	246	192	62	9646	1	1	1	748.905	1495.79	2	1495.79	0.0019	0	23.61	0.0044	R	NCISTVVHQGLIR	I					Elution from: 46.5429 to 46.5429 RT Apex: 45.85 FinneganScanNumber: 15048
1	1	PRKDC_HUMAN	DNA-dependent protein kinase catalytic subunit OS=Homo sapiens OX=9606 GN=PRKDC PE=1 SV=3	12983	473749	663	475	246	192	62	9662	1	1	1	749.395	1496.78	2	1496.78	-0.0017	0	42.38	5.8e-05	R	NCISTVVHQGLIR	I	Deamidated (NQ)	0.1000000000000.0			Elution from: 57.1721 to 57.1721 RT Apex: 57.26 FinneganScanNumber: 20140
1	1	PRKDC_HUMAN	DNA-dependent protein kinase catalytic subunit OS=Homo sapiens OX=9606 GN=PRKDC PE=1 SV=3	12983	473749	663	475	246	192	62	9663	1	1	1	499.933	1496.78	3	1496.78	-0.0001	0	34.26	0.00038	R	NCISTVVHQGLIR	I	Deamidated (NQ)	0.1000000000000.0			Elution from: 57.1219 to 57.1219 RT Apex: 57.25 FinneganScanNumber: 20114
1	1	PRKDC_HUMAN	DNA-dependent protein kinase catalytic subunit OS=Homo sapiens OX=9606 GN=PRKDC PE=1 SV=3	12983	473749	663	475	246	192	62	9664	1	1	1	749.396	1496.78	2	1496.78	0.0009	0	33.64	0.00043	R	NCISTVVHQGLIR	I	Deamidated (NQ)	0.1000000000000.0			Elution from: 53.6946 to 53.6946 RT Apex: 53.72 FinneganScanNumber: 18441
1	1	PRKDC_HUMAN	DNA-dependent protein kinase catalytic subunit OS=Homo sapiens OX=9606 GN=PRKDC PE=1 SV=3	12983	473749	663	475	246	192	62	9665	1	1	1	499.933	1496.78	3	1496.78	0.0014	0	19.55	0.011	R	NCISTVVHQGLIR	I	Deamidated (NQ)	0.1000000000000.0			Elution from: 53.6403 to 53.6403 RT Apex: 53.70 FinneganScanNumber: 18419
1	1	PRKDC_HUMAN	DNA-dependent protein kinase catalytic subunit OS=Homo sapiens OX=9606 GN=PRKDC PE=1 SV=3	12983	473749	663	475	246	192	62	9752	1	1	1	752.336	1502.66	2	1502.65	0.0049	0	33.21	0.00048	K	QDWVDGEPTEAEK	D					Elution from: 39.9786 to 39.9786 RT Apex: 40.18 FinneganScanNumber: 12079
1	1	PRKDC_HUMAN	DNA-dependent protein kinase catalytic subunit OS=Homo sapiens OX=9606 GN=PRKDC PE=1 SV=3	12983	473749	663	475	246	192	62	9823	1	1	1	503.246	1506.72	3	1506.72	-0.0003	1	13.35	0.046	R	APPCEYKDWLTK	M					Elution from: 45.5540 to 45.5540 RT Apex: 45.70 FinneganScanNumber: 14591
1	1	PRKDC_HUMAN	DNA-dependent protein kinase catalytic subunit OS=Homo sapiens OX=9606 GN=PRKDC PE=1 SV=3	12983	473749	663	475	246	192	62	9952	1	1	1	506.601	1516.78	3	1516.78	-0.0007	0	41.27	7.5e-05	K	NILEESLCELVAK	Q					Elution from: 83.9929 to 83.9929 RT Apex: 84.09 FinneganScanNumber: 31931
1	1	PRKDC_HUMAN	DNA-dependent protein kinase catalytic subunit OS=Homo sapiens OX=9606 GN=PRKDC PE=1 SV=3	12983	473749	663	475	246	192	62	9953	1	1	1	759.397	1516.78	2	1516.78	-0.0006	0	39.17	0.00012	K	NILEESLCELVAK	Q					Elution from: 83.9029 to 83.9029 RT Apex: 84.09 FinneganScanNumber: 31898
1	1	PRKDC_HUMAN	DNA-dependent protein kinase catalytic subunit OS=Homo sapiens OX=9606 GN=PRKDC PE=1 SV=3	12983	473749	663	475	246	192	62	9954	1	1	1	759.398	1516.78	2	1516.78	0.0016	0	32.64	0.00054	K	NILEESLCELVAK	Q					Elution from: 84.8711 to 84.8711 RT Apex: 84.09 FinneganScanNumber: 32278
1	1	PRKDC_HUMAN	DNA-dependent protein kinase catalytic subunit OS=Homo sapiens OX=9606 GN=PRKDC PE=1 SV=3	12983	473749	663	475	246	192	62	9986	1	1	1	760.931	1519.85	2	1519.85	0.0008	0	36.7	0.00021	K	HSSLITPLQAVAQR	D					Elution from: 52.0857 to 52.0857 RT Apex: 52.23 FinneganScanNumber: 17774
1	1	PRKDC_HUMAN	DNA-dependent protein kinase catalytic subunit OS=Homo sapiens OX=9606 GN=PRKDC PE=1 SV=3	12983	473749	663	475	246	192	62	9987	1	1	1	507.623	1519.85	3	1519.85	0.0013	0	48.22	1.5e-05	K	HSSLITPLQAVAQR	D					Elution from: 52.1468 to 52.1468 RT Apex: 52.23 FinneganScanNumber: 17802
1	1	PRKDC_HUMAN	DNA-dependent protein kinase catalytic subunit OS=Homo sapiens OX=9606 GN=PRKDC PE=1 SV=3	12983	473749	663	475	246	192	62	10066	1	1	1	764.34	1526.66	2	1526.67	-0.0023	0	52.96	5.1e-06	K	QMFLTQTDTGDDR	V					Elution from: 46.9371 to 46.9371 RT Apex: 47.06 FinneganScanNumber: 15236
1	1	PRKDC_HUMAN	DNA-dependent protein kinase catalytic subunit OS=Homo sapiens OX=9606 GN=PRKDC PE=1 SV=3	12983	473749	663	475	246	192	62	10073	1	1	1	764.379	1526.74	2	1526.74	-0.0013	0	44.45	3.6e-05	K	DVDFMYVELIQR	C					Elution from: 92.5624 to 92.5624 RT Apex: 92.53 FinneganScanNumber: 34927
1	1	PRKDC_HUMAN	DNA-dependent protein kinase catalytic subunit OS=Homo sapiens OX=9606 GN=PRKDC PE=1 SV=3	12983	473749	663	475	246	192	62	10074	1	1	1	764.379	1526.74	2	1526.74	-0.0001	0	39.64	0.00011	K	DVDFMYVELIQR	C					Elution from: 91.8000 to 91.8000 RT Apex: 91.24 FinneganScanNumber: 34683
1	1	PRKDC_HUMAN	DNA-dependent protein kinase catalytic subunit OS=Homo sapiens OX=9606 GN=PRKDC PE=1 SV=3	12983	473749	663	475	246	192	62	10075	1	1	1	764.379	1526.74	2	1526.74	0.0003	0	39.23	0.00012	K	DVDFMYVELIQR	C					Elution from: 91.0391 to 91.0391 RT Apex: 91.24 FinneganScanNumber: 34430
1	1	PRKDC_HUMAN	DNA-dependent protein kinase catalytic subunit OS=Homo sapiens OX=9606 GN=PRKDC PE=1 SV=3	12983	473749	663	475	246	192	62	10076	1	1	1	764.379	1526.74	2	1526.74	0.0003	0	43.66	4.3e-05	K	DVDFMYVELIQR	C					Elution from: 99.7533 to 99.7533 RT Apex: 99.76 FinneganScanNumber: 37005
1	1	PRKDC_HUMAN	DNA-dependent protein kinase catalytic subunit OS=Homo sapiens OX=9606 GN=PRKDC PE=1 SV=3	12983	473749	663	475	246	192	62	10077	1	1	1	509.922	1526.74	3	1526.74	0.0009	0	27.9	0.0016	K	DVDFMYVELIQR	C					Elution from: 91.0695 to 91.0695 RT Apex: 91.12 FinneganScanNumber: 34440
1	1	PRKDC_HUMAN	DNA-dependent protein kinase catalytic subunit OS=Homo sapiens OX=9606 GN=PRKDC PE=1 SV=3	12983	473749	663	475	246	192	62	10079	1	1	1	764.381	1526.75	2	1526.74	0.0031	0	17.9	0.016	K	DVDFMYVELIQR	C					Elution from: 100.9299 to 100.9299 RT Apex: 100.95 FinneganScanNumber: 37651
1	1	PRKDC_HUMAN	DNA-dependent protein kinase catalytic subunit OS=Homo sapiens OX=9606 GN=PRKDC PE=1 SV=3	12983	473749	663	475	246	192	62	10269	1	1	1	772.336	1542.66	2	1542.66	-0.0048	0	48.87	1.3e-05	K	QMFLTQTDTGDDR	V	Oxidation (M)	0.0200000000000.0			Elution from: 37.5754 to 37.5754 RT Apex: 37.83 FinneganScanNumber: 11106
1	1	PRKDC_HUMAN	DNA-dependent protein kinase catalytic subunit OS=Homo sapiens OX=9606 GN=PRKDC PE=1 SV=3	12983	473749	663	475	246	192	62	10284	1	1	1	772.377	1542.74	2	1542.74	0.0004	0	32.91	0.00051	K	DVDFMYVELIQR	C	Oxidation (M)	0.000020000000.0			Elution from: 80.5163 to 80.5163 RT Apex: 80.60 FinneganScanNumber: 30463
1	1	PRKDC_HUMAN	DNA-dependent protein kinase catalytic subunit OS=Homo sapiens OX=9606 GN=PRKDC PE=1 SV=3	12983	473749	663	475	246	192	62	10465	1	1	1	779.915	1557.82	2	1557.82	0.0012	1	61.95	6.4e-07	K	KGGSWIQEINVAEK	N					Elution from: 49.9215 to 49.9215 RT Apex: 50.05 FinneganScanNumber: 16727
1	1	PRKDC_HUMAN	DNA-dependent protein kinase catalytic subunit OS=Homo sapiens OX=9606 GN=PRKDC PE=1 SV=3	12983	473749	663	475	246	192	62	10466	1	1	1	520.279	1557.82	3	1557.82	0.0016	1	30.7	0.00085	K	KGGSWIQEINVAEK	N					Elution from: 49.9241 to 49.9241 RT Apex: 50.05 FinneganScanNumber: 16729
1	1	PRKDC_HUMAN	DNA-dependent protein kinase catalytic subunit OS=Homo sapiens OX=9606 GN=PRKDC PE=1 SV=3	12983	473749	663	475	246	192	62	10622	1	1	1	524.949	1571.83	3	1571.83	-0.0003	1	9.39	0.12	R	NVDSNNKELSIAIR	G					Elution from: 40.7372 to 40.7372 RT Apex: 40.77 FinneganScanNumber: 12356
1	1	PRKDC_HUMAN	DNA-dependent protein kinase catalytic subunit OS=Homo sapiens OX=9606 GN=PRKDC PE=1 SV=3	12983	473749	663	475	246	192	62	10636	1	1	1	525.278	1572.81	3	1572.81	0.0012	1	12.05	0.062	R	NVDSNNKELSIAIR	G	Deamidated (NQ)	0.00000100000000.0			Elution from: 45.9608 to 45.9608 RT Apex: 45.94 FinneganScanNumber: 14776
1	1	PRKDC_HUMAN	DNA-dependent protein kinase catalytic subunit OS=Homo sapiens OX=9606 GN=PRKDC PE=1 SV=3	12983	473749	663	475	246	192	62	10649	1	1	1	787.904	1573.79	2	1573.79	-0.0019	0	43.84	4.1e-05	K	NLSSNEAISLEEIR	I					Elution from: 59.6464 to 59.6464 RT Apex: 58.66 FinneganScanNumber: 21311
1	1	PRKDC_HUMAN	DNA-dependent protein kinase catalytic subunit OS=Homo sapiens OX=9606 GN=PRKDC PE=1 SV=3	12983	473749	663	475	246	192	62	10650	1	1	1	787.904	1573.79	2	1573.79	-0.0019	0	55.45	2.9e-06	K	NLSSNEAISLEEIR	I					Elution from: 58.0834 to 58.0834 RT Apex: 58.23 FinneganScanNumber: 20562
1	1	PRKDC_HUMAN	DNA-dependent protein kinase catalytic subunit OS=Homo sapiens OX=9606 GN=PRKDC PE=1 SV=3	12983	473749	663	475	246	192	62	10651	1	1	1	787.904	1573.79	2	1573.79	-0.0007	0	81.09	7.8e-09	K	NLSSNEAISLEEIR	I					Elution from: 58.8414 to 58.8414 RT Apex: 58.23 FinneganScanNumber: 20934
1	1	PRKDC_HUMAN	DNA-dependent protein kinase catalytic subunit OS=Homo sapiens OX=9606 GN=PRKDC PE=1 SV=3	12983	473749	663	475	246	192	62	10652	1	1	1	525.605	1573.79	3	1573.79	-0.0003	0	45.86	2.6e-05	K	NLSSNEAISLEEIR	I					Elution from: 58.1301 to 58.1301 RT Apex: 58.24 FinneganScanNumber: 20588
1	1	PRKDC_HUMAN	DNA-dependent protein kinase catalytic subunit OS=Homo sapiens OX=9606 GN=PRKDC PE=1 SV=3	12983	473749	663	475	246	192	62	10664	1	1	1	788.396	1574.78	2	1574.78	-0.0007	0	40.62	8.7e-05	K	NLSSNEAISLEEIR	I	Deamidated (NQ)	0.00001000000000.0			Elution from: 61.6746 to 61.6746 RT Apex: 61.81 FinneganScanNumber: 22230
1	1	PRKDC_HUMAN	DNA-dependent protein kinase catalytic subunit OS=Homo sapiens OX=9606 GN=PRKDC PE=1 SV=3	12983	473749	663	475	246	192	62	10818	1	1	1	794.458	1586.9	2	1586.9	-0.0023	0	30.05	0.00099	K	EVYAAAAEVLGLILR	Y					Elution from: 101.1604 to 101.1604 RT Apex: 100.21 FinneganScanNumber: 37740
1	1	PRKDC_HUMAN	DNA-dependent protein kinase catalytic subunit OS=Homo sapiens OX=9606 GN=PRKDC PE=1 SV=3	12983	473749	663	475	246	192	62	10819	1	1	1	794.459	1586.9	2	1586.9	0.0003	0	56.15	2.4e-06	K	EVYAAAAEVLGLILR	Y					Elution from: 99.9479 to 99.9479 RT Apex: 100.06 FinneganScanNumber: 37103
1	1	PRKDC_HUMAN	DNA-dependent protein kinase catalytic subunit OS=Homo sapiens OX=9606 GN=PRKDC PE=1 SV=3	12983	473749	663	475	246	192	62	10820	1	1	1	529.976	1586.91	3	1586.9	0.0027	0	75.21	3e-08	K	EVYAAAAEVLGLILR	Y					Elution from: 99.9578 to 99.9578 RT Apex: 99.94 FinneganScanNumber: 37110
1	1	PRKDC_HUMAN	DNA-dependent protein kinase catalytic subunit OS=Homo sapiens OX=9606 GN=PRKDC PE=1 SV=3	12983	473749	663	475	246	192	62	11018	1	1	1	802.381	1602.75	2	1602.75	-0.001	0	61.01	7.9e-07	K	CLMDQATDPNILGR	T					Elution from: 61.4416 to 61.4416 RT Apex: 61.53 FinneganScanNumber: 22139
1	1	PRKDC_HUMAN	DNA-dependent protein kinase catalytic subunit OS=Homo sapiens OX=9606 GN=PRKDC PE=1 SV=3	12983	473749	663	475	246	192	62	11087	1	1	1	536.929	1607.77	3	1607.77	-0.0002	0	26.26	0.0024	R	YNFPVEVEVPMER	K					Elution from: 74.8671 to 74.8671 RT Apex: 74.91 FinneganScanNumber: 28041
1	1	PRKDC_HUMAN	DNA-dependent protein kinase catalytic subunit OS=Homo sapiens OX=9606 GN=PRKDC PE=1 SV=3	12983	473749	663	475	246	192	62	11088	1	1	1	804.89	1607.77	2	1607.77	0.0011	0	60.81	8.3e-07	R	YNFPVEVEVPMER	K					Elution from: 74.7271 to 74.7271 RT Apex: 74.93 FinneganScanNumber: 27978
1	1	PRKDC_HUMAN	DNA-dependent protein kinase catalytic subunit OS=Homo sapiens OX=9606 GN=PRKDC PE=1 SV=3	12983	473749	663	475	246	192	62	11172	1	1	1	808.938	1615.86	2	1615.86	-0.0023	0	54.19	3.8e-06	R	GFPPSASLCLLDLVK	W					Elution from: 94.7301 to 94.7301 RT Apex: 94.74 FinneganScanNumber: 35613
1	1	PRKDC_HUMAN	DNA-dependent protein kinase catalytic subunit OS=Homo sapiens OX=9606 GN=PRKDC PE=1 SV=3	12983	473749	663	475	246	192	62	11173	1	1	1	808.939	1615.86	2	1615.86	-0.0015	0	53.86	4.1e-06	R	GFPPSASLCLLDLVK	W					Elution from: 93.2132 to 93.2132 RT Apex: 93.36 FinneganScanNumber: 35120
1	1	PRKDC_HUMAN	DNA-dependent protein kinase catalytic subunit OS=Homo sapiens OX=9606 GN=PRKDC PE=1 SV=3	12983	473749	663	475	246	192	62	11174	1	1	1	808.939	1615.86	2	1615.86	-0.0005	0	54.86	3.3e-06	R	GFPPSASLCLLDLVK	W					Elution from: 93.9711 to 93.9711 RT Apex: 93.36 FinneganScanNumber: 35363
1	1	PRKDC_HUMAN	DNA-dependent protein kinase catalytic subunit OS=Homo sapiens OX=9606 GN=PRKDC PE=1 SV=3	12983	473749	663	475	246	192	62	11175	1	1	1	808.939	1615.86	2	1615.86	-0.0001	0	53.68	4.3e-06	R	GFPPSASLCLLDLVK	W					Elution from: 92.4556 to 92.4556 RT Apex: 93.36 FinneganScanNumber: 34895
1	1	PRKDC_HUMAN	DNA-dependent protein kinase catalytic subunit OS=Homo sapiens OX=9606 GN=PRKDC PE=1 SV=3	12983	473749	663	475	246	192	62	11176	1	1	1	539.629	1615.87	3	1615.86	0.0008	0	29.22	0.0012	R	GFPPSASLCLLDLVK	W					Elution from: 94.0891 to 94.0891 RT Apex: 94.12 FinneganScanNumber: 35410
1	1	PRKDC_HUMAN	DNA-dependent protein kinase catalytic subunit OS=Homo sapiens OX=9606 GN=PRKDC PE=1 SV=3	12983	473749	663	475	246	192	62	11177	1	1	1	539.629	1615.87	3	1615.86	0.0008	0	53.25	4.7e-06	R	GFPPSASLCLLDLVK	W					Elution from: 93.3227 to 93.3227 RT Apex: 93.23 FinneganScanNumber: 35157
1	1	PRKDC_HUMAN	DNA-dependent protein kinase catalytic subunit OS=Homo sapiens OX=9606 GN=PRKDC PE=1 SV=3	12983	473749	663	475	246	192	62	11179	1	1	1	539.63	1615.87	3	1615.86	0.0023	0	34.9	0.00032	R	GFPPSASLCLLDLVK	W					Elution from: 92.5672 to 92.5672 RT Apex: 92.54 FinneganScanNumber: 34930
1	1	PRKDC_HUMAN	DNA-dependent protein kinase catalytic subunit OS=Homo sapiens OX=9606 GN=PRKDC PE=1 SV=3	12983	473749	663	475	246	192	62	11188	1	1	1	809.388	1616.76	2	1616.77	-0.0037	0	12.5	0.056	K	DFSAFINLVEFCR	E					Elution from: 101.1152 to 101.1152 RT Apex: 101.16 FinneganScanNumber: 37724
1	1	PRKDC_HUMAN	DNA-dependent protein kinase catalytic subunit OS=Homo sapiens OX=9606 GN=PRKDC PE=1 SV=3	12983	473749	663	475	246	192	62	11190	1	1	1	809.39	1616.76	2	1616.77	-0.0009	0	46.58	2.2e-05	K	DFSAFINLVEFCR	E					Elution from: 99.9241 to 99.9241 RT Apex: 99.91 FinneganScanNumber: 37089
1	1	PRKDC_HUMAN	DNA-dependent protein kinase catalytic subunit OS=Homo sapiens OX=9606 GN=PRKDC PE=1 SV=3	12983	473749	663	475	246	192	62	11200	1	1	1	810.381	1618.75	2	1618.74	0.0027	0	43.1	4.9e-05	K	CLMDQATDPNILGR	T	Oxidation (M)	0.00200000000000.0			Elution from: 50.3604 to 50.3604 RT Apex: 50.30 FinneganScanNumber: 16937
1	1	PRKDC_HUMAN	DNA-dependent protein kinase catalytic subunit OS=Homo sapiens OX=9606 GN=PRKDC PE=1 SV=3	12983	473749	663	475	246	192	62	11205	1	1	1	810.408	1618.8	2	1618.8	-0.0011	0	37.86	0.00016	K	FYQGFLFSEKPEK	N					Elution from: 57.0260 to 57.0260 RT Apex: 57.15 FinneganScanNumber: 20064
1	1	PRKDC_HUMAN	DNA-dependent protein kinase catalytic subunit OS=Homo sapiens OX=9606 GN=PRKDC PE=1 SV=3	12983	473749	663	475	246	192	62	11206	1	1	1	540.609	1618.81	3	1618.8	0.002	0	26.04	0.0025	K	FYQGFLFSEKPEK	N					Elution from: 56.9994 to 56.9994 RT Apex: 57.16 FinneganScanNumber: 20050
1	1	PRKDC_HUMAN	DNA-dependent protein kinase catalytic subunit OS=Homo sapiens OX=9606 GN=PRKDC PE=1 SV=3	12983	473749	663	475	246	192	62	11222	1	1	1	540.947	1619.82	3	1619.82	0.0013	0	24.71	0.0034	K	ETGLMYSIMVHALR	A					Elution from: 75.5344 to 75.5344 RT Apex: 75.55 FinneganScanNumber: 28307
1	1	PRKDC_HUMAN	DNA-dependent protein kinase catalytic subunit OS=Homo sapiens OX=9606 GN=PRKDC PE=1 SV=3	12983	473749	663	475	246	192	62	11280	1	1	1	812.887	1623.76	2	1623.76	-0.0016	0	20.93	0.0081	R	YNFPVEVEVPMER	K	Oxidation (M)	0.0000000000200.0			Elution from: 67.7866 to 67.7866 RT Apex: 67.85 FinneganScanNumber: 25050
1	1	PRKDC_HUMAN	DNA-dependent protein kinase catalytic subunit OS=Homo sapiens OX=9606 GN=PRKDC PE=1 SV=3	12983	473749	663	475	246	192	62	11325	1	1	1	814.966	1627.92	2	1627.92	-0.0004	0	77.23	1.9e-08	R	LGLIEWLENTVTLK	D					Elution from: 99.9341 to 99.9341 RT Apex: 100.15 FinneganScanNumber: 37096
1	1	PRKDC_HUMAN	DNA-dependent protein kinase catalytic subunit OS=Homo sapiens OX=9606 GN=PRKDC PE=1 SV=3	12983	473749	663	475	246	192	62	11326	1	1	1	814.966	1627.92	2	1627.92	-0.0002	0	5.72	0.27	R	LGLIEWLENTVTLK	D					Elution from: 100.9172 to 100.9172 RT Apex: 100.15 FinneganScanNumber: 37645
1	1	PRKDC_HUMAN	DNA-dependent protein kinase catalytic subunit OS=Homo sapiens OX=9606 GN=PRKDC PE=1 SV=3	12983	473749	663	475	246	192	62	11342	1	1	1	815.458	1628.9	2	1628.9	-0.0006	0	42.18	6e-05	R	LGLIEWLENTVTLK	D	Deamidated (NQ)	0.00000000100000.0			Elution from: 97.1978 to 97.1978 RT Apex: 97.33 FinneganScanNumber: 36369
1	1	PRKDC_HUMAN	DNA-dependent protein kinase catalytic subunit OS=Homo sapiens OX=9606 GN=PRKDC PE=1 SV=3	12983	473749	663	475	246	192	62	11343	1	1	1	543.975	1628.9	3	1628.9	0.0001	0	34.51	0.00035	R	LGLIEWLENTVTLK	D	Deamidated (NQ)	0.00000000100000.0			Elution from: 97.2723 to 97.2723 RT Apex: 97.32 FinneganScanNumber: 36393
1	1	PRKDC_HUMAN	DNA-dependent protein kinase catalytic subunit OS=Homo sapiens OX=9606 GN=PRKDC PE=1 SV=3	12983	473749	663	475	246	192	62	11353	1	1	1	544.596	1630.76	3	1630.77	-0.0039	0	18.44	0.014	R	AQEPESGLSEETQVK	C					Elution from: 33.4930 to 33.4930 RT Apex: 33.73 FinneganScanNumber: 9411
1	1	PRKDC_HUMAN	DNA-dependent protein kinase catalytic subunit OS=Homo sapiens OX=9606 GN=PRKDC PE=1 SV=3	12983	473749	663	475	246	192	62	11354	1	1	1	816.39	1630.77	2	1630.77	-0.0035	0	68.79	1.3e-07	R	AQEPESGLSEETQVK	C					Elution from: 34.1174 to 34.1174 RT Apex: 33.78 FinneganScanNumber: 9672
1	1	PRKDC_HUMAN	DNA-dependent protein kinase catalytic subunit OS=Homo sapiens OX=9606 GN=PRKDC PE=1 SV=3	12983	473749	663	475	246	192	62	11355	1	1	1	816.39	1630.77	2	1630.77	-0.0033	0	42.25	6e-05	R	AQEPESGLSEETQVK	C					Elution from: 33.3598 to 33.3598 RT Apex: 33.78 FinneganScanNumber: 9357
1	1	PRKDC_HUMAN	DNA-dependent protein kinase catalytic subunit OS=Homo sapiens OX=9606 GN=PRKDC PE=1 SV=3	12983	473749	663	475	246	192	62	11356	1	1	1	544.597	1630.77	3	1630.77	0.0012	0	33.99	0.0004	R	AQEPESGLSEETQVK	C					Elution from: 34.2523 to 34.2523 RT Apex: 33.73 FinneganScanNumber: 9723
1	1	PRKDC_HUMAN	DNA-dependent protein kinase catalytic subunit OS=Homo sapiens OX=9606 GN=PRKDC PE=1 SV=3	12983	473749	663	475	246	192	62	11357	1	1	1	816.393	1630.77	2	1630.77	0.0033	0	53.56	4.4e-06	R	AQEPESGLSEETQVK	C					Elution from: 34.8904 to 34.8904 RT Apex: 33.92 FinneganScanNumber: 9995
1	1	PRKDC_HUMAN	DNA-dependent protein kinase catalytic subunit OS=Homo sapiens OX=9606 GN=PRKDC PE=1 SV=3	12983	473749	663	475	246	192	62	11359	1	1	1	544.613	1630.82	3	1630.82	0.0009	2	1.13	0.77	R	KQNNFSLAMKLLK	E	Deamidated (NQ); Oxidation (M); Phospho (ST)	0.0010030020000.0			Elution from: 62.6787 to 62.6787 RT Apex: 62.67 FinneganScanNumber: 22699
1	1	PRKDC_HUMAN	DNA-dependent protein kinase catalytic subunit OS=Homo sapiens OX=9606 GN=PRKDC PE=1 SV=3	12983	473749	663	475	246	192	62	11419	1	1	1	818.905	1635.8	2	1635.8	0.0005	1	63.74	4.2e-07	R	RILELSGSSSEDSEK	V					Elution from: 30.7226 to 30.7226 RT Apex: 30.85 FinneganScanNumber: 8300
1	1	PRKDC_HUMAN	DNA-dependent protein kinase catalytic subunit OS=Homo sapiens OX=9606 GN=PRKDC PE=1 SV=3	12983	473749	663	475	246	192	62	11420	1	1	1	546.273	1635.8	3	1635.8	0.0006	1	29.54	0.0011	R	RILELSGSSSEDSEK	V					Elution from: 30.6607 to 30.6607 RT Apex: 30.85 FinneganScanNumber: 8268
1	1	PRKDC_HUMAN	DNA-dependent protein kinase catalytic subunit OS=Homo sapiens OX=9606 GN=PRKDC PE=1 SV=3	12983	473749	663	475	246	192	62	11421	1	1	1	818.915	1635.82	2	1635.82	-0.0014	0	73.33	4.6e-08	R	SDPGLLTNTMDVFVK	E					Elution from: 81.7693 to 81.7693 RT Apex: 81.92 FinneganScanNumber: 30992
1	1	PRKDC_HUMAN	DNA-dependent protein kinase catalytic subunit OS=Homo sapiens OX=9606 GN=PRKDC PE=1 SV=3	12983	473749	663	475	246	192	62	11424	1	1	1	818.933	1635.85	2	1635.85	-0.0025	0	75.21	3e-08	K	LSDFNDITNMLLLK	M					Elution from: 95.8472 to 95.8472 RT Apex: 95.96 FinneganScanNumber: 35979
1	1	PRKDC_HUMAN	DNA-dependent protein kinase catalytic subunit OS=Homo sapiens OX=9606 GN=PRKDC PE=1 SV=3	12983	473749	663	475	246	192	62	11425	1	1	1	546.292	1635.86	3	1635.85	0.0012	0	49.19	1.2e-05	K	LSDFNDITNMLLLK	M					Elution from: 95.9286 to 95.9286 RT Apex: 95.96 FinneganScanNumber: 35999
1	1	PRKDC_HUMAN	DNA-dependent protein kinase catalytic subunit OS=Homo sapiens OX=9606 GN=PRKDC PE=1 SV=3	12983	473749	663	475	246	192	62	11432	1	1	1	819.41	1636.81	2	1636.8	0.0046	0	33.96	0.0004	R	SDPGLLTNTMDVFVK	E	Deamidated (NQ)	0.000000010000000.0			Elution from: 80.4812 to 80.4812 RT Apex: 80.68 FinneganScanNumber: 30452
1	1	PRKDC_HUMAN	DNA-dependent protein kinase catalytic subunit OS=Homo sapiens OX=9606 GN=PRKDC PE=1 SV=3	12983	473749	663	475	246	192	62	11578	1	1	1	549.299	1644.88	3	1644.88	-0.0001	1	44.34	3.7e-05	R	KNILEESLCELVAK	Q					Elution from: 73.2865 to 73.2865 RT Apex: 73.49 FinneganScanNumber: 27337
1	1	PRKDC_HUMAN	DNA-dependent protein kinase catalytic subunit OS=Homo sapiens OX=9606 GN=PRKDC PE=1 SV=3	12983	473749	663	475	246	192	62	11579	1	1	1	823.445	1644.88	2	1644.88	0.0006	1	69.19	1.2e-07	R	KNILEESLCELVAK	Q					Elution from: 73.3150 to 73.3150 RT Apex: 73.51 FinneganScanNumber: 27349
1	1	PRKDC_HUMAN	DNA-dependent protein kinase catalytic subunit OS=Homo sapiens OX=9606 GN=PRKDC PE=1 SV=3	12983	473749	663	475	246	192	62	11700	1	1	1	826.914	1651.81	2	1651.81	0.0017	0	49.21	1.2e-05	R	SDPGLLTNTMDVFVK	E	Oxidation (M)	0.000000000200000.0			Elution from: 66.5326 to 66.5326 RT Apex: 66.99 FinneganScanNumber: 24434
1	1	PRKDC_HUMAN	DNA-dependent protein kinase catalytic subunit OS=Homo sapiens OX=9606 GN=PRKDC PE=1 SV=3	12983	473749	663	475	246	192	62	11704	1	1	1	826.931	1651.85	2	1651.85	-0.0008	0	61.31	7.4e-07	K	LSDFNDITNMLLLK	M	Oxidation (M)	0.00000000020000.0			Elution from: 84.0748 to 84.0748 RT Apex: 84.11 FinneganScanNumber: 31960
1	1	PRKDC_HUMAN	DNA-dependent protein kinase catalytic subunit OS=Homo sapiens OX=9606 GN=PRKDC PE=1 SV=3	12983	473749	663	475	246	192	62	11705	1	1	1	826.932	1651.85	2	1651.85	-0.0004	0	66.54	2.2e-07	K	LSDFNDITNMLLLK	M	Oxidation (M)	0.00000000020000.0			Elution from: 83.2480 to 83.2480 RT Apex: 83.32 FinneganScanNumber: 31627
1	1	PRKDC_HUMAN	DNA-dependent protein kinase catalytic subunit OS=Homo sapiens OX=9606 GN=PRKDC PE=1 SV=3	12983	473749	663	475	246	192	62	11706	1	1	1	551.624	1651.85	3	1651.85	0.0005	0	15.78	0.026	K	LSDFNDITNMLLLK	M	Oxidation (M)	0.00000000020000.0			Elution from: 83.2614 to 83.2614 RT Apex: 83.33 FinneganScanNumber: 31634
1	1	PRKDC_HUMAN	DNA-dependent protein kinase catalytic subunit OS=Homo sapiens OX=9606 GN=PRKDC PE=1 SV=3	12983	473749	663	475	246	192	62	11916	1	1	1	834.415	1666.82	2	1666.82	-0.002	0	79.34	1.2e-08	K	MVSAVLNGMLDQSFR	E					Elution from: 78.7942 to 78.7942 RT Apex: 78.78 FinneganScanNumber: 29731
1	1	PRKDC_HUMAN	DNA-dependent protein kinase catalytic subunit OS=Homo sapiens OX=9606 GN=PRKDC PE=1 SV=3	12983	473749	663	475	246	192	62	11917	1	1	1	556.613	1666.82	3	1666.82	0.0001	0	40.65	8.6e-05	K	MVSAVLNGMLDQSFR	E					Elution from: 78.7210 to 78.7210 RT Apex: 78.85 FinneganScanNumber: 29704
1	1	PRKDC_HUMAN	DNA-dependent protein kinase catalytic subunit OS=Homo sapiens OX=9606 GN=PRKDC PE=1 SV=3	12983	473749	663	475	246	192	62	11934	1	1	1	556.94	1667.8	3	1667.8	-0.0029	0	27.98	0.0016	K	MVSAVLNGMLDQSFR	E	Deamidated (NQ)	0.000000100000000.0			Elution from: 82.7282 to 82.7282 RT Apex: 82.81 FinneganScanNumber: 31414
1	1	PRKDC_HUMAN	DNA-dependent protein kinase catalytic subunit OS=Homo sapiens OX=9606 GN=PRKDC PE=1 SV=3	12983	473749	663	475	246	192	62	11935	1	1	1	556.941	1667.8	3	1667.8	0.0004	0	39.01	0.00013	K	MVSAVLNGMLDQSFR	E	Deamidated (NQ)	0.000000100000000.0			Elution from: 76.3947 to 76.3947 RT Apex: 76.41 FinneganScanNumber: 28678
1	1	PRKDC_HUMAN	DNA-dependent protein kinase catalytic subunit OS=Homo sapiens OX=9606 GN=PRKDC PE=1 SV=3	12983	473749	663	475	246	192	62	11936	1	1	1	834.908	1667.8	2	1667.8	0.0007	0	54.32	3.7e-06	K	MVSAVLNGMLDQSFR	E	Deamidated (NQ)	0.000000100000000.0			Elution from: 76.3117 to 76.3117 RT Apex: 76.43 FinneganScanNumber: 28640
1	1	PRKDC_HUMAN	DNA-dependent protein kinase catalytic subunit OS=Homo sapiens OX=9606 GN=PRKDC PE=1 SV=3	12983	473749	663	475	246	192	62	12069	1	1	1	560.31	1677.91	3	1677.91	0.0001	0	34.2	0.00038	K	LVINTEEVFRPYAK	H					Elution from: 59.9379 to 59.9379 RT Apex: 60.08 FinneganScanNumber: 21448
1	1	PRKDC_HUMAN	DNA-dependent protein kinase catalytic subunit OS=Homo sapiens OX=9606 GN=PRKDC PE=1 SV=3	12983	473749	663	475	246	192	62	12070	1	1	1	839.962	1677.91	2	1677.91	0.0013	0	44.05	3.9e-05	K	LVINTEEVFRPYAK	H					Elution from: 60.0002 to 60.0002 RT Apex: 60.08 FinneganScanNumber: 21479
1	1	PRKDC_HUMAN	DNA-dependent protein kinase catalytic subunit OS=Homo sapiens OX=9606 GN=PRKDC PE=1 SV=3	12983	473749	663	475	246	192	62	12288	1	1	1	848.464	1694.91	2	1694.91	0.0003	0	59.47	1.1e-06	R	EFFSTIVVDAIDVLK	S					Elution from: 99.9450 to 99.9450 RT Apex: 100.06 FinneganScanNumber: 37101
1	1	PRKDC_HUMAN	DNA-dependent protein kinase catalytic subunit OS=Homo sapiens OX=9606 GN=PRKDC PE=1 SV=3	12983	473749	663	475	246	192	62	12359	1	1	1	852.481	1702.95	2	1702.95	-0.0012	0	16.81	0.021	R	EMKPVIFLDVFLPR	V					Elution from: 94.9578 to 94.9578 RT Apex: 95.07 FinneganScanNumber: 35691
1	1	PRKDC_HUMAN	DNA-dependent protein kinase catalytic subunit OS=Homo sapiens OX=9606 GN=PRKDC PE=1 SV=3	12983	473749	663	475	246	192	62	12360	1	1	1	426.745	1702.95	4	1702.95	0.0017	0	16.51	0.022	R	EMKPVIFLDVFLPR	V					Elution from: 95.0831 to 95.0831 RT Apex: 95.07 FinneganScanNumber: 35732
1	1	PRKDC_HUMAN	DNA-dependent protein kinase catalytic subunit OS=Homo sapiens OX=9606 GN=PRKDC PE=1 SV=3	12983	473749	663	475	246	192	62	12361	1	1	1	568.657	1702.95	3	1702.95	0.0023	0	34.01	0.0004	R	EMKPVIFLDVFLPR	V					Elution from: 94.9095 to 94.9095 RT Apex: 95.11 FinneganScanNumber: 35675
1	1	PRKDC_HUMAN	DNA-dependent protein kinase catalytic subunit OS=Homo sapiens OX=9606 GN=PRKDC PE=1 SV=3	12983	473749	663	475	246	192	62	12418	1	1	1	854.432	1706.85	2	1706.85	-0.0004	0	44.29	3.7e-05	K	LQYFMEQFYGIIR	N					Elution from: 90.8871 to 90.8871 RT Apex: 91.00 FinneganScanNumber: 34374
1	1	PRKDC_HUMAN	DNA-dependent protein kinase catalytic subunit OS=Homo sapiens OX=9606 GN=PRKDC PE=1 SV=3	12983	473749	663	475	246	192	62	12419	1	1	1	569.957	1706.85	3	1706.85	0.001	0	31.01	0.00079	K	LQYFMEQFYGIIR	N					Elution from: 90.8948 to 90.8948 RT Apex: 90.89 FinneganScanNumber: 34377
1	1	PRKDC_HUMAN	DNA-dependent protein kinase catalytic subunit OS=Homo sapiens OX=9606 GN=PRKDC PE=1 SV=3	12983	473749	663	475	246	192	62	12420	1	1	1	569.957	1706.85	3	1706.85	0.0016	0	24.58	0.0035	K	LQYFMEQFYGIIR	N					Elution from: 99.6575 to 99.6575 RT Apex: 99.65 FinneganScanNumber: 36972
1	1	PRKDC_HUMAN	DNA-dependent protein kinase catalytic subunit OS=Homo sapiens OX=9606 GN=PRKDC PE=1 SV=3	12983	473749	663	475	246	192	62	12421	1	1	1	854.433	1706.85	2	1706.85	0.0018	0	43.93	4e-05	K	LQYFMEQFYGIIR	N					Elution from: 99.6561 to 99.6561 RT Apex: 99.65 FinneganScanNumber: 36971
1	1	PRKDC_HUMAN	DNA-dependent protein kinase catalytic subunit OS=Homo sapiens OX=9606 GN=PRKDC PE=1 SV=3	12983	473749	663	475	246	192	62	12422	1	1	1	854.433	1706.85	2	1706.85	0.0022	0	42.37	5.8e-05	K	LQYFMEQFYGIIR	N					Elution from: 91.8279 to 91.8279 RT Apex: 91.84 FinneganScanNumber: 34691
1	1	PRKDC_HUMAN	DNA-dependent protein kinase catalytic subunit OS=Homo sapiens OX=9606 GN=PRKDC PE=1 SV=3	12983	473749	663	475	246	192	62	12489	1	1	1	571.928	1712.76	3	1712.76	-0.0001	0	41.44	7.2e-05	R	DDWLVSWVQSYCR	L					Elution from: 97.7513 to 97.7513 RT Apex: 97.83 FinneganScanNumber: 36527
1	1	PRKDC_HUMAN	DNA-dependent protein kinase catalytic subunit OS=Homo sapiens OX=9606 GN=PRKDC PE=1 SV=3	12983	473749	663	475	246	192	62	12490	1	1	1	857.389	1712.76	2	1712.76	0.0015	0	34.31	0.00037	R	DDWLVSWVQSYCR	L					Elution from: 97.6842 to 97.6842 RT Apex: 97.84 FinneganScanNumber: 36510
1	1	PRKDC_HUMAN	DNA-dependent protein kinase catalytic subunit OS=Homo sapiens OX=9606 GN=PRKDC PE=1 SV=3	12983	473749	663	475	246	192	62	12571	1	1	1	573.988	1718.94	3	1718.94	-0.0002	0	33.16	0.00048	R	EMKPVIFLDVFLPR	V	Oxidation (M)	0.02000000000000.0			Elution from: 90.0299 to 90.0299 RT Apex: 89.78 FinneganScanNumber: 34075
1	1	PRKDC_HUMAN	DNA-dependent protein kinase catalytic subunit OS=Homo sapiens OX=9606 GN=PRKDC PE=1 SV=3	12983	473749	663	475	246	192	62	12572	1	1	1	573.989	1718.94	3	1718.94	0.001	0	25.75	0.0027	R	EMKPVIFLDVFLPR	V	Oxidation (M)	0.02000000000000.0			Elution from: 89.1159 to 89.1159 RT Apex: 89.10 FinneganScanNumber: 33736
1	1	PRKDC_HUMAN	DNA-dependent protein kinase catalytic subunit OS=Homo sapiens OX=9606 GN=PRKDC PE=1 SV=3	12983	473749	663	475	246	192	62	12573	1	1	1	573.989	1718.94	3	1718.94	0.0019	0	20.84	0.0082	R	EMKPVIFLDVFLPR	V	Oxidation (M)	0.02000000000000.0			Elution from: 88.0210 to 88.0210 RT Apex: 88.15 FinneganScanNumber: 33349
1	1	PRKDC_HUMAN	DNA-dependent protein kinase catalytic subunit OS=Homo sapiens OX=9606 GN=PRKDC PE=1 SV=3	12983	473749	663	475	246	192	62	12708	1	1	1	578.604	1732.79	3	1732.79	-0.0002	0	39.14	0.00012	K	MDPMNIWDDIITNR	C					Elution from: 98.8730 to 98.8730 RT Apex: 98.90 FinneganScanNumber: 36768
1	1	PRKDC_HUMAN	DNA-dependent protein kinase catalytic subunit OS=Homo sapiens OX=9606 GN=PRKDC PE=1 SV=3	12983	473749	663	475	246	192	62	12709	1	1	1	867.405	1732.8	2	1732.79	0.0044	0	69.08	1.2e-07	K	MDPMNIWDDIITNR	C					Elution from: 98.8441 to 98.8441 RT Apex: 98.94 FinneganScanNumber: 36759
1	1	PRKDC_HUMAN	DNA-dependent protein kinase catalytic subunit OS=Homo sapiens OX=9606 GN=PRKDC PE=1 SV=3	12983	473749	663	475	246	192	62	12880	1	1	1	583.936	1748.79	3	1748.79	-0.0006	0	27.44	0.0018	K	MDPMNIWDDIITNR	C	Oxidation (M)	0.00020000000000.0			Elution from: 90.2568 to 90.2568 RT Apex: 90.31 FinneganScanNumber: 34147
1	1	PRKDC_HUMAN	DNA-dependent protein kinase catalytic subunit OS=Homo sapiens OX=9606 GN=PRKDC PE=1 SV=3	12983	473749	663	475	246	192	62	12949	1	1	1	877.374	1752.73	2	1752.73	0	0	74.84	3.3e-08	R	DPESETDNDSQEIFK	L					Elution from: 46.9062 to 46.9062 RT Apex: 47.10 FinneganScanNumber: 15219
1	1	PRKDC_HUMAN	DNA-dependent protein kinase catalytic subunit OS=Homo sapiens OX=9606 GN=PRKDC PE=1 SV=3	12983	473749	663	475	246	192	62	12950	1	1	1	585.252	1752.73	3	1752.73	0.0004	0	25.42	0.0029	R	DPESETDNDSQEIFK	L					Elution from: 46.9770 to 46.9770 RT Apex: 47.10 FinneganScanNumber: 15257
1	1	PRKDC_HUMAN	DNA-dependent protein kinase catalytic subunit OS=Homo sapiens OX=9606 GN=PRKDC PE=1 SV=3	12983	473749	663	475	246	192	62	12964	1	1	1	877.865	1753.72	2	1753.72	-0.0012	0	20.69	0.0085	R	DPESETDNDSQEIFK	L	Deamidated (NQ)	0.000000010000000.0			Elution from: 50.1290 to 50.1290 RT Apex: 50.05 FinneganScanNumber: 16831
1	1	PRKDC_HUMAN	DNA-dependent protein kinase catalytic subunit OS=Homo sapiens OX=9606 GN=PRKDC PE=1 SV=3	12983	473749	663	475	246	192	62	12965	1	1	1	877.866	1753.72	2	1753.72	0.0012	0	30.65	0.00086	R	DPESETDNDSQEIFK	L	Deamidated (NQ)	0.000000010000000.0			Elution from: 49.1124 to 49.1124 RT Apex: 49.19 FinneganScanNumber: 16304
1	1	PRKDC_HUMAN	DNA-dependent protein kinase catalytic subunit OS=Homo sapiens OX=9606 GN=PRKDC PE=1 SV=3	12983	473749	663	475	246	192	62	13080	1	1	1	884.481	1766.95	2	1766.95	-0.0023	0	23.75	0.0042	R	VLEQLIVAHFPMQSR	E					Elution from: 70.5029 to 70.5029 RT Apex: 70.57 FinneganScanNumber: 26104
1	1	PRKDC_HUMAN	DNA-dependent protein kinase catalytic subunit OS=Homo sapiens OX=9606 GN=PRKDC PE=1 SV=3	12983	473749	663	475	246	192	62	13081	1	1	1	589.99	1766.95	3	1766.95	-0.0014	0	32.58	0.00055	R	VLEQLIVAHFPMQSR	E					Elution from: 71.4459 to 71.4459 RT Apex: 70.61 FinneganScanNumber: 26527
1	1	PRKDC_HUMAN	DNA-dependent protein kinase catalytic subunit OS=Homo sapiens OX=9606 GN=PRKDC PE=1 SV=3	12983	473749	663	475	246	192	62	13082	1	1	1	589.99	1766.95	3	1766.95	-0.0014	0	33.21	0.00048	R	VLEQLIVAHFPMQSR	E					Elution from: 70.4411 to 70.4411 RT Apex: 70.61 FinneganScanNumber: 26079
1	1	PRKDC_HUMAN	DNA-dependent protein kinase catalytic subunit OS=Homo sapiens OX=9606 GN=PRKDC PE=1 SV=3	12983	473749	663	475	246	192	62	13096	1	1	1	884.947	1767.88	2	1767.89	-0.0088	0	81.53	7e-09	K	TVSLLDENNVSSYLSK	N					Elution from: 69.4118 to 69.4118 RT Apex: 69.46 FinneganScanNumber: 25651
1	1	PRKDC_HUMAN	DNA-dependent protein kinase catalytic subunit OS=Homo sapiens OX=9606 GN=PRKDC PE=1 SV=3	12983	473749	663	475	246	192	62	13107	1	1	1	885.442	1768.87	2	1768.87	-0.0028	0	41.51	7.1e-05	K	TVSLLDENNVSSYLSK	N	Deamidated (NQ)	0.0000000100000000.0			Elution from: 70.1703 to 70.1703 RT Apex: 69.46 FinneganScanNumber: 25965
1	1	PRKDC_HUMAN	DNA-dependent protein kinase catalytic subunit OS=Homo sapiens OX=9606 GN=PRKDC PE=1 SV=3	12983	473749	663	475	246	192	62	13108	1	1	1	885.444	1768.87	2	1768.87	-0.0002	0	37.86	0.00016	K	TVSLLDENNVSSYLSK	N	Deamidated (NQ)	0.0000000100000000.0			Elution from: 71.6523 to 71.6523 RT Apex: 71.73 FinneganScanNumber: 26616
1	1	PRKDC_HUMAN	DNA-dependent protein kinase catalytic subunit OS=Homo sapiens OX=9606 GN=PRKDC PE=1 SV=3	12983	473749	663	475	246	192	62	13210	1	1	1	595.322	1782.94	3	1782.95	-0.0003	0	23.05	0.005	R	VLEQLIVAHFPMQSR	E	Oxidation (M)	0.000000000002000.0			Elution from: 63.9334 to 63.9334 RT Apex: 64.26 FinneganScanNumber: 23239
1	1	PRKDC_HUMAN	DNA-dependent protein kinase catalytic subunit OS=Homo sapiens OX=9606 GN=PRKDC PE=1 SV=3	12983	473749	663	475	246	192	62	13211	1	1	1	595.323	1782.95	3	1782.95	0.0027	0	12.33	0.058	R	VLEQLIVAHFPMQSR	E	Oxidation (M)	0.000000000002000.0			Elution from: 65.4166 to 65.4166 RT Apex: 65.10 FinneganScanNumber: 23913
1	1	PRKDC_HUMAN	DNA-dependent protein kinase catalytic subunit OS=Homo sapiens OX=9606 GN=PRKDC PE=1 SV=3	12983	473749	663	475	246	192	62	13370	1	1	1	899.486	1796.96	2	1796.96	-0.0025	0	48.69	1.4e-05	R	SLLTLLWHCSLDALR	E					Elution from: 96.0275 to 96.0275 RT Apex: 96.06 FinneganScanNumber: 36020
1	1	PRKDC_HUMAN	DNA-dependent protein kinase catalytic subunit OS=Homo sapiens OX=9606 GN=PRKDC PE=1 SV=3	12983	473749	663	475	246	192	62	13371	1	1	1	599.994	1796.96	3	1796.96	-0.0011	0	37.5	0.00018	R	SLLTLLWHCSLDALR	E					Elution from: 95.9704 to 95.9704 RT Apex: 96.08 FinneganScanNumber: 36008
1	1	PRKDC_HUMAN	DNA-dependent protein kinase catalytic subunit OS=Homo sapiens OX=9606 GN=PRKDC PE=1 SV=3	12983	473749	663	475	246	192	62	13450	1	1	1	602.625	1804.85	3	1804.85	0.001	0	64.68	3.4e-07	R	MEVQEQEEDISSLIR	S					Elution from: 67.0936 to 67.0936 RT Apex: 67.12 FinneganScanNumber: 24713
1	1	PRKDC_HUMAN	DNA-dependent protein kinase catalytic subunit OS=Homo sapiens OX=9606 GN=PRKDC PE=1 SV=3	12983	473749	663	475	246	192	62	13451	1	1	1	903.434	1804.85	2	1804.85	0.0016	0	76.82	2.1e-08	R	MEVQEQEEDISSLIR	S					Elution from: 67.0297 to 67.0297 RT Apex: 67.12 FinneganScanNumber: 24680
1	1	PRKDC_HUMAN	DNA-dependent protein kinase catalytic subunit OS=Homo sapiens OX=9606 GN=PRKDC PE=1 SV=3	12983	473749	663	475	246	192	62	13575	1	1	1	908.013	1814.01	2	1814.01	-0.0029	0	61.51	7.1e-07	R	TVGALQVLGTEAQSSLLK	A					Elution from: 79.5124 to 79.5124 RT Apex: 78.53 FinneganScanNumber: 30028
1	1	PRKDC_HUMAN	DNA-dependent protein kinase catalytic subunit OS=Homo sapiens OX=9606 GN=PRKDC PE=1 SV=3	12983	473749	663	475	246	192	62	13576	1	1	1	908.015	1814.01	2	1814.01	-0.0001	0	61.99	6.3e-07	R	TVGALQVLGTEAQSSLLK	A					Elution from: 78.3592 to 78.3592 RT Apex: 77.75 FinneganScanNumber: 29551
1	1	PRKDC_HUMAN	DNA-dependent protein kinase catalytic subunit OS=Homo sapiens OX=9606 GN=PRKDC PE=1 SV=3	12983	473749	663	475	246	192	62	13577	1	1	1	605.679	1814.01	3	1814.01	-0.0001	0	58.09	1.6e-06	R	TVGALQVLGTEAQSSLLK	A					Elution from: 79.8486 to 79.8486 RT Apex: 79.01 FinneganScanNumber: 30178
1	1	PRKDC_HUMAN	DNA-dependent protein kinase catalytic subunit OS=Homo sapiens OX=9606 GN=PRKDC PE=1 SV=3	12983	473749	663	475	246	192	62	13578	1	1	1	605.679	1814.02	3	1814.01	0.0002	0	55.06	3.1e-06	R	TVGALQVLGTEAQSSLLK	A					Elution from: 79.0839 to 79.0839 RT Apex: 78.15 FinneganScanNumber: 29847
1	1	PRKDC_HUMAN	DNA-dependent protein kinase catalytic subunit OS=Homo sapiens OX=9606 GN=PRKDC PE=1 SV=3	12983	473749	663	475	246	192	62	13579	1	1	1	908.015	1814.02	2	1814.01	0.0005	0	64.24	3.8e-07	R	TVGALQVLGTEAQSSLLK	A					Elution from: 77.5944 to 77.5944 RT Apex: 77.75 FinneganScanNumber: 29201
1	1	PRKDC_HUMAN	DNA-dependent protein kinase catalytic subunit OS=Homo sapiens OX=9606 GN=PRKDC PE=1 SV=3	12983	473749	663	475	246	192	62	13580	1	1	1	605.679	1814.02	3	1814.01	0.0011	0	54.91	3.2e-06	R	TVGALQVLGTEAQSSLLK	A					Elution from: 78.3275 to 78.3275 RT Apex: 77.72 FinneganScanNumber: 29536
1	1	PRKDC_HUMAN	DNA-dependent protein kinase catalytic subunit OS=Homo sapiens OX=9606 GN=PRKDC PE=1 SV=3	12983	473749	663	475	246	192	62	13581	1	1	1	605.679	1814.02	3	1814.01	0.0017	0	64.24	3.8e-07	R	TVGALQVLGTEAQSSLLK	A					Elution from: 77.5721 to 77.5721 RT Apex: 77.72 FinneganScanNumber: 29191
1	1	PRKDC_HUMAN	DNA-dependent protein kinase catalytic subunit OS=Homo sapiens OX=9606 GN=PRKDC PE=1 SV=3	12983	473749	663	475	246	192	62	13651	1	1	1	607.956	1820.85	3	1820.85	-0.0006	0	30.73	0.00084	R	MEVQEQEEDISSLIR	S	Oxidation (M)	0.200000000000000.0			Elution from: 61.2308 to 61.2308 RT Apex: 61.30 FinneganScanNumber: 22046
1	1	PRKDC_HUMAN	DNA-dependent protein kinase catalytic subunit OS=Homo sapiens OX=9606 GN=PRKDC PE=1 SV=3	12983	473749	663	475	246	192	62	13653	1	1	1	911.43	1820.85	2	1820.85	-0.0001	0	63.19	4.8e-07	R	MEVQEQEEDISSLIR	S	Oxidation (M)	0.200000000000000.0			Elution from: 61.1999 to 61.1999 RT Apex: 61.31 FinneganScanNumber: 22029
1	1	PRKDC_HUMAN	DNA-dependent protein kinase catalytic subunit OS=Homo sapiens OX=9606 GN=PRKDC PE=1 SV=3	12983	473749	663	475	246	192	62	14625	1	1	1	632.296	1893.87	3	1893.87	-0.0009	0	21.6	0.0069	R	EQQHVMEELFQSSFR	R					Elution from: 66.0760 to 66.0760 RT Apex: 66.11 FinneganScanNumber: 24236
1	1	PRKDC_HUMAN	DNA-dependent protein kinase catalytic subunit OS=Homo sapiens OX=9606 GN=PRKDC PE=1 SV=3	12983	473749	663	475	246	192	62	14626	1	1	1	632.296	1893.87	3	1893.87	-0.0006	0	40.23	9.5e-05	R	EQQHVMEELFQSSFR	R					Elution from: 65.0520 to 65.0520 RT Apex: 65.23 FinneganScanNumber: 23739
1	1	PRKDC_HUMAN	DNA-dependent protein kinase catalytic subunit OS=Homo sapiens OX=9606 GN=PRKDC PE=1 SV=3	12983	473749	663	475	246	192	62	14627	1	1	1	947.941	1893.87	2	1893.87	-0.0001	0	40.43	9.1e-05	R	EQQHVMEELFQSSFR	R					Elution from: 65.0919 to 65.0919 RT Apex: 65.23 FinneganScanNumber: 23760
1	1	PRKDC_HUMAN	DNA-dependent protein kinase catalytic subunit OS=Homo sapiens OX=9606 GN=PRKDC PE=1 SV=3	12983	473749	663	475	246	192	62	14747	1	1	1	952.521	1903.03	2	1903.03	-0.0032	0	41.02	7.9e-05	K	LLLQGEADQSLLTFIDK	A					Elution from: 100.3448 to 100.3448 RT Apex: 100.27 FinneganScanNumber: 37335
1	1	PRKDC_HUMAN	DNA-dependent protein kinase catalytic subunit OS=Homo sapiens OX=9606 GN=PRKDC PE=1 SV=3	12983	473749	663	475	246	192	62	14748	1	1	1	952.522	1903.03	2	1903.03	-0.0014	0	90.61	8.7e-10	K	LLLQGEADQSLLTFIDK	A					Elution from: 92.5796 to 92.5796 RT Apex: 92.58 FinneganScanNumber: 34933
1	1	PRKDC_HUMAN	DNA-dependent protein kinase catalytic subunit OS=Homo sapiens OX=9606 GN=PRKDC PE=1 SV=3	12983	473749	663	475	246	192	62	14749	1	1	1	635.351	1903.03	3	1903.03	0.0006	0	6.04	0.25	K	LLLQGEADQSLLTFIDK	A					Elution from: 100.9420 to 100.9420 RT Apex: 100.83 FinneganScanNumber: 37657
1	1	PRKDC_HUMAN	DNA-dependent protein kinase catalytic subunit OS=Homo sapiens OX=9606 GN=PRKDC PE=1 SV=3	12983	473749	663	475	246	192	62	14750	1	1	1	635.351	1903.03	3	1903.03	0.0006	0	53.83	4.1e-06	K	LLLQGEADQSLLTFIDK	A					Elution from: 93.9394 to 93.9394 RT Apex: 92.94 FinneganScanNumber: 35352
1	1	PRKDC_HUMAN	DNA-dependent protein kinase catalytic subunit OS=Homo sapiens OX=9606 GN=PRKDC PE=1 SV=3	12983	473749	663	475	246	192	62	14751	1	1	1	635.351	1903.03	3	1903.03	0.0009	0	70.15	9.7e-08	K	LLLQGEADQSLLTFIDK	A					Elution from: 99.7086 to 99.7086 RT Apex: 99.72 FinneganScanNumber: 36991
1	1	PRKDC_HUMAN	DNA-dependent protein kinase catalytic subunit OS=Homo sapiens OX=9606 GN=PRKDC PE=1 SV=3	12983	473749	663	475	246	192	62	14752	1	1	1	952.523	1903.03	2	1903.03	0.0012	0	64.79	3.3e-07	K	LLLQGEADQSLLTFIDK	A					Elution from: 101.1053 to 101.1053 RT Apex: 100.27 FinneganScanNumber: 37720
1	1	PRKDC_HUMAN	DNA-dependent protein kinase catalytic subunit OS=Homo sapiens OX=9606 GN=PRKDC PE=1 SV=3	12983	473749	663	475	246	192	62	14753	1	1	1	635.351	1903.03	3	1903.03	0.0015	0	47.24	1.9e-05	K	LLLQGEADQSLLTFIDK	A					Elution from: 94.6922 to 94.6922 RT Apex: 94.67 FinneganScanNumber: 35602
1	1	PRKDC_HUMAN	DNA-dependent protein kinase catalytic subunit OS=Homo sapiens OX=9606 GN=PRKDC PE=1 SV=3	12983	473749	663	475	246	192	62	14754	1	1	1	952.523	1903.03	2	1903.03	0.0016	0	53.98	4e-06	K	LLLQGEADQSLLTFIDK	A					Elution from: 96.3371 to 96.3371 RT Apex: 96.32 FinneganScanNumber: 36105
1	1	PRKDC_HUMAN	DNA-dependent protein kinase catalytic subunit OS=Homo sapiens OX=9606 GN=PRKDC PE=1 SV=3	12983	473749	663	475	246	192	62	14755	1	1	1	952.523	1903.03	2	1903.03	0.0018	0	18.77	0.013	K	LLLQGEADQSLLTFIDK	A					Elution from: 106.0417 to 106.0417 RT Apex: 0.00 FinneganScanNumber: 38709
1	1	PRKDC_HUMAN	DNA-dependent protein kinase catalytic subunit OS=Homo sapiens OX=9606 GN=PRKDC PE=1 SV=3	12983	473749	663	475	246	192	62	14756	1	1	1	635.351	1903.03	3	1903.03	0.0018	0	42.64	5.4e-05	K	LLLQGEADQSLLTFIDK	A					Elution from: 92.4344 to 92.4344 RT Apex: 92.54 FinneganScanNumber: 34889
1	1	PRKDC_HUMAN	DNA-dependent protein kinase catalytic subunit OS=Homo sapiens OX=9606 GN=PRKDC PE=1 SV=3	12983	473749	663	475	246	192	62	14757	1	1	1	635.351	1903.03	3	1903.03	0.0021	0	46.49	2.2e-05	K	LLLQGEADQSLLTFIDK	A					Elution from: 95.4491 to 95.4491 RT Apex: 95.43 FinneganScanNumber: 35848
1	1	PRKDC_HUMAN	DNA-dependent protein kinase catalytic subunit OS=Homo sapiens OX=9606 GN=PRKDC PE=1 SV=3	12983	473749	663	475	246	192	62	14758	1	1	1	635.351	1903.03	3	1903.03	0.0021	0	64.12	3.9e-07	K	LLLQGEADQSLLTFIDK	A					Elution from: 93.1857 to 93.1857 RT Apex: 92.54 FinneganScanNumber: 35109
1	1	PRKDC_HUMAN	DNA-dependent protein kinase catalytic subunit OS=Homo sapiens OX=9606 GN=PRKDC PE=1 SV=3	12983	473749	663	475	246	192	62	14843	1	1	1	637.628	1909.86	3	1909.86	-0.0001	0	12.83	0.052	R	EQQHVMEELFQSSFR	R	Oxidation (M)	0.000002000000000.0			Elution from: 49.7513 to 49.7513 RT Apex: 49.91 FinneganScanNumber: 16637
1	1	PRKDC_HUMAN	DNA-dependent protein kinase catalytic subunit OS=Homo sapiens OX=9606 GN=PRKDC PE=1 SV=3	12983	473749	663	475	246	192	62	14987	1	1	1	639.972	1916.89	3	1916.9	-0.0041	0	57.43	1.8e-06	R	ATQQQHDFTLTQTADGR	S					Elution from: 32.8299 to 32.8299 RT Apex: 32.21 FinneganScanNumber: 9148
1	1	PRKDC_HUMAN	DNA-dependent protein kinase catalytic subunit OS=Homo sapiens OX=9606 GN=PRKDC PE=1 SV=3	12983	473749	663	475	246	192	62	14988	1	1	1	639.972	1916.89	3	1916.9	-0.0038	0	65.8	2.6e-07	R	ATQQQHDFTLTQTADGR	S					Elution from: 32.0660 to 32.0660 RT Apex: 32.21 FinneganScanNumber: 8828
1	1	PRKDC_HUMAN	DNA-dependent protein kinase catalytic subunit OS=Homo sapiens OX=9606 GN=PRKDC PE=1 SV=3	12983	473749	663	475	246	192	62	14989	1	1	1	959.455	1916.9	2	1916.9	-0.0022	0	48.28	1.5e-05	R	ATQQQHDFTLTQTADGR	S					Elution from: 33.1577 to 33.1577 RT Apex: 33.11 FinneganScanNumber: 9273
1	1	PRKDC_HUMAN	DNA-dependent protein kinase catalytic subunit OS=Homo sapiens OX=9606 GN=PRKDC PE=1 SV=3	12983	473749	663	475	246	192	62	14991	1	1	1	639.973	1916.9	3	1916.9	-0.0008	0	31.18	0.00076	R	ATQQQHDFTLTQTADGR	S					Elution from: 34.1984 to 34.1984 RT Apex: 33.20 FinneganScanNumber: 9706
1	1	PRKDC_HUMAN	DNA-dependent protein kinase catalytic subunit OS=Homo sapiens OX=9606 GN=PRKDC PE=1 SV=3	12983	473749	663	475	246	192	62	14992	1	1	1	959.456	1916.9	2	1916.9	-0.0004	0	83.91	4.1e-09	R	ATQQQHDFTLTQTADGR	S					Elution from: 32.0901 to 32.0901 RT Apex: 32.21 FinneganScanNumber: 8837
1	1	PRKDC_HUMAN	DNA-dependent protein kinase catalytic subunit OS=Homo sapiens OX=9606 GN=PRKDC PE=1 SV=3	12983	473749	663	475	246	192	62	14993	1	1	1	639.973	1916.9	3	1916.9	0.001	0	34.34	0.00037	R	ATQQQHDFTLTQTADGR	S					Elution from: 35.0952 to 35.0952 RT Apex: 34.16 FinneganScanNumber: 10090
1	1	PRKDC_HUMAN	DNA-dependent protein kinase catalytic subunit OS=Homo sapiens OX=9606 GN=PRKDC PE=1 SV=3	12983	473749	663	475	246	192	62	14994	1	1	1	959.457	1916.9	2	1916.9	0.0024	0	29.03	0.0013	R	ATQQQHDFTLTQTADGR	S					Elution from: 34.0643 to 34.0643 RT Apex: 34.06 FinneganScanNumber: 9650
1	1	PRKDC_HUMAN	DNA-dependent protein kinase catalytic subunit OS=Homo sapiens OX=9606 GN=PRKDC PE=1 SV=3	12983	473749	663	475	246	192	62	15667	1	1	1	656.664	1966.97	3	1966.97	-0.0002	0	37.68	0.00017	R	IMEFTTTLLNTSPEGWK	L					Elution from: 84.6593 to 84.6593 RT Apex: 84.78 FinneganScanNumber: 32188
1	1	PRKDC_HUMAN	DNA-dependent protein kinase catalytic subunit OS=Homo sapiens OX=9606 GN=PRKDC PE=1 SV=3	12983	473749	663	475	246	192	62	15668	1	1	1	984.495	1966.98	2	1966.97	0.0046	0	46.72	2.1e-05	R	IMEFTTTLLNTSPEGWK	L					Elution from: 84.6579 to 84.6579 RT Apex: 84.80 FinneganScanNumber: 32187
1	1	PRKDC_HUMAN	DNA-dependent protein kinase catalytic subunit OS=Homo sapiens OX=9606 GN=PRKDC PE=1 SV=3	12983	473749	663	475	246	192	62	15754	1	1	1	657.644	1969.91	3	1969.91	0.0006	1	34.11	0.00039	K	TRDDWLVSWVQSYCR	L					Elution from: 79.9795 to 79.9795 RT Apex: 80.14 FinneganScanNumber: 30237
1	1	PRKDC_HUMAN	DNA-dependent protein kinase catalytic subunit OS=Homo sapiens OX=9606 GN=PRKDC PE=1 SV=3	12983	473749	663	475	246	192	62	15973	1	1	1	995.511	1989.01	2	1989.01	-0.001	0	57.35	1.8e-06	K	NLDLAVLELMQSSVDNTK	M					Elution from: 99.8500 to 99.8500 RT Apex: 0.00 FinneganScanNumber: 37048
1	1	PRKDC_HUMAN	DNA-dependent protein kinase catalytic subunit OS=Homo sapiens OX=9606 GN=PRKDC PE=1 SV=3	12983	473749	663	475	246	192	62	15974	1	1	1	995.512	1989.01	2	1989.01	0.0006	0	102.06	6.2e-11	K	NLDLAVLELMQSSVDNTK	M					Elution from: 97.4793 to 97.4793 RT Apex: 97.64 FinneganScanNumber: 36452
1	1	PRKDC_HUMAN	DNA-dependent protein kinase catalytic subunit OS=Homo sapiens OX=9606 GN=PRKDC PE=1 SV=3	12983	473749	663	475	246	192	62	15975	1	1	1	664.01	1989.01	3	1989.01	0.0008	0	60.03	9.9e-07	K	NLDLAVLELMQSSVDNTK	M					Elution from: 97.4498 to 97.4498 RT Apex: 97.64 FinneganScanNumber: 36443
1	1	PRKDC_HUMAN	DNA-dependent protein kinase catalytic subunit OS=Homo sapiens OX=9606 GN=PRKDC PE=1 SV=3	12983	473749	663	475	246	192	62	16139	1	1	1	669.342	2005.01	3	2005	0.0013	0	32.06	0.00062	K	NLDLAVLELMQSSVDNTK	M	Oxidation (M)	0.000000000200000000.0			Elution from: 78.3155 to 78.3155 RT Apex: 78.35 FinneganScanNumber: 29530
1	1	PRKDC_HUMAN	DNA-dependent protein kinase catalytic subunit OS=Homo sapiens OX=9606 GN=PRKDC PE=1 SV=3	12983	473749	663	475	246	192	62	16596	1	1	1	1023.96	2045.91	2	2045.91	-0.0007	0	65.92	2.6e-07	K	SLGTIQQCCDAIDHLCR	I					Elution from: 51.0107 to 51.0107 RT Apex: 51.12 FinneganScanNumber: 17254
1	1	PRKDC_HUMAN	DNA-dependent protein kinase catalytic subunit OS=Homo sapiens OX=9606 GN=PRKDC PE=1 SV=3	12983	473749	663	475	246	192	62	16597	1	1	1	682.977	2045.91	3	2045.91	0.0001	0	57.48	1.8e-06	K	SLGTIQQCCDAIDHLCR	I					Elution from: 51.0341 to 51.0341 RT Apex: 51.13 FinneganScanNumber: 17266
1	1	PRKDC_HUMAN	DNA-dependent protein kinase catalytic subunit OS=Homo sapiens OX=9606 GN=PRKDC PE=1 SV=3	12983	473749	663	475	246	192	62	16598	1	1	1	1024	2045.98	2	2045.98	-0.0014	0	82.9	5.1e-09	K	INQVFHGSCITEGNELTK	T					Elution from: 44.3607 to 44.3607 RT Apex: 44.48 FinneganScanNumber: 13992
1	1	PRKDC_HUMAN	DNA-dependent protein kinase catalytic subunit OS=Homo sapiens OX=9606 GN=PRKDC PE=1 SV=3	12983	473749	663	475	246	192	62	16599	1	1	1	683.002	2045.99	3	2045.98	0.0013	0	36.84	0.00021	K	INQVFHGSCITEGNELTK	T					Elution from: 44.3290 to 44.3290 RT Apex: 44.48 FinneganScanNumber: 13981
1	1	PRKDC_HUMAN	DNA-dependent protein kinase catalytic subunit OS=Homo sapiens OX=9606 GN=PRKDC PE=1 SV=3	12983	473749	663	475	246	192	62	16610	1	1	1	1024.49	2046.96	2	2046.97	-0.0034	0	21.71	0.0067	K	INQVFHGSCITEGNELTK	T	Deamidated (NQ)	0.010000000000000000.0			Elution from: 49.5719 to 49.5719 RT Apex: 49.62 FinneganScanNumber: 16547
1	1	PRKDC_HUMAN	DNA-dependent protein kinase catalytic subunit OS=Homo sapiens OX=9606 GN=PRKDC PE=1 SV=3	12983	473749	663	475	246	192	62	16611	1	1	1	1024.49	2046.97	2	2046.97	-0.0002	0	71.06	7.8e-08	K	INQVFHGSCITEGNELTK	T	Deamidated (NQ)	0.000000000000010000.0			Elution from: 46.1511 to 46.1511 RT Apex: 46.24 FinneganScanNumber: 14867
1	1	PRKDC_HUMAN	DNA-dependent protein kinase catalytic subunit OS=Homo sapiens OX=9606 GN=PRKDC PE=1 SV=3	12983	473749	663	475	246	192	62	16612	1	1	1	683.331	2046.97	3	2046.97	0.0028	0	60.84	8.2e-07	K	INQVFHGSCITEGNELTK	T	Deamidated (NQ)	0.000000000000010000.0			Elution from: 46.0994 to 46.0994 RT Apex: 46.21 FinneganScanNumber: 14840
1	1	PRKDC_HUMAN	DNA-dependent protein kinase catalytic subunit OS=Homo sapiens OX=9606 GN=PRKDC PE=1 SV=3	12983	473749	663	475	246	192	62	16670	1	1	1	684.691	2051.05	3	2051.05	0.0008	0	68.27	1.5e-07	K	QLASGLLELAFAFGGLCER	L					Elution from: 99.9521 to 99.9521 RT Apex: 99.94 FinneganScanNumber: 37106
1	1	PRKDC_HUMAN	DNA-dependent protein kinase catalytic subunit OS=Homo sapiens OX=9606 GN=PRKDC PE=1 SV=3	12983	473749	663	475	246	192	62	16671	1	1	1	1026.53	2051.05	2	2051.05	0.0015	0	82.79	5.3e-09	K	QLASGLLELAFAFGGLCER	L					Elution from: 99.9493 to 99.9493 RT Apex: 99.94 FinneganScanNumber: 37104
1	1	PRKDC_HUMAN	DNA-dependent protein kinase catalytic subunit OS=Homo sapiens OX=9606 GN=PRKDC PE=1 SV=3	12983	473749	663	475	246	192	62	16789	1	1	1	689.661	2065.96	3	2065.96	-0.0001	0	23.01	0.005	K	ATQMPEGGQGAPPMYQLYK	R					Elution from: 58.2620 to 58.2620 RT Apex: 58.37 FinneganScanNumber: 20654
1	1	PRKDC_HUMAN	DNA-dependent protein kinase catalytic subunit OS=Homo sapiens OX=9606 GN=PRKDC PE=1 SV=3	12983	473749	663	475	246	192	62	16790	1	1	1	1033.99	2065.96	2	2065.96	0.0005	0	66.81	2.1e-07	K	ATQMPEGGQGAPPMYQLYK	R					Elution from: 58.2529 to 58.2529 RT Apex: 58.34 FinneganScanNumber: 20650
1	1	PRKDC_HUMAN	DNA-dependent protein kinase catalytic subunit OS=Homo sapiens OX=9606 GN=PRKDC PE=1 SV=3	12983	473749	663	475	246	192	62	16873	1	1	1	1038	2073.98	2	2073.99	-0.0035	0	85.88	2.6e-09	R	GSCVTQVGLLESVYEMFR	K					Elution from: 99.9016 to 99.9016 RT Apex: 99.89 FinneganScanNumber: 37076
1	1	PRKDC_HUMAN	DNA-dependent protein kinase catalytic subunit OS=Homo sapiens OX=9606 GN=PRKDC PE=1 SV=3	12983	473749	663	475	246	192	62	16882	1	1	1	692.699	2075.08	3	2075.08	-0.0009	0	30.26	0.00094	K	AVAFFLESIAMHDIIAAEK	C					Elution from: 96.6734 to 96.6734 RT Apex: 96.66 FinneganScanNumber: 36208
1	1	PRKDC_HUMAN	DNA-dependent protein kinase catalytic subunit OS=Homo sapiens OX=9606 GN=PRKDC PE=1 SV=3	12983	473749	663	475	246	192	62	16883	1	1	1	692.699	2075.08	3	2075.08	0.0003	0	48.41	1.4e-05	K	AVAFFLESIAMHDIIAAEK	C					Elution from: 94.0031 to 94.0031 RT Apex: 94.20 FinneganScanNumber: 35377
1	1	PRKDC_HUMAN	DNA-dependent protein kinase catalytic subunit OS=Homo sapiens OX=9606 GN=PRKDC PE=1 SV=3	12983	473749	663	475	246	192	62	16884	1	1	1	692.699	2075.08	3	2075.08	0.0006	0	49.96	1e-05	K	AVAFFLESIAMHDIIAAEK	C					Elution from: 95.5673 to 95.5673 RT Apex: 95.67 FinneganScanNumber: 35895
1	1	PRKDC_HUMAN	DNA-dependent protein kinase catalytic subunit OS=Homo sapiens OX=9606 GN=PRKDC PE=1 SV=3	12983	473749	663	475	246	192	62	16886	1	1	1	692.7	2075.08	3	2075.08	0.0012	0	42.27	5.9e-05	K	AVAFFLESIAMHDIIAAEK	C					Elution from: 94.7611 to 94.7611 RT Apex: 94.20 FinneganScanNumber: 35623
1	1	PRKDC_HUMAN	DNA-dependent protein kinase catalytic subunit OS=Homo sapiens OX=9606 GN=PRKDC PE=1 SV=3	12983	473749	663	475	246	192	62	16887	1	1	1	692.7	2075.08	3	2075.08	0.0012	0	41.27	7.5e-05	K	AVAFFLESIAMHDIIAAEK	C					Elution from: 99.6589 to 99.6589 RT Apex: 99.67 FinneganScanNumber: 36973
1	1	PRKDC_HUMAN	DNA-dependent protein kinase catalytic subunit OS=Homo sapiens OX=9606 GN=PRKDC PE=1 SV=3	12983	473749	663	475	246	192	62	16888	1	1	1	1038.55	2075.08	2	2075.08	0.0013	0	62.69	5.4e-07	K	AVAFFLESIAMHDIIAAEK	C					Elution from: 94.0662 to 94.0662 RT Apex: 94.20 FinneganScanNumber: 35402
1	1	PRKDC_HUMAN	DNA-dependent protein kinase catalytic subunit OS=Homo sapiens OX=9606 GN=PRKDC PE=1 SV=3	12983	473749	663	475	246	192	62	16889	1	1	1	692.7	2075.08	3	2075.08	0.003	0	1.83	0.66	K	AVAFFLESIAMHDIIAAEK	C					Elution from: 106.0305 to 106.0305 RT Apex: 106.01 FinneganScanNumber: 38704
1	1	PRKDC_HUMAN	DNA-dependent protein kinase catalytic subunit OS=Homo sapiens OX=9606 GN=PRKDC PE=1 SV=3	12983	473749	663	475	246	192	62	16928	1	1	1	1041.99	2081.96	2	2081.95	0.003	0	59.41	1.1e-06	K	ATQMPEGGQGAPPMYQLYK	R	Oxidation (M)	0.0002000000000000000.0			Elution from: 52.6116 to 52.6116 RT Apex: 52.65 FinneganScanNumber: 18030
1	1	PRKDC_HUMAN	DNA-dependent protein kinase catalytic subunit OS=Homo sapiens OX=9606 GN=PRKDC PE=1 SV=3	12983	473749	663	475	246	192	62	16968	1	1	1	522.016	2084.04	4	2084.04	0	0	15.38	0.029	R	ELLNPVVEFVSHPSTTCR	E					Elution from: 70.8761 to 70.8761 RT Apex: 70.96 FinneganScanNumber: 26275
1	1	PRKDC_HUMAN	DNA-dependent protein kinase catalytic subunit OS=Homo sapiens OX=9606 GN=PRKDC PE=1 SV=3	12983	473749	663	475	246	192	62	16969	1	1	1	695.686	2084.04	3	2084.04	0.0007	0	36.51	0.00022	R	ELLNPVVEFVSHPSTTCR	E					Elution from: 70.7392 to 70.7392 RT Apex: 70.93 FinneganScanNumber: 26214
1	1	PRKDC_HUMAN	DNA-dependent protein kinase catalytic subunit OS=Homo sapiens OX=9606 GN=PRKDC PE=1 SV=3	12983	473749	663	475	246	192	62	16970	1	1	1	695.687	2084.04	3	2084.04	0.0019	0	33.45	0.00045	R	ELLNPVVEFVSHPSTTCR	E					Elution from: 71.4965 to 71.4965 RT Apex: 70.93 FinneganScanNumber: 26553
1	1	PRKDC_HUMAN	DNA-dependent protein kinase catalytic subunit OS=Homo sapiens OX=9606 GN=PRKDC PE=1 SV=3	12983	473749	663	475	246	192	62	16971	1	1	1	1043.03	2084.04	2	2084.04	0.0032	0	71.19	7.6e-08	R	ELLNPVVEFVSHPSTTCR	E					Elution from: 71.0556 to 71.0556 RT Apex: 70.93 FinneganScanNumber: 26353
1	1	PRKDC_HUMAN	DNA-dependent protein kinase catalytic subunit OS=Homo sapiens OX=9606 GN=PRKDC PE=1 SV=3	12983	473749	663	475	246	192	62	17012	1	1	1	1046	2089.98	2	2089.98	0.0016	0	36.99	0.0002	R	GSCVTQVGLLESVYEMFR	K	Oxidation (M)	0.000000000000000200.0			Elution from: 92.1453 to 92.1453 RT Apex: 92.17 FinneganScanNumber: 34796
1	1	PRKDC_HUMAN	DNA-dependent protein kinase catalytic subunit OS=Homo sapiens OX=9606 GN=PRKDC PE=1 SV=3	12983	473749	663	475	246	192	62	17013	1	1	1	697.668	2089.98	3	2089.98	0.0018	0	47.82	1.7e-05	R	GSCVTQVGLLESVYEMFR	K	Oxidation (M)	0.000000000000000200.0			Elution from: 92.0998 to 92.0998 RT Apex: 92.12 FinneganScanNumber: 34781
1	1	PRKDC_HUMAN	DNA-dependent protein kinase catalytic subunit OS=Homo sapiens OX=9606 GN=PRKDC PE=1 SV=3	12983	473749	663	475	246	192	62	17031	1	1	1	698.032	2091.07	3	2091.07	0.0019	0	47.78	1.7e-05	K	AVAFFLESIAMHDIIAAEK	C	Oxidation (M)	0.0000000000200000000.0			Elution from: 86.1174 to 86.1174 RT Apex: 86.18 FinneganScanNumber: 32706
1	1	PRKDC_HUMAN	DNA-dependent protein kinase catalytic subunit OS=Homo sapiens OX=9606 GN=PRKDC PE=1 SV=3	12983	473749	663	475	246	192	62	17032	1	1	1	698.032	2091.07	3	2091.07	0.0034	0	43.44	4.5e-05	K	AVAFFLESIAMHDIIAAEK	C	Oxidation (M)	0.0000000000200000000.0			Elution from: 88.3863 to 88.3863 RT Apex: 88.12 FinneganScanNumber: 33466
1	1	PRKDC_HUMAN	DNA-dependent protein kinase catalytic subunit OS=Homo sapiens OX=9606 GN=PRKDC PE=1 SV=3	12983	473749	663	475	246	192	62	17336	1	1	1	1060.11	2118.2	2	2118.2	-0.0006	0	103.59	4.4e-11	K	DVLIQGLIDENPGLQLIIR	N					Elution from: 99.9184 to 99.9184 RT Apex: 99.91 FinneganScanNumber: 37085
1	1	PRKDC_HUMAN	DNA-dependent protein kinase catalytic subunit OS=Homo sapiens OX=9606 GN=PRKDC PE=1 SV=3	12983	473749	663	475	246	192	62	17337	1	1	1	1060.11	2118.2	2	2118.2	0	0	9.76	0.11	K	DVLIQGLIDENPGLQLIIR	N					Elution from: 101.0667 to 101.0667 RT Apex: 100.97 FinneganScanNumber: 37708
1	1	PRKDC_HUMAN	DNA-dependent protein kinase catalytic subunit OS=Homo sapiens OX=9606 GN=PRKDC PE=1 SV=3	12983	473749	663	475	246	192	62	17338	1	1	1	707.076	2118.21	3	2118.2	0.0025	0	84.01	4e-09	K	DVLIQGLIDENPGLQLIIR	N					Elution from: 99.9213 to 99.9213 RT Apex: 99.91 FinneganScanNumber: 37087
1	1	PRKDC_HUMAN	DNA-dependent protein kinase catalytic subunit OS=Homo sapiens OX=9606 GN=PRKDC PE=1 SV=3	12983	473749	663	475	246	192	62	17361	1	1	1	707.705	2120.09	3	2120.09	0.0002	0	61.85	6.5e-07	K	LAGANPAVITCDELLLGHEK	A					Elution from: 66.0140 to 66.0140 RT Apex: 65.37 FinneganScanNumber: 24208
1	1	PRKDC_HUMAN	DNA-dependent protein kinase catalytic subunit OS=Homo sapiens OX=9606 GN=PRKDC PE=1 SV=3	12983	473749	663	475	246	192	62	17362	1	1	1	531.031	2120.09	4	2120.09	0.0013	0	38.95	0.00013	K	LAGANPAVITCDELLLGHEK	A					Elution from: 65.4271 to 65.4271 RT Apex: 65.37 FinneganScanNumber: 23918
1	1	PRKDC_HUMAN	DNA-dependent protein kinase catalytic subunit OS=Homo sapiens OX=9606 GN=PRKDC PE=1 SV=3	12983	473749	663	475	246	192	62	17363	1	1	1	707.706	2120.1	3	2120.09	0.0023	0	41.98	6.3e-05	K	LAGANPAVITCDELLLGHEK	A					Elution from: 66.8657 to 66.8657 RT Apex: 66.86 FinneganScanNumber: 24597
1	1	PRKDC_HUMAN	DNA-dependent protein kinase catalytic subunit OS=Homo sapiens OX=9606 GN=PRKDC PE=1 SV=3	12983	473749	663	475	246	192	62	17364	1	1	1	707.706	2120.1	3	2120.09	0.0029	0	71.27	7.5e-08	K	LAGANPAVITCDELLLGHEK	A					Elution from: 65.1690 to 65.1690 RT Apex: 65.37 FinneganScanNumber: 23794
1	1	PRKDC_HUMAN	DNA-dependent protein kinase catalytic subunit OS=Homo sapiens OX=9606 GN=PRKDC PE=1 SV=3	12983	473749	663	475	246	192	62	17365	1	1	1	1061.06	2120.1	2	2120.09	0.0033	0	62.14	6.1e-07	K	LAGANPAVITCDELLLGHEK	A					Elution from: 65.2433 to 65.2433 RT Apex: 65.37 FinneganScanNumber: 23829
1	1	PRKDC_HUMAN	DNA-dependent protein kinase catalytic subunit OS=Homo sapiens OX=9606 GN=PRKDC PE=1 SV=3	12983	473749	663	475	246	192	62	17562	1	1	1	1070.5	2138.98	2	2138.98	0.0002	0	66.78	2.1e-07	R	DPTVHDDVLELEMDELNR	H					Elution from: 74.7635 to 74.7635 RT Apex: 74.89 FinneganScanNumber: 27993
1	1	PRKDC_HUMAN	DNA-dependent protein kinase catalytic subunit OS=Homo sapiens OX=9606 GN=PRKDC PE=1 SV=3	12983	473749	663	475	246	192	62	17563	1	1	1	714.001	2138.98	3	2138.98	0.001	0	48.88	1.3e-05	R	DPTVHDDVLELEMDELNR	H					Elution from: 74.7134 to 74.7134 RT Apex: 74.89 FinneganScanNumber: 27974
1	1	PRKDC_HUMAN	DNA-dependent protein kinase catalytic subunit OS=Homo sapiens OX=9606 GN=PRKDC PE=1 SV=3	12983	473749	663	475	246	192	62	17766	1	1	1	719.332	2154.98	3	2154.97	0.0014	0	41.12	7.7e-05	R	DPTVHDDVLELEMDELNR	H	Oxidation (M)	0.000000000000200000.0			Elution from: 66.2248 to 66.2248 RT Apex: 66.33 FinneganScanNumber: 24301
1	1	PRKDC_HUMAN	DNA-dependent protein kinase catalytic subunit OS=Homo sapiens OX=9606 GN=PRKDC PE=1 SV=3	12983	473749	663	475	246	192	62	18018	1	1	1	725.028	2172.06	3	2172.06	-0.001	0	55.93	2.6e-06	R	IIANALSSEPACLAEIEEDK	A					Elution from: 71.1117 to 71.1117 RT Apex: 71.33 FinneganScanNumber: 26374
1	1	PRKDC_HUMAN	DNA-dependent protein kinase catalytic subunit OS=Homo sapiens OX=9606 GN=PRKDC PE=1 SV=3	12983	473749	663	475	246	192	62	18019	1	1	1	1087.04	2172.06	2	2172.06	-0.0005	0	69.96	1e-07	R	IIANALSSEPACLAEIEEDK	A					Elution from: 71.1287 to 71.1287 RT Apex: 71.38 FinneganScanNumber: 26380
1	1	PRKDC_HUMAN	DNA-dependent protein kinase catalytic subunit OS=Homo sapiens OX=9606 GN=PRKDC PE=1 SV=3	12983	473749	663	475	246	192	62	18020	1	1	1	725.028	2172.06	3	2172.06	0.0014	0	41.41	7.2e-05	R	IIANALSSEPACLAEIEEDK	A					Elution from: 72.1008 to 72.1008 RT Apex: 71.33 FinneganScanNumber: 26809
1	1	PRKDC_HUMAN	DNA-dependent protein kinase catalytic subunit OS=Homo sapiens OX=9606 GN=PRKDC PE=1 SV=3	12983	473749	663	475	246	192	62	18032	1	1	1	725.356	2173.04	3	2173.05	-0.0013	0	47.01	2e-05	R	IIANALSSEPACLAEIEEDK	A	Deamidated (NQ)	0.00010000000000000000.0			Elution from: 73.6597 to 73.6597 RT Apex: 73.76 FinneganScanNumber: 27509
1	1	PRKDC_HUMAN	DNA-dependent protein kinase catalytic subunit OS=Homo sapiens OX=9606 GN=PRKDC PE=1 SV=3	12983	473749	663	475	246	192	62	18033	1	1	1	725.356	2173.05	3	2173.05	-0.001	0	42.11	6.2e-05	R	IIANALSSEPACLAEIEEDK	A	Deamidated (NQ)	0.00010000000000000000.0			Elution from: 74.8446 to 74.8446 RT Apex: 74.86 FinneganScanNumber: 28030
1	1	PRKDC_HUMAN	DNA-dependent protein kinase catalytic subunit OS=Homo sapiens OX=9606 GN=PRKDC PE=1 SV=3	12983	473749	663	475	246	192	62	18034	1	1	1	1087.53	2173.05	2	2173.05	0.0001	0	52.95	5.1e-06	R	IIANALSSEPACLAEIEEDK	A	Deamidated (NQ)	0.00010000000000000000.0			Elution from: 73.6955 to 73.6955 RT Apex: 73.75 FinneganScanNumber: 27527
1	1	PRKDC_HUMAN	DNA-dependent protein kinase catalytic subunit OS=Homo sapiens OX=9606 GN=PRKDC PE=1 SV=3	12983	473749	663	475	246	192	62	18135	1	1	1	1091.09	2180.17	2	2180.17	0.0002	0	80.47	9e-09	K	LQSVQALTEIQEFISFISK	Q					Elution from: 99.9701 to 99.9701 RT Apex: 99.96 FinneganScanNumber: 37116
1	1	PRKDC_HUMAN	DNA-dependent protein kinase catalytic subunit OS=Homo sapiens OX=9606 GN=PRKDC PE=1 SV=3	12983	473749	663	475	246	192	62	18136	1	1	1	727.732	2180.18	3	2180.17	0.0028	0	81.84	6.5e-09	K	LQSVQALTEIQEFISFISK	Q					Elution from: 99.9715 to 99.9715 RT Apex: 100.06 FinneganScanNumber: 37117
1	1	PRKDC_HUMAN	DNA-dependent protein kinase catalytic subunit OS=Homo sapiens OX=9606 GN=PRKDC PE=1 SV=3	12983	473749	663	475	246	192	62	18747	1	1	1	1118.54	2235.07	2	2235.07	0.003	0	67.91	1.6e-07	K	IWSEPFYQETYLPYMIR	S					Elution from: 94.1465 to 94.1465 RT Apex: 94.12 FinneganScanNumber: 35426
1	1	PRKDC_HUMAN	DNA-dependent protein kinase catalytic subunit OS=Homo sapiens OX=9606 GN=PRKDC PE=1 SV=3	12983	473749	663	475	246	192	62	18748	1	1	1	746.032	2235.07	3	2235.07	0.0037	0	26.62	0.0022	K	IWSEPFYQETYLPYMIR	S					Elution from: 94.0413 to 94.0413 RT Apex: 94.12 FinneganScanNumber: 35393
1	1	PRKDC_HUMAN	DNA-dependent protein kinase catalytic subunit OS=Homo sapiens OX=9606 GN=PRKDC PE=1 SV=3	12983	473749	663	475	246	192	62	18796	1	1	1	1120.5	2238.99	2	2238.99	-0.003	0	107.57	1.8e-11	K	SLEYCSTASIDSENPPDLNK	I					Elution from: 53.6298 to 53.6298 RT Apex: 53.78 FinneganScanNumber: 18414
1	1	PRKDC_HUMAN	DNA-dependent protein kinase catalytic subunit OS=Homo sapiens OX=9606 GN=PRKDC PE=1 SV=3	12983	473749	663	475	246	192	62	18797	1	1	1	747.338	2238.99	3	2238.99	-0.0026	0	33.22	0.00048	K	SLEYCSTASIDSENPPDLNK	I					Elution from: 53.6312 to 53.6312 RT Apex: 53.73 FinneganScanNumber: 18415
1	1	PRKDC_HUMAN	DNA-dependent protein kinase catalytic subunit OS=Homo sapiens OX=9606 GN=PRKDC PE=1 SV=3	12983	473749	663	475	246	192	62	18798	1	1	1	747.339	2239	3	2238.99	0.0001	0	7.48	0.18	K	SLEYCSTASIDSENPPDLNK	I					Elution from: 55.4828 to 55.4828 RT Apex: 54.53 FinneganScanNumber: 19286
1	1	PRKDC_HUMAN	DNA-dependent protein kinase catalytic subunit OS=Homo sapiens OX=9606 GN=PRKDC PE=1 SV=3	12983	473749	663	475	246	192	62	18799	1	1	1	1120.51	2239	2	2238.99	0.0004	0	108.68	1.4e-11	K	SLEYCSTASIDSENPPDLNK	I					Elution from: 54.3873 to 54.3873 RT Apex: 53.78 FinneganScanNumber: 18751
1	1	PRKDC_HUMAN	DNA-dependent protein kinase catalytic subunit OS=Homo sapiens OX=9606 GN=PRKDC PE=1 SV=3	12983	473749	663	475	246	192	62	18800	1	1	1	747.339	2239	3	2238.99	0.001	0	10.81	0.083	K	SLEYCSTASIDSENPPDLNK	I					Elution from: 54.4267 to 54.4267 RT Apex: 53.73 FinneganScanNumber: 18774
1	1	PRKDC_HUMAN	DNA-dependent protein kinase catalytic subunit OS=Homo sapiens OX=9606 GN=PRKDC PE=1 SV=3	12983	473749	663	475	246	192	62	18801	1	1	1	1120.51	2239	2	2238.99	0.0014	0	93.16	4.8e-10	K	SLEYCSTASIDSENPPDLNK	I					Elution from: 55.1512 to 55.1512 RT Apex: 54.15 FinneganScanNumber: 19121
1	1	PRKDC_HUMAN	DNA-dependent protein kinase catalytic subunit OS=Homo sapiens OX=9606 GN=PRKDC PE=1 SV=3	12983	473749	663	475	246	192	62	18802	1	1	1	1120.51	2239	2	2238.99	0.0038	0	72.96	5.1e-08	K	SLEYCSTASIDSENPPDLNK	I					Elution from: 56.8747 to 56.8747 RT Apex: 56.33 FinneganScanNumber: 19987
1	1	PRKDC_HUMAN	DNA-dependent protein kinase catalytic subunit OS=Homo sapiens OX=9606 GN=PRKDC PE=1 SV=3	12983	473749	663	475	246	192	62	18803	1	1	1	1120.51	2239	2	2238.99	0.0042	0	70.59	8.7e-08	K	SLEYCSTASIDSENPPDLNK	I					Elution from: 55.9547 to 55.9547 RT Apex: 54.96 FinneganScanNumber: 19519
1	1	PRKDC_HUMAN	DNA-dependent protein kinase catalytic subunit OS=Homo sapiens OX=9606 GN=PRKDC PE=1 SV=3	12983	473749	663	475	246	192	62	18905	1	1	1	563.055	2248.19	4	2248.19	0.0016	1	53.19	4.8e-06	R	KLAGANPAVITCDELLLGHEK	A					Elution from: 56.2754 to 56.2754 RT Apex: 56.35 FinneganScanNumber: 19672
1	1	PRKDC_HUMAN	DNA-dependent protein kinase catalytic subunit OS=Homo sapiens OX=9606 GN=PRKDC PE=1 SV=3	12983	473749	663	475	246	192	62	18906	1	1	1	750.404	2248.19	3	2248.19	0.0016	1	67.29	1.9e-07	R	KLAGANPAVITCDELLLGHEK	A					Elution from: 56.3366 to 56.3366 RT Apex: 56.36 FinneganScanNumber: 19706
1	1	PRKDC_HUMAN	DNA-dependent protein kinase catalytic subunit OS=Homo sapiens OX=9606 GN=PRKDC PE=1 SV=3	12983	473749	663	475	246	192	62	19140	1	1	1	1137.51	2273.01	2	2273.01	-0.0008	0	110.46	9e-12	K	LCYDAFTENMAGENQLLER	R					Elution from: 74.5155 to 74.5155 RT Apex: 74.59 FinneganScanNumber: 27895
1	1	PRKDC_HUMAN	DNA-dependent protein kinase catalytic subunit OS=Homo sapiens OX=9606 GN=PRKDC PE=1 SV=3	12983	473749	663	475	246	192	62	19304	1	1	1	1145.51	2289.01	2	2289	0.0009	0	79.76	1.1e-08	K	LCYDAFTENMAGENQLLER	R	Oxidation (M)	0.0000000002000000000.0			Elution from: 66.1039 to 66.1039 RT Apex: 66.16 FinneganScanNumber: 24251
1	1	PRKDC_HUMAN	DNA-dependent protein kinase catalytic subunit OS=Homo sapiens OX=9606 GN=PRKDC PE=1 SV=3	12983	473749	663	475	246	192	62	19358	1	1	1	1148.09	2294.16	2	2294.16	0.0008	0	88.4	1.4e-09	R	STVLTPMFVETQASQGTLQTR	T					Elution from: 71.7479 to 71.7479 RT Apex: 71.84 FinneganScanNumber: 26657
1	1	PRKDC_HUMAN	DNA-dependent protein kinase catalytic subunit OS=Homo sapiens OX=9606 GN=PRKDC PE=1 SV=3	12983	473749	663	475	246	192	62	19381	1	1	1	766.348	2296.02	3	2296.03	-0.0025	0	42.04	6.3e-05	K	DFWELASLDCYNHLAEWK	S					Elution from: 93.4612 to 93.4612 RT Apex: 93.63 FinneganScanNumber: 35201
1	1	PRKDC_HUMAN	DNA-dependent protein kinase catalytic subunit OS=Homo sapiens OX=9606 GN=PRKDC PE=1 SV=3	12983	473749	663	475	246	192	62	19382	1	1	1	1149.02	2296.03	2	2296.03	0	0	50.79	8.3e-06	K	DFWELASLDCYNHLAEWK	S					Elution from: 93.5208 to 93.5208 RT Apex: 93.64 FinneganScanNumber: 35220
1	1	PRKDC_HUMAN	DNA-dependent protein kinase catalytic subunit OS=Homo sapiens OX=9606 GN=PRKDC PE=1 SV=3	12983	473749	663	475	246	192	62	19394	1	1	1	766.677	2297.01	3	2297.01	-0.0004	0	52.36	5.8e-06	K	DFWELASLDCYNHLAEWK	S	Deamidated (NQ)	0.000000000001000000.0			Elution from: 96.7304 to 96.7304 RT Apex: 96.77 FinneganScanNumber: 36225
1	1	PRKDC_HUMAN	DNA-dependent protein kinase catalytic subunit OS=Homo sapiens OX=9606 GN=PRKDC PE=1 SV=3	12983	473749	663	475	246	192	62	19522	1	1	1	771.058	2310.15	3	2310.15	-0.0001	0	54.39	3.6e-06	R	STVLTPMFVETQASQGTLQTR	T	Oxidation (M)	0.000000200000000000000.0			Elution from: 64.5129 to 64.5129 RT Apex: 64.53 FinneganScanNumber: 23496
1	1	PRKDC_HUMAN	DNA-dependent protein kinase catalytic subunit OS=Homo sapiens OX=9606 GN=PRKDC PE=1 SV=3	12983	473749	663	475	246	192	62	19523	1	1	1	1156.09	2310.16	2	2310.15	0.0037	0	75.99	2.5e-08	R	STVLTPMFVETQASQGTLQTR	T	Oxidation (M)	0.000000200000000000000.0			Elution from: 64.4499 to 64.4499 RT Apex: 64.50 FinneganScanNumber: 23467
1	1	PRKDC_HUMAN	DNA-dependent protein kinase catalytic subunit OS=Homo sapiens OX=9606 GN=PRKDC PE=1 SV=3	12983	473749	663	475	246	192	62	19561	1	1	1	772.341	2314	3	2314	-0.0005	0	42.92	5.1e-05	K	LTPLPEDNSMNVDQDGDPSDR	M					Elution from: 54.5768 to 54.5768 RT Apex: 54.72 FinneganScanNumber: 18847
1	1	PRKDC_HUMAN	DNA-dependent protein kinase catalytic subunit OS=Homo sapiens OX=9606 GN=PRKDC PE=1 SV=3	12983	473749	663	475	246	192	62	19562	1	1	1	772.342	2314	3	2314	0.0016	0	23.9	0.0041	K	LTPLPEDNSMNVDQDGDPSDR	M					Elution from: 55.3780 to 55.3780 RT Apex: 54.72 FinneganScanNumber: 19234
1	1	PRKDC_HUMAN	DNA-dependent protein kinase catalytic subunit OS=Homo sapiens OX=9606 GN=PRKDC PE=1 SV=3	12983	473749	663	475	246	192	62	19563	1	1	1	1158.01	2314	2	2314	0.0025	0	76.95	2e-08	K	LTPLPEDNSMNVDQDGDPSDR	M					Elution from: 54.5928 to 54.5928 RT Apex: 54.74 FinneganScanNumber: 18856
1	1	PRKDC_HUMAN	DNA-dependent protein kinase catalytic subunit OS=Homo sapiens OX=9606 GN=PRKDC PE=1 SV=3	12983	473749	663	475	246	192	62	19573	1	1	1	1158.5	2314.99	2	2314.99	-0.0007	0	31.72	0.00067	K	LTPLPEDNSMNVDQDGDPSDR	M	Deamidated (NQ)	0.000000000010000000000.0			Elution from: 56.6323 to 56.6323 RT Apex: 56.70 FinneganScanNumber: 19860
1	1	PRKDC_HUMAN	DNA-dependent protein kinase catalytic subunit OS=Homo sapiens OX=9606 GN=PRKDC PE=1 SV=3	12983	473749	663	475	246	192	62	19574	1	1	1	772.67	2314.99	3	2314.99	0.0013	0	11.62	0.069	K	LTPLPEDNSMNVDQDGDPSDR	M	Deamidated (NQ)	0.000000010000000000000.0			Elution from: 56.6850 to 56.6850 RT Apex: 56.71 FinneganScanNumber: 19887
1	1	PRKDC_HUMAN	DNA-dependent protein kinase catalytic subunit OS=Homo sapiens OX=9606 GN=PRKDC PE=1 SV=3	12983	473749	663	475	246	192	62	19699	1	1	1	1166.01	2330	2	2330	-0.0008	0	55.9	2.6e-06	K	LTPLPEDNSMNVDQDGDPSDR	M	Oxidation (M)	0.000000000200000000000.0			Elution from: 46.2638 to 46.2638 RT Apex: 46.38 FinneganScanNumber: 14918
1	1	PRKDC_HUMAN	DNA-dependent protein kinase catalytic subunit OS=Homo sapiens OX=9606 GN=PRKDC PE=1 SV=3	12983	473749	663	475	246	192	62	19700	1	1	1	777.674	2330	3	2330	0.0021	0	53.67	4.3e-06	K	LTPLPEDNSMNVDQDGDPSDR	M	Oxidation (M)	0.000000000200000000000.0			Elution from: 46.3529 to 46.3529 RT Apex: 46.36 FinneganScanNumber: 14957
1	1	PRKDC_HUMAN	DNA-dependent protein kinase catalytic subunit OS=Homo sapiens OX=9606 GN=PRKDC PE=1 SV=3	12983	473749	663	475	246	192	62	19735	1	1	1	1168.63	2335.24	2	2335.24	0.0005	0	80.79	8.3e-09	K	GQAVTLLPFFTSLTGGSLEELR	R					Elution from: 99.9199 to 99.9199 RT Apex: 99.91 FinneganScanNumber: 37086
1	1	PRKDC_HUMAN	DNA-dependent protein kinase catalytic subunit OS=Homo sapiens OX=9606 GN=PRKDC PE=1 SV=3	12983	473749	663	475	246	192	62	19736	1	1	1	779.422	2335.24	3	2335.24	0.0021	0	59.18	1.2e-06	K	GQAVTLLPFFTSLTGGSLEELR	R					Elution from: 99.9284 to 99.9284 RT Apex: 99.91 FinneganScanNumber: 37092
1	1	PRKDC_HUMAN	DNA-dependent protein kinase catalytic subunit OS=Homo sapiens OX=9606 GN=PRKDC PE=1 SV=3	12983	473749	663	475	246	192	62	20249	1	1	1	798.723	2393.15	3	2393.15	0.0007	0	55.63	2.7e-06	R	VEQLFQVMNGILAQDSACSQR	A					Elution from: 90.3005 to 90.3005 RT Apex: 90.35 FinneganScanNumber: 34164
1	1	PRKDC_HUMAN	DNA-dependent protein kinase catalytic subunit OS=Homo sapiens OX=9606 GN=PRKDC PE=1 SV=3	12983	473749	663	475	246	192	62	20250	1	1	1	1197.58	2393.15	2	2393.15	0.0043	0	66.85	2.1e-07	R	VEQLFQVMNGILAQDSACSQR	A					Elution from: 90.3082 to 90.3082 RT Apex: 90.36 FinneganScanNumber: 34167
1	1	PRKDC_HUMAN	DNA-dependent protein kinase catalytic subunit OS=Homo sapiens OX=9606 GN=PRKDC PE=1 SV=3	12983	473749	663	475	246	192	62	20256	1	1	1	1198.07	2394.13	2	2394.13	-0.0005	0	27.96	0.0016	R	VEQLFQVMNGILAQDSACSQR	A	Deamidated (NQ)	0.000000001000000000000.0			Elution from: 81.1435 to 81.1435 RT Apex: 81.25 FinneganScanNumber: 30724
1	1	PRKDC_HUMAN	DNA-dependent protein kinase catalytic subunit OS=Homo sapiens OX=9606 GN=PRKDC PE=1 SV=3	12983	473749	663	475	246	192	62	20257	1	1	1	799.051	2394.13	3	2394.13	-0.0005	0	16.11	0.024	R	VEQLFQVMNGILAQDSACSQR	A	Deamidated (NQ)	0.000000001000000000000.0			Elution from: 93.6987 to 93.6987 RT Apex: 93.89 FinneganScanNumber: 35277
1	1	PRKDC_HUMAN	DNA-dependent protein kinase catalytic subunit OS=Homo sapiens OX=9606 GN=PRKDC PE=1 SV=3	12983	473749	663	475	246	192	62	20258	1	1	1	799.051	2394.13	3	2394.13	-0.0002	0	36.12	0.00024	R	VEQLFQVMNGILAQDSACSQR	A	Deamidated (NQ)	0.000000001000000000000.0			Elution from: 81.1258 to 81.1258 RT Apex: 81.23 FinneganScanNumber: 30714
1	1	PRKDC_HUMAN	DNA-dependent protein kinase catalytic subunit OS=Homo sapiens OX=9606 GN=PRKDC PE=1 SV=3	12983	473749	663	475	246	192	62	20259	1	1	1	1198.07	2394.13	2	2394.13	0.0007	0	42.27	5.9e-05	R	VEQLFQVMNGILAQDSACSQR	A	Deamidated (NQ)	0.000000001000000000000.0			Elution from: 93.8781 to 93.8781 RT Apex: 93.89 FinneganScanNumber: 35332
1	1	PRKDC_HUMAN	DNA-dependent protein kinase catalytic subunit OS=Homo sapiens OX=9606 GN=PRKDC PE=1 SV=3	12983	473749	663	475	246	192	62	20260	1	1	1	799.053	2394.14	3	2394.13	0.0049	0	47.71	1.7e-05	R	VEQLFQVMNGILAQDSACSQR	A	Deamidated (NQ)	0.000000001000000000000.0			Elution from: 87.5674 to 87.5674 RT Apex: 87.61 FinneganScanNumber: 33189
1	1	PRKDC_HUMAN	DNA-dependent protein kinase catalytic subunit OS=Homo sapiens OX=9606 GN=PRKDC PE=1 SV=3	12983	473749	663	475	246	192	62	20323	1	1	1	800.74	2399.2	3	2399.2	-0.0026	1	56.43	2.3e-06	R	IIANALSSEPACLAEIEEDKAR	R					Elution from: 63.2704 to 63.2704 RT Apex: 63.53 FinneganScanNumber: 22979
1	1	PRKDC_HUMAN	DNA-dependent protein kinase catalytic subunit OS=Homo sapiens OX=9606 GN=PRKDC PE=1 SV=3	12983	473749	663	475	246	192	62	20904	1	1	1	620.068	2476.24	4	2476.24	0.0011	0	44.85	3.3e-05	R	SHFASSHALICISHWILGIGDR	H					Elution from: 75.7796 to 75.7796 RT Apex: 75.81 FinneganScanNumber: 28417
1	1	PRKDC_HUMAN	DNA-dependent protein kinase catalytic subunit OS=Homo sapiens OX=9606 GN=PRKDC PE=1 SV=3	12983	473749	663	475	246	192	62	20988	1	1	1	831.455	2491.34	3	2491.34	-0.0009	1	17.84	0.016	K	GQAVTLLPFFTSLTGGSLEELRR	V					Elution from: 98.1007 to 98.1007 RT Apex: 98.20 FinneganScanNumber: 36603
1	1	PRKDC_HUMAN	DNA-dependent protein kinase catalytic subunit OS=Homo sapiens OX=9606 GN=PRKDC PE=1 SV=3	12983	473749	663	475	246	192	62	21030	1	1	1	835.418	2503.23	3	2503.23	0.0001	0	36.6	0.00022	K	EEENASVIDSAELQAYPALVVEK	M					Elution from: 80.3928 to 80.3928 RT Apex: 80.41 FinneganScanNumber: 30419
1	1	PRKDC_HUMAN	DNA-dependent protein kinase catalytic subunit OS=Homo sapiens OX=9606 GN=PRKDC PE=1 SV=3	12983	473749	663	475	246	192	62	21367	1	1	1	854.754	2561.24	3	2561.24	-0.0033	0	52.43	5.7e-06	K	ITAQSIEELCAVNLYGPDAQVDR	S					Elution from: 79.3917 to 79.3917 RT Apex: 78.74 FinneganScanNumber: 29965
1	1	PRKDC_HUMAN	DNA-dependent protein kinase catalytic subunit OS=Homo sapiens OX=9606 GN=PRKDC PE=1 SV=3	12983	473749	663	475	246	192	62	21368	1	1	1	854.755	2561.24	3	2561.24	0.0015	0	73.73	4.2e-08	K	ITAQSIEELCAVNLYGPDAQVDR	S					Elution from: 78.6251 to 78.6251 RT Apex: 78.74 FinneganScanNumber: 29663
1	1	PRKDC_HUMAN	DNA-dependent protein kinase catalytic subunit OS=Homo sapiens OX=9606 GN=PRKDC PE=1 SV=3	12983	473749	663	475	246	192	62	21369	1	1	1	1281.63	2561.24	2	2561.24	0.0017	0	94.88	3.3e-10	K	ITAQSIEELCAVNLYGPDAQVDR	S					Elution from: 78.6400 to 78.6400 RT Apex: 78.74 FinneganScanNumber: 29671
1	1	PRKDC_HUMAN	DNA-dependent protein kinase catalytic subunit OS=Homo sapiens OX=9606 GN=PRKDC PE=1 SV=3	12983	473749	663	475	246	192	62	21370	1	1	1	641.319	2561.25	4	2561.24	0.0021	0	65.27	3e-07	K	ITAQSIEELCAVNLYGPDAQVDR	S					Elution from: 78.7425 to 78.7425 RT Apex: 78.72 FinneganScanNumber: 29711
1	1	PRKDC_HUMAN	DNA-dependent protein kinase catalytic subunit OS=Homo sapiens OX=9606 GN=PRKDC PE=1 SV=3	12983	473749	663	475	246	192	62	21371	1	1	1	1281.63	2561.25	2	2561.24	0.0041	0	63.4	4.6e-07	K	ITAQSIEELCAVNLYGPDAQVDR	S					Elution from: 79.4749 to 79.4749 RT Apex: 78.74 FinneganScanNumber: 30009
1	1	PRKDC_HUMAN	DNA-dependent protein kinase catalytic subunit OS=Homo sapiens OX=9606 GN=PRKDC PE=1 SV=3	12983	473749	663	475	246	192	62	21685	1	1	1	873.798	2618.37	3	2618.37	-0.0007	0	80.06	9.9e-09	R	GLGQECVLSSSPAVLALQTSLVFSR	D					Elution from: 99.8667 to 99.8667 RT Apex: 99.85 FinneganScanNumber: 37057
1	1	PRKDC_HUMAN	DNA-dependent protein kinase catalytic subunit OS=Homo sapiens OX=9606 GN=PRKDC PE=1 SV=3	12983	473749	663	475	246	192	62	21769	1	1	1	878.116	2631.33	3	2631.33	-0.002	1	64.61	3.5e-07	R	KEEENASVIDSAELQAYPALVVEK	M					Elution from: 70.1176 to 70.1176 RT Apex: 69.46 FinneganScanNumber: 25943
1	1	PRKDC_HUMAN	DNA-dependent protein kinase catalytic subunit OS=Homo sapiens OX=9606 GN=PRKDC PE=1 SV=3	12983	473749	663	475	246	192	62	21770	1	1	1	1316.67	2631.33	2	2631.33	0.0024	1	91.79	6.6e-10	R	KEEENASVIDSAELQAYPALVVEK	M					Elution from: 69.3563 to 69.3563 RT Apex: 69.47 FinneganScanNumber: 25625
1	1	PRKDC_HUMAN	DNA-dependent protein kinase catalytic subunit OS=Homo sapiens OX=9606 GN=PRKDC PE=1 SV=3	12983	473749	663	475	246	192	62	21771	1	1	1	1316.67	2631.33	2	2631.33	0.0032	1	76.38	2.3e-08	R	KEEENASVIDSAELQAYPALVVEK	M					Elution from: 70.2306 to 70.2306 RT Apex: 70.26 FinneganScanNumber: 25992
1	1	PRKDC_HUMAN	DNA-dependent protein kinase catalytic subunit OS=Homo sapiens OX=9606 GN=PRKDC PE=1 SV=3	12983	473749	663	475	246	192	62	21772	1	1	1	878.118	2631.33	3	2631.33	0.0052	1	60.94	8e-07	R	KEEENASVIDSAELQAYPALVVEK	M					Elution from: 69.3590 to 69.3590 RT Apex: 69.46 FinneganScanNumber: 25627
1	1	PRKDC_HUMAN	DNA-dependent protein kinase catalytic subunit OS=Homo sapiens OX=9606 GN=PRKDC PE=1 SV=3	12983	473749	663	475	246	192	62	21778	1	1	1	1317.16	2632.31	2	2632.31	-0.0008	1	40.46	9e-05	R	KEEENASVIDSAELQAYPALVVEK	M	Deamidated (NQ)	0.000010000000000000000000.0			Elution from: 73.8861 to 73.8861 RT Apex: 73.86 FinneganScanNumber: 27620
1	1	PRKDC_HUMAN	DNA-dependent protein kinase catalytic subunit OS=Homo sapiens OX=9606 GN=PRKDC PE=1 SV=3	12983	473749	663	475	246	192	62	22317	1	1	1	902.415	2704.22	3	2704.23	-0.0029	0	52.71	5.4e-06	R	LYHCAAYNCAISVICCVFNELK	F					Elution from: 99.7656 to 99.7656 RT Apex: 99.78 FinneganScanNumber: 37008
1	1	PRKDC_HUMAN	DNA-dependent protein kinase catalytic subunit OS=Homo sapiens OX=9606 GN=PRKDC PE=1 SV=3	12983	473749	663	475	246	192	62	22733	1	1	1	1394.23	2786.45	2	2786.45	-0.0026	0	100.02	9.9e-11	K	LDQGGVIQDFINALDQLSNPELLFK	D					Elution from: 100.0878 to 100.0878 RT Apex: 100.09 FinneganScanNumber: 37180
1	1	PRKDC_HUMAN	DNA-dependent protein kinase catalytic subunit OS=Homo sapiens OX=9606 GN=PRKDC PE=1 SV=3	12983	473749	663	475	246	192	62	22734	1	1	1	929.824	2786.45	3	2786.45	0.0014	0	86.85	2.1e-09	K	LDQGGVIQDFINALDQLSNPELLFK	D					Elution from: 100.0738 to 100.0738 RT Apex: 100.09 FinneganScanNumber: 37170
1	1	PRKDC_HUMAN	DNA-dependent protein kinase catalytic subunit OS=Homo sapiens OX=9606 GN=PRKDC PE=1 SV=3	12983	473749	663	475	246	192	62	22851	1	1	1	939.49	2815.45	3	2815.45	-0.0025	0	60.69	8.5e-07	K	FESQDTVALLEAILDGIVDPVDSTLR	D					Elution from: 100.0710 to 100.0710 RT Apex: 100.06 FinneganScanNumber: 37168
1	1	PRKDC_HUMAN	DNA-dependent protein kinase catalytic subunit OS=Homo sapiens OX=9606 GN=PRKDC PE=1 SV=3	12983	473749	663	475	246	192	62	22860	1	1	1	940.466	2818.38	3	2818.38	-0.0057	1	15.52	0.028	R	EKITAQSIEELCAVNLYGPDAQVDR	S					Elution from: 71.2669 to 71.2669 RT Apex: 71.29 FinneganScanNumber: 26445
1	1	PRKDC_HUMAN	DNA-dependent protein kinase catalytic subunit OS=Homo sapiens OX=9606 GN=PRKDC PE=1 SV=3	12983	473749	663	475	246	192	62	22871	1	1	1	1411.73	2821.45	2	2821.45	-0.0007	0	102.77	5.3e-11	K	LGLSYTPLAEVGLNALEEWSIYIDR	H					Elution from: 99.9967 to 99.9967 RT Apex: 99.99 FinneganScanNumber: 37132
1	1	PRKDC_HUMAN	DNA-dependent protein kinase catalytic subunit OS=Homo sapiens OX=9606 GN=PRKDC PE=1 SV=3	12983	473749	663	475	246	192	62	22984	1	1	1	953.157	2856.45	3	2856.45	0.0006	0	30.71	0.00085	K	VYELLGLLGEVHPSEMINNAENLFR	A					Elution from: 99.9074 to 99.9074 RT Apex: 99.87 FinneganScanNumber: 37080
1	1	PRKDC_HUMAN	DNA-dependent protein kinase catalytic subunit OS=Homo sapiens OX=9606 GN=PRKDC PE=1 SV=3	12983	473749	663	475	246	192	62	23024	1	1	1	958.486	2872.44	3	2872.44	-0.0055	0	1.71	0.68	K	VYELLGLLGEVHPSEMINNAENLFR	A	Oxidation (M)	0.0000000000000002000000000.0			Elution from: 96.4569 to 96.4569 RT Apex: 96.54 FinneganScanNumber: 36140
1	1	PRKDC_HUMAN	DNA-dependent protein kinase catalytic subunit OS=Homo sapiens OX=9606 GN=PRKDC PE=1 SV=3	12983	473749	663	475	246	192	62	23320	1	1	1	982.188	2943.54	3	2943.54	-0.0007	1	51.99	6.3e-06	K	KFESQDTVALLEAILDGIVDPVDSTLR	D					Elution from: 99.9996 to 99.9996 RT Apex: 100.06 FinneganScanNumber: 37134
1	1	PRKDC_HUMAN	DNA-dependent protein kinase catalytic subunit OS=Homo sapiens OX=9606 GN=PRKDC PE=1 SV=3	12983	473749	663	475	246	192	62	23559	1	1	1	1002.16	3003.46	3	3003.45	0.0039	0	28.55	0.0014	K	YYIQNGIQSFMQNYSSIDVLLHQSR	L					Elution from: 94.0877 to 94.0877 RT Apex: 94.06 FinneganScanNumber: 35409
1	1	PRKDC_HUMAN	DNA-dependent protein kinase catalytic subunit OS=Homo sapiens OX=9606 GN=PRKDC PE=1 SV=3	12983	473749	663	475	246	192	62	23563	1	1	1	1002.49	3004.44	3	3004.44	0	0	56.18	2.4e-06	K	YYIQNGIQSFMQNYSSIDVLLHQSR	L	Deamidated (NQ)	0.0000000100000000000000000.0			Elution from: 95.5977 to 95.5977 RT Apex: 95.71 FinneganScanNumber: 35905
1	1	PRKDC_HUMAN	DNA-dependent protein kinase catalytic subunit OS=Homo sapiens OX=9606 GN=PRKDC PE=1 SV=3	12983	473749	663	475	246	192	62	23920	1	1	1	1048.23	3141.68	3	3141.68	-0.0012	0	26.96	0.002	R	AGLLHNILPSQSTDLHHSVGTELLSLVYK	G					Elution from: 79.5231 to 79.5231 RT Apex: 79.59 FinneganScanNumber: 30033
1	1	PRKDC_HUMAN	DNA-dependent protein kinase catalytic subunit OS=Homo sapiens OX=9606 GN=PRKDC PE=1 SV=3	12983	473749	663	475	246	192	62	23921	1	1	1	786.428	3141.68	4	3141.68	0.0011	0	43.67	4.3e-05	R	AGLLHNILPSQSTDLHHSVGTELLSLVYK	G					Elution from: 79.4529 to 79.4529 RT Apex: 79.59 FinneganScanNumber: 29996
1	1	PRKDC_HUMAN	DNA-dependent protein kinase catalytic subunit OS=Homo sapiens OX=9606 GN=PRKDC PE=1 SV=3	12983	473749	663	475	246	192	62	23922	1	1	1	629.344	3141.69	5	3141.68	0.0034	0	36.55	0.00022	R	AGLLHNILPSQSTDLHHSVGTELLSLVYK	G					Elution from: 79.4691 to 79.4691 RT Apex: 79.59 FinneganScanNumber: 30005
1	1	PRKDC_HUMAN	DNA-dependent protein kinase catalytic subunit OS=Homo sapiens OX=9606 GN=PRKDC PE=1 SV=3	12983	473749	663	475	246	192	62	23923	1	1	1	629.541	3142.67	5	3142.67	0.0019	0	18.11	0.015	R	AGLLHNILPSQSTDLHHSVGTELLSLVYK	G	Deamidated (NQ)	0.00000100000000000000000000000.0			Elution from: 84.3964 to 84.3964 RT Apex: 84.41 FinneganScanNumber: 32082
1	1	PRKDC_HUMAN	DNA-dependent protein kinase catalytic subunit OS=Homo sapiens OX=9606 GN=PRKDC PE=1 SV=3	12983	473749	663	475	246	192	62	24138	1	1	1	809.385	3233.51	4	3233.52	-0.0048	0	30.23	0.00095	R	SSFDWLTGSSTDPLVDHTSPSSDSLLFAHK	R					Elution from: 82.1922 to 82.1922 RT Apex: 81.62 FinneganScanNumber: 31182
1	1	PRKDC_HUMAN	DNA-dependent protein kinase catalytic subunit OS=Homo sapiens OX=9606 GN=PRKDC PE=1 SV=3	12983	473749	663	475	246	192	62	24139	1	1	1	647.711	3233.52	5	3233.52	0.0008	0	53.91	4.1e-06	R	SSFDWLTGSSTDPLVDHTSPSSDSLLFAHK	R					Elution from: 81.5623 to 81.5623 RT Apex: 81.65 FinneganScanNumber: 30901
1	1	PRKDC_HUMAN	DNA-dependent protein kinase catalytic subunit OS=Homo sapiens OX=9606 GN=PRKDC PE=1 SV=3	12983	473749	663	475	246	192	62	24140	1	1	1	1078.85	3233.52	3	3233.52	0.0014	0	29.36	0.0012	R	SSFDWLTGSSTDPLVDHTSPSSDSLLFAHK	R					Elution from: 81.4915 to 81.4915 RT Apex: 81.62 FinneganScanNumber: 30869
1	1	PRKDC_HUMAN	DNA-dependent protein kinase catalytic subunit OS=Homo sapiens OX=9606 GN=PRKDC PE=1 SV=3	12983	473749	663	475	246	192	62	24141	1	1	1	809.387	3233.52	4	3233.52	0.002	0	41.85	6.5e-05	R	SSFDWLTGSSTDPLVDHTSPSSDSLLFAHK	R					Elution from: 79.6966 to 79.6966 RT Apex: 79.72 FinneganScanNumber: 30108
1	1	PRKDC_HUMAN	DNA-dependent protein kinase catalytic subunit OS=Homo sapiens OX=9606 GN=PRKDC PE=1 SV=3	12983	473749	663	475	246	192	62	24142	1	1	1	809.387	3233.52	4	3233.52	0.0044	0	34.83	0.00033	R	SSFDWLTGSSTDPLVDHTSPSSDSLLFAHK	R					Elution from: 81.4299 to 81.4299 RT Apex: 81.62 FinneganScanNumber: 30841
1	1	PRKDC_HUMAN	DNA-dependent protein kinase catalytic subunit OS=Homo sapiens OX=9606 GN=PRKDC PE=1 SV=3	12983	473749	663	475	246	192	62	24269	1	1	1	1105.5	3313.48	3	3313.48	0.0022	0	18.65	0.014	R	SSFDWLTGSSTDPLVDHTSPSSDSLLFAHK	R	Phospho (ST)	0.000000000000000000300000000000.0			Elution from: 88.3105 to 88.3105 RT Apex: 88.38 FinneganScanNumber: 33434
1	1	PRKDC_HUMAN	DNA-dependent protein kinase catalytic subunit OS=Homo sapiens OX=9606 GN=PRKDC PE=1 SV=3	12983	473749	663	475	246	192	62	24330	1	1	1	835.664	3338.63	4	3338.63	-0.0003	0	54.02	4e-06	R	EEESLVEQFVFEALVIYMESLALAHADEK	S					Elution from: 100.0808 to 100.0808 RT Apex: 100.06 FinneganScanNumber: 37175
1	1	PRKDC_HUMAN	DNA-dependent protein kinase catalytic subunit OS=Homo sapiens OX=9606 GN=PRKDC PE=1 SV=3	12983	473749	663	475	246	192	62	24331	1	1	1	1113.88	3338.63	3	3338.63	0.0013	0	88.98	1.3e-09	R	EEESLVEQFVFEALVIYMESLALAHADEK	S					Elution from: 100.0682 to 100.0682 RT Apex: 100.06 FinneganScanNumber: 37166
1	1	PRKDC_HUMAN	DNA-dependent protein kinase catalytic subunit OS=Homo sapiens OX=9606 GN=PRKDC PE=1 SV=3	12983	473749	663	475	246	192	62	24616	1	1	1	1141.91	3422.72	3	3422.72	-0.0015	0	58.08	1.6e-06	K	EEGVSFLINTFEGGGCGQPSGILAQPTLLYLR	G					Elution from: 99.9060 to 99.9060 RT Apex: 99.89 FinneganScanNumber: 37079
1	1	PRKDC_HUMAN	DNA-dependent protein kinase catalytic subunit OS=Homo sapiens OX=9606 GN=PRKDC PE=1 SV=3	12983	473749	663	475	246	192	62	25249	1	1	1	943.717	3770.84	4	3770.84	0.0004	1	87.42	1.8e-09	R	EFREEESLVEQFVFEALVIYMESLALAHADEK	S					Elution from: 100.0256 to 100.0256 RT Apex: 100.02 FinneganScanNumber: 37147
1	1	PRKDC_HUMAN	DNA-dependent protein kinase catalytic subunit OS=Homo sapiens OX=9606 GN=PRKDC PE=1 SV=3	12983	473749	663	475	246	192	62	25257	1	1	1	1261.23	3780.66	3	3780.67	-0.0102	1	45.23	3e-05	K	QDWVDGEPTEAEKDFWELASLDCYNHLAEWK	S					Elution from: 96.0615 to 96.0615 RT Apex: 96.04 FinneganScanNumber: 36028
1	1	PRKDC_HUMAN	DNA-dependent protein kinase catalytic subunit OS=Homo sapiens OX=9606 GN=PRKDC PE=1 SV=3	12983	473749	663	475	246	192	62	25982	1	1	1	1242.07	4964.25	4	4964.25	0.0005	0	54.71	3.4e-06	R	AFQHLSEAVQAAEEEAQPPSWSCGPAAGVIDAYMTLADFCDQQLR	K					Elution from: 99.8820 to 99.8820 RT Apex: 99.87 FinneganScanNumber: 37065
Removing duplicates
FHGVLK
NNITQK
EILPEK
CTVVVR
NILAFR
NWYPR
LDLHLK
WVELAK
QSFVDR
VPADLLK
HVFHPK
AFLGELK
LLQTFR
LMDEFK
APGLGAFR
DSPLETK
DYVAVAR
IGELFSK
CFFLSK
ELSIAIR
LLSITVR
LNSNEAR
SVGPDFGK
IAGFDER
LPPDVLR
GIAPGDER
DEVLANR
KYIEIR
VFLALAAK
TFPVLLR
LSLMYAR
LKPVELR
SPNLWLK
APPCEYK
HNLEIIK
DLPSWMK
VTVMASLR
FGKEVAVK
LLNFLMK
LLQIIER
DWSNDVR
AAYLSDPR
TQMTSAVR
FIVCLNK
DFVQVMR
SYVAWDR
SIELFYK
EFPPGTPR
SFPPLADR
TSPQEGER
LLQDFNR
EPSFDWK
IPDTVLEK
LPSNTLDR
LAAVVSACK
VIAGLYQR
YFEGVSPK
WPVAGQIR
DYVDLFR
MAVLALLAK
YAVPSAGLR
TLVECWK
LSFAVPFR
HSPEDPEK
TETVTSFR
FYGELALK
TQEGSLSAR
TSALSDETK
LLPAELPAK
CDSWWAK
DSKPPGNLK
LLEEALLR
MYAALGDPK
SLNSIEFR
MQLVCCR
KFIQTFGK
LPVLAGCLK
IPALDLLIK
ILDVMYSR
DILETHLR
RTFPVLLR
EIFNFVLK
CFGTGAAGNR
FVPLLPGNR
LLNTWTNR
IAPYSVEIK
DCLSIPYR
VCLDIIYK
LPLISGFYK
KIPDTVLEK
SIGEYDVLR
GIFTSEIGTK
AIRPQIDLK
DFGLLVFVR
GYGLFAGPCK
FLCIFLEK
NTCTSVYTK
NFWSHETR
KCDSWWAK
RYAVPSAGLR
QDAQVVLYR
QITPQQQEK
LQETLSAADR
LLPAELPAKR
SKDFVQVMR
YSCFALFVK
HGDLPDIQIK
TYSVVPMTSR
ICSKPVVLPK
GPESESEDHR
AALSALESFLK
LGLPGDEVDNK
DLCNTHLMR
QGNLSSQVPLK
NNWEVSALSR
VTELALTASDR
LACDVDQVTR
SMEEDPQTSR
KQNNFSLAMK
FNNYVDCMK
GKPLPEYHVR
LGNPIVPLNIR
LATTILQHWK
LLALNSLYSPK
TWEGWEPWM
QFINLMLPMK
AYVPALQMAFK
GLSSLLCNFTK
WCAHTNVELK
TLCLEVVLCR
CGAALAGHQLIR
KAALSALESFLK
CKIPALDLLIK
ECSPWMSDFK
DQNILLGTTYR
QITQSALLAEAR
DILPCLDGYLK
YPEETLSLMTK
QCLPSLDLSCK
MSTSPEAFLALR
QGNLSSQVPLKR
HDVGAYMLMYK
LGASLAFNNIYR
QLFSSLFSGILK
FMNAVFFLLPK
MKQDAQVVLYR
HECMAPLTALVK
LYSLALHPNAFK
LGLPGDEVDNKVK
NELEIPGQYDGR
LNESTFDTQITK
GGSWIQEINVAEK
DLLLNTMSQEEK
VVQMLGSLGGQINK
NLLIFENLIDLK
SQGCSEQVLTVLK
VEGMTELYFQLK
SLGPPQGEEDSVPR
NLLTVTSSDEMMK
ILELSGSSSEDSEK
NCISTVVHQGLIR
QDWVDGEPTEAEK
APPCEYKDWLTK
NILEESLCELVAK
HSSLITPLQAVAQR
QMFLTQTDTGDDR
DVDFMYVELIQR
KGGSWIQEINVAEK
NVDSNNKELSIAIR
NLSSNEAISLEEIR
EVYAAAAEVLGLILR
CLMDQATDPNILGR
YNFPVEVEVPMER
GFPPSASLCLLDLVK
DFSAFINLVEFCR
FYQGFLFSEKPEK
ETGLMYSIMVHALR
LGLIEWLENTVTLK
AQEPESGLSEETQVK
KQNNFSLAMKLLK
RILELSGSSSEDSEK
SDPGLLTNTMDVFVK
LSDFNDITNMLLLK
KNILEESLCELVAK
MVSAVLNGMLDQSFR
LVINTEEVFRPYAK
EFFSTIVVDAIDVLK
EMKPVIFLDVFLPR
LQYFMEQFYGIIR
DDWLVSWVQSYCR
MDPMNIWDDIITNR
DPESETDNDSQEIFK
VLEQLIVAHFPMQSR
TVSLLDENNVSSYLSK
SLLTLLWHCSLDALR
MEVQEQEEDISSLIR
TVGALQVLGTEAQSSLLK
EQQHVMEELFQSSFR
LLLQGEADQSLLTFIDK
ATQQQHDFTLTQTADGR
IMEFTTTLLNTSPEGWK
TRDDWLVSWVQSYCR
NLDLAVLELMQSSVDNTK
SLGTIQQCCDAIDHLCR
INQVFHGSCITEGNELTK
QLASGLLELAFAFGGLCER
ATQMPEGGQGAPPMYQLYK
GSCVTQVGLLESVYEMFR
AVAFFLESIAMHDIIAAEK
ELLNPVVEFVSHPSTTCR
DVLIQGLIDENPGLQLIIR
LAGANPAVITCDELLLGHEK
DPTVHDDVLELEMDELNR
IIANALSSEPACLAEIEEDK
LQSVQALTEIQEFISFISK
IWSEPFYQETYLPYMIR
SLEYCSTASIDSENPPDLNK
KLAGANPAVITCDELLLGHEK
LCYDAFTENMAGENQLLER
STVLTPMFVETQASQGTLQTR
DFWELASLDCYNHLAEWK
LTPLPEDNSMNVDQDGDPSDR
GQAVTLLPFFTSLTGGSLEELR
VEQLFQVMNGILAQDSACSQR
IIANALSSEPACLAEIEEDKAR
SHFASSHALICISHWILGIGDR
GQAVTLLPFFTSLTGGSLEELRR
EEENASVIDSAELQAYPALVVEK
ITAQSIEELCAVNLYGPDAQVDR
GLGQECVLSSSPAVLALQTSLVFSR
KEEENASVIDSAELQAYPALVVEK
LYHCAAYNCAISVICCVFNELK
LDQGGVIQDFINALDQLSNPELLFK
FESQDTVALLEAILDGIVDPVDSTLR
EKITAQSIEELCAVNLYGPDAQVDR
LGLSYTPLAEVGLNALEEWSIYIDR
VYELLGLLGEVHPSEMINNAENLFR
KFESQDTVALLEAILDGIVDPVDSTLR
YYIQNGIQSFMQNYSSIDVLLHQSR
AGLLHNILPSQSTDLHHSVGTELLSLVYK
SSFDWLTGSSTDPLVDHTSPSSDSLLFAHK
EEESLVEQFVFEALVIYMESLALAHADEK
EEGVSFLINTFEGGGCGQPSGILAQPTLLYLR
EFREEESLVEQFVFEALVIYMESLALAHADEK
QDWVDGEPTEAEKDFWELASLDCYNHLAEWK
AFQHLSEAVQAAEEEAQPPSWSCGPAAGVIDAYMTLADFCDQQLR
